# Supplementary material for: 4,7-Substituted 1,10-phenanthroline-2,9-dicarboxamides: photophysics of ligands and their complexes with the Eu–Gd–Tb triad
Source: Royal Society of Chemistry journal article supplement (doi:10.1039/d4dt01698j), 2024-01-01
Supplement: d4dt01698j1.pdf [file d4dt01698j1.pdf]

## **4,7-Substituted 1,10-phenanthroline-2,9-dicarboxamides: photophysics of ligands and their complexes with the Eu-Gd-Tb triad**

**Nane A. Avagyan,<sup>a</sup> Pavel S. Lempert,<sup>a</sup> Trofim A. Polikovskiy,<sup>b</sup> Alisia V. Tsorieva,<sup>b</sup> Mikhail T. Metlin,<sup>b</sup> Ilya V. Taydakov,<sup>b</sup> Roman V. Zonov,<sup>a</sup> Konstantin A. Lyssenko,<sup>a</sup> Mikhail F. Vokuev,<sup>a</sup> Igor A. Rodin,<sup>a</sup> Boris N. Tarasevich,<sup>a</sup> Yuri A. Ustynyuk,<sup>a</sup> Valentine G. Nenajdenko<sup>a\*</sup>**

<sup>a</sup> Department of Chemistry, Lomonosov Moscow State University, Leninskie gory 1 bld. 3, Moscow, Russia; nenajdenko@gmail.com (V.N.)

<sup>b</sup> P.N. Lebedev Physical Institute of the Russian Academy of Sciences, 53 Leninskiy Prospect, 119991 Moscow, Russia

\* Correspondence to: nenajdenko@gmail.com (V.N.)

### **Supplementary Materials**

#### **Table of contents**

|                                                     |         |
|-----------------------------------------------------|---------|
| 1. X-ray analysis.....                              | S2-S5   |
| 2. NMR and IR spectra of synthesized compounds..... | S6-S28  |
| 3. Photoluminescence.....                           | S29     |
| 4. DFT calculations.....                            | S30-S50 |
| 5. References.....                                  | S51     |

## 1. X-ray analysis

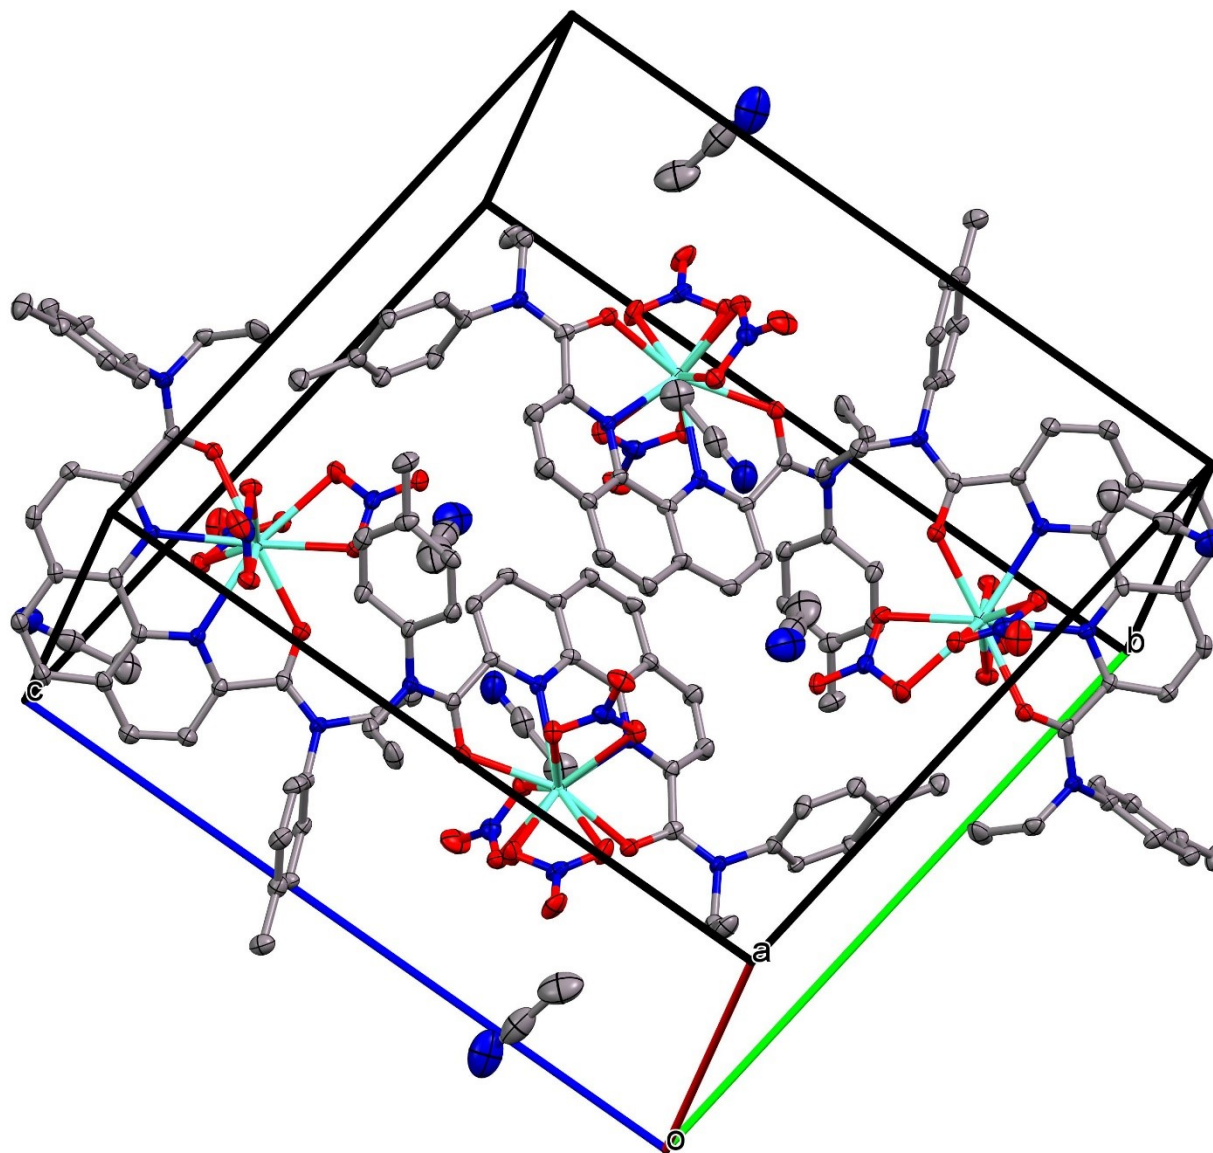

**Figure S1.** The crystal packing of LH•Eu(NO<sub>3</sub>)<sub>3</sub>. Hydrogen atoms are omitted for clarity and the non-hydrogen atoms are shown as thermal ellipsoids at 50% probability level.

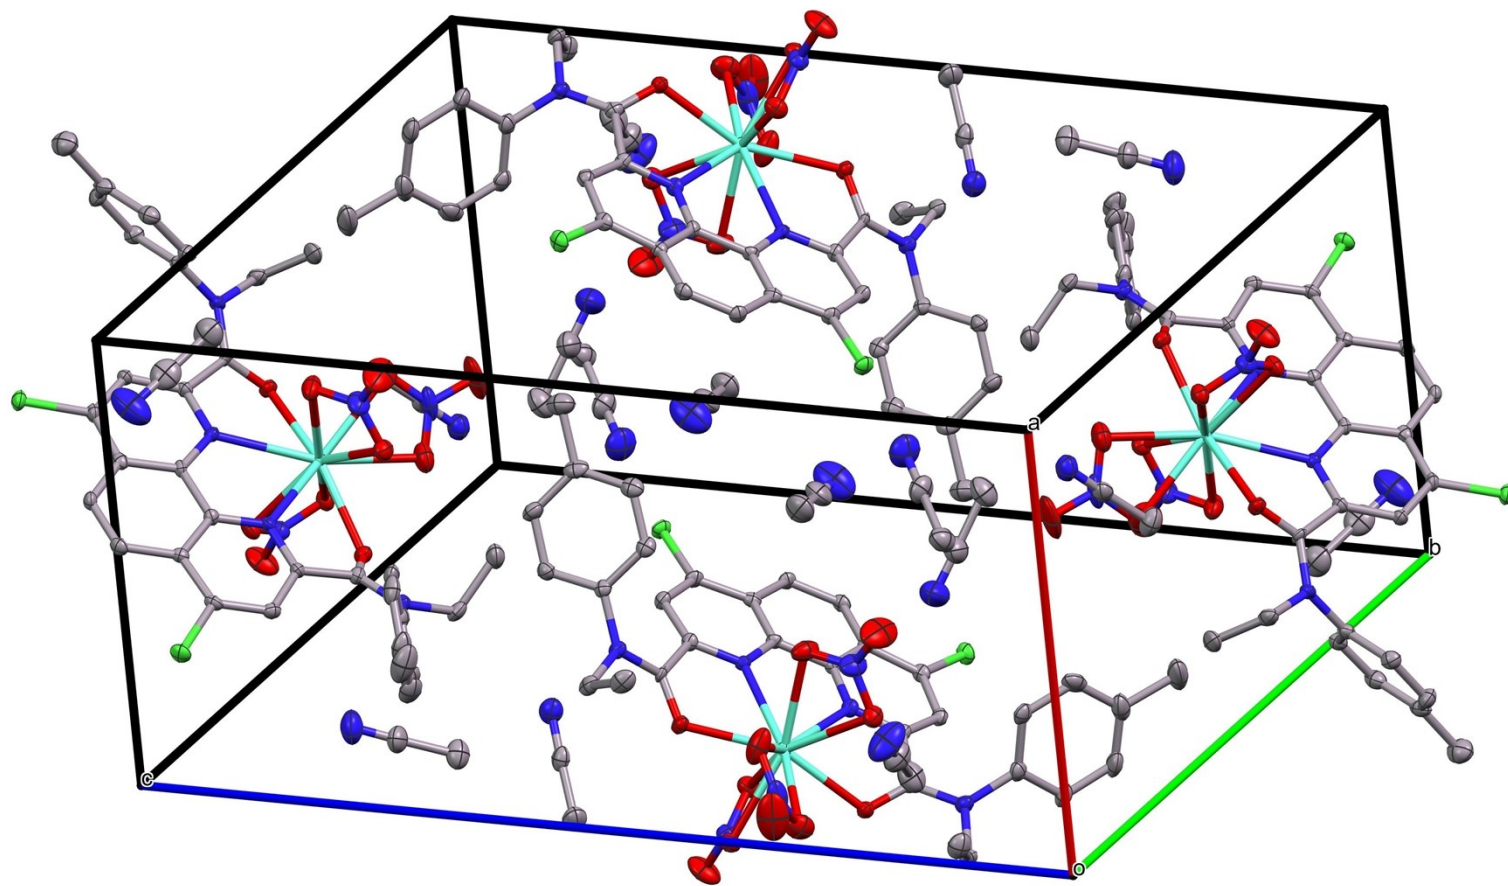

**Figure S2.** The crystal packing of  $\text{LCl}\cdot\text{Eu}(\text{NO}_3)_3$ . Hydrogen atoms are omitted for clarity and the non-hydrogen atoms are shown as thermal ellipsoids at 50% probability level.

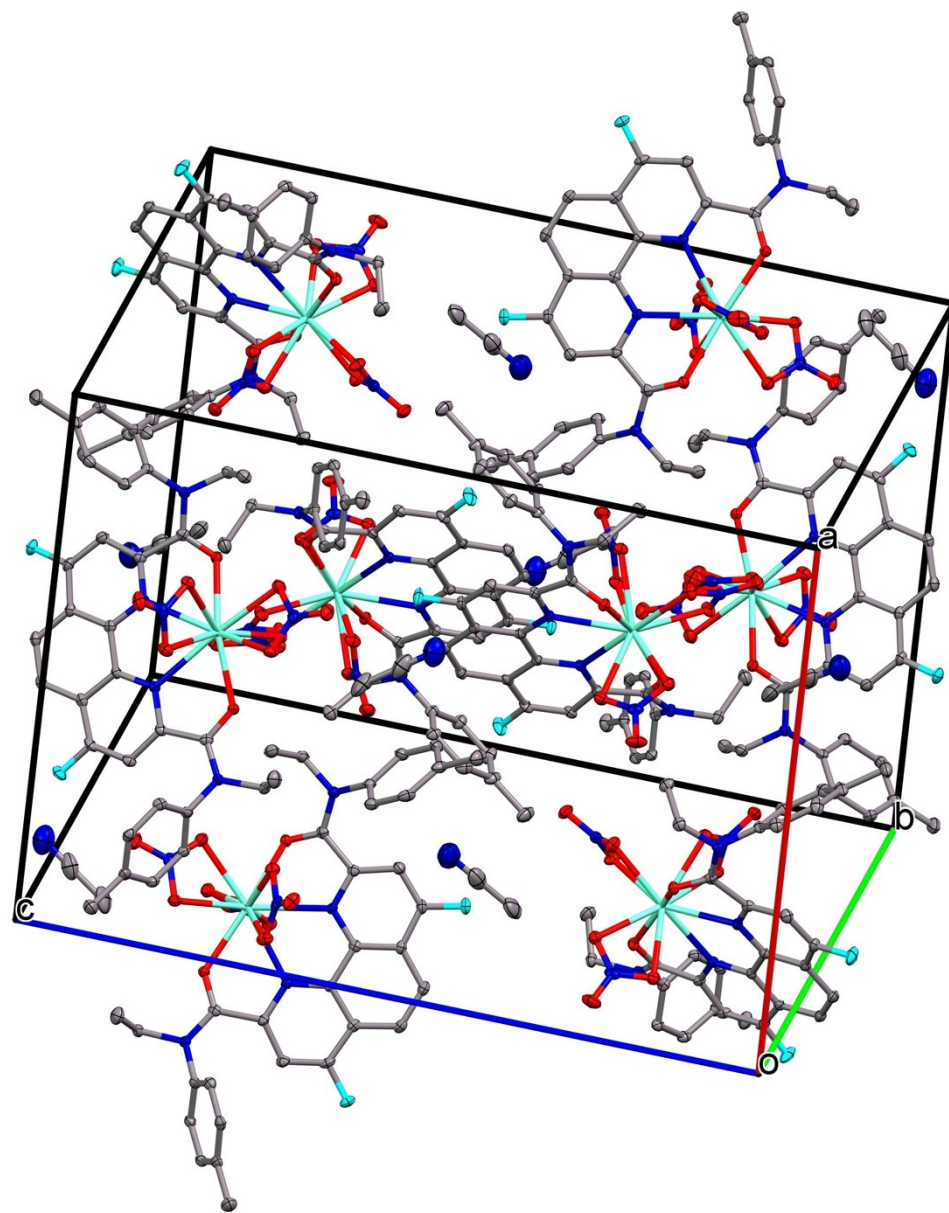

**Figure S3.** The crystal packing of LF•Eu(NO<sub>3</sub>)<sub>3</sub>. Hydrogen atoms are omitted for clarity and the non-hydrogen atoms are shown as thermal ellipsoids at 50% probability level.

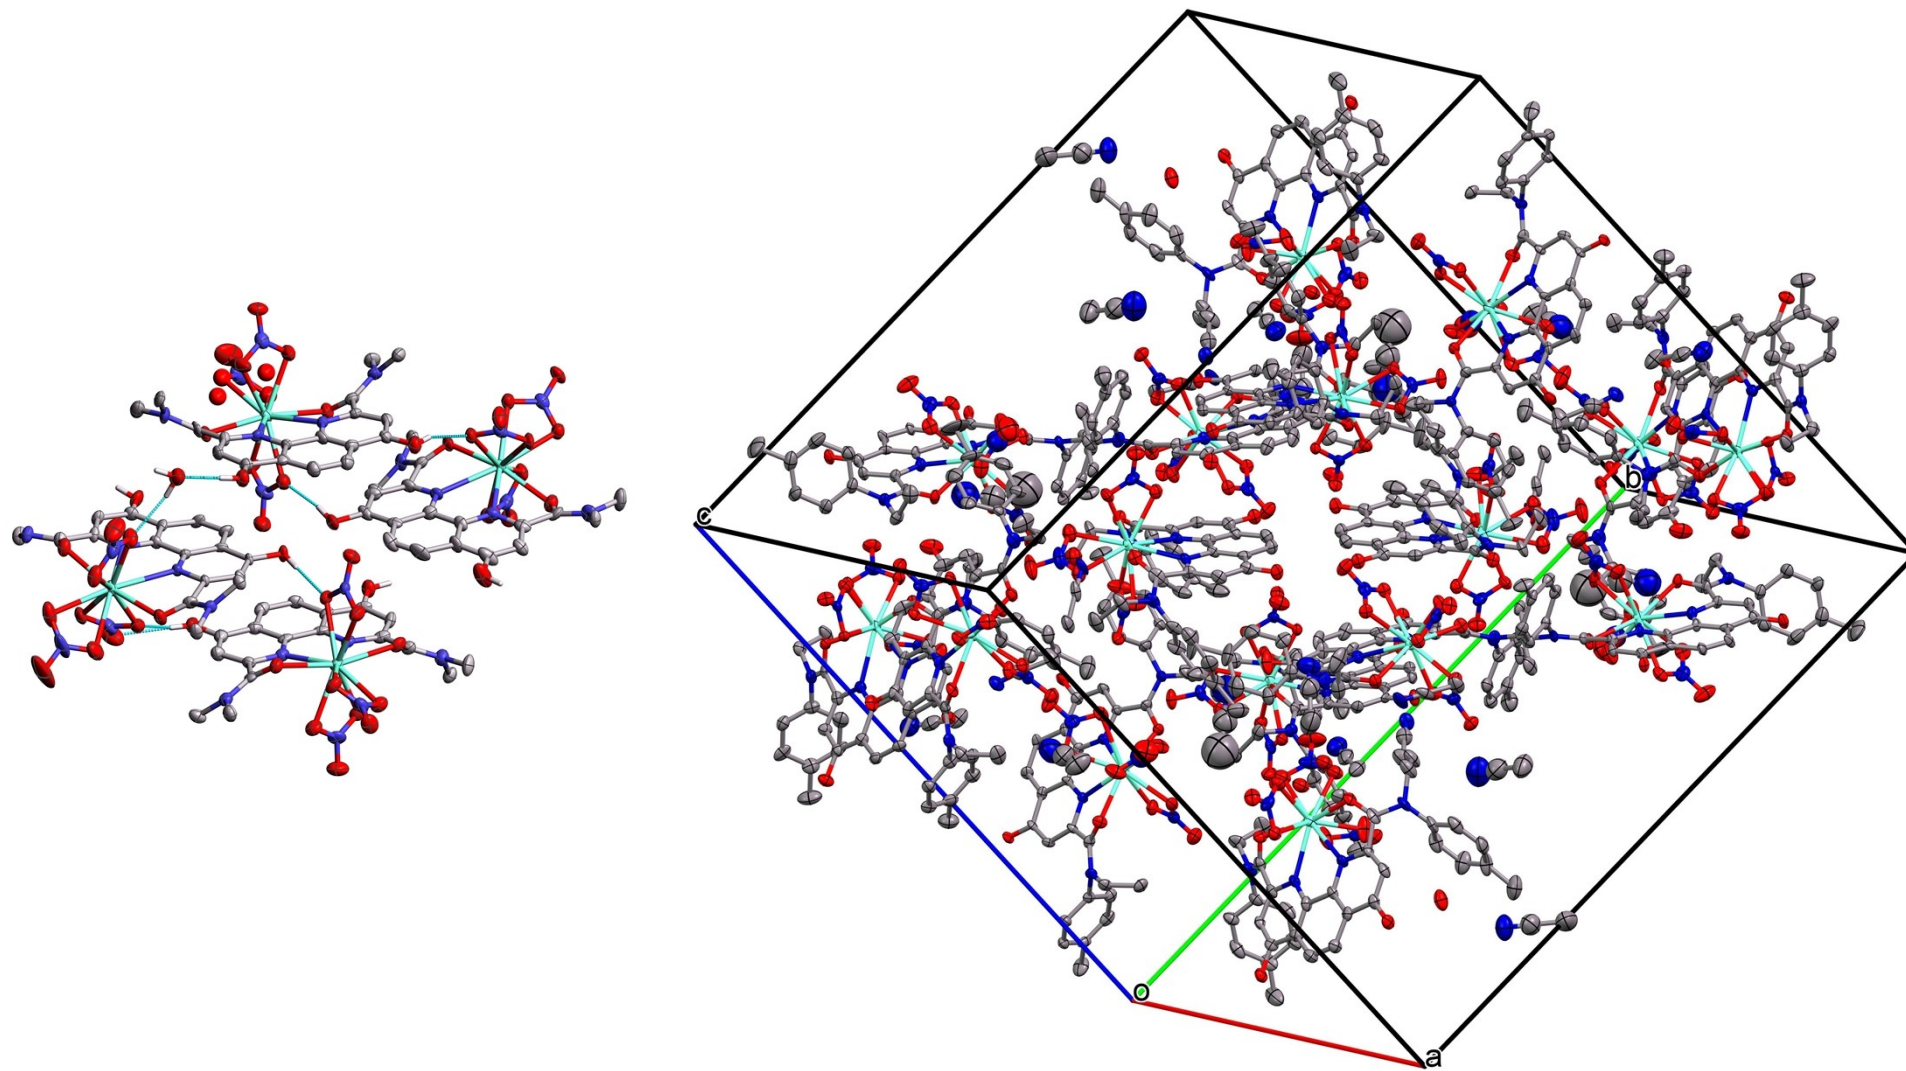

**Figure S4.** General view of a fragment of the  $\text{LOH}\cdot\text{Eu}(\text{NO}_3)_3$  crystal and the crystal packing. Hydrogen atoms are omitted for clarity and the non-hydrogen atoms are shown as thermal ellipsoids at 50% probability level.

## 2. NMR and IR spectra of synthesized compounds

*N*<sup>2</sup>,*N*<sup>9</sup>-diethyl-*N*<sup>2</sup>,*N*<sup>9</sup>-di-*p*-tolyl-1,10-phenanthroline-2,9-dicarboxamide europium trinitrate LH•Eu(NO<sub>3</sub>)<sub>3</sub>

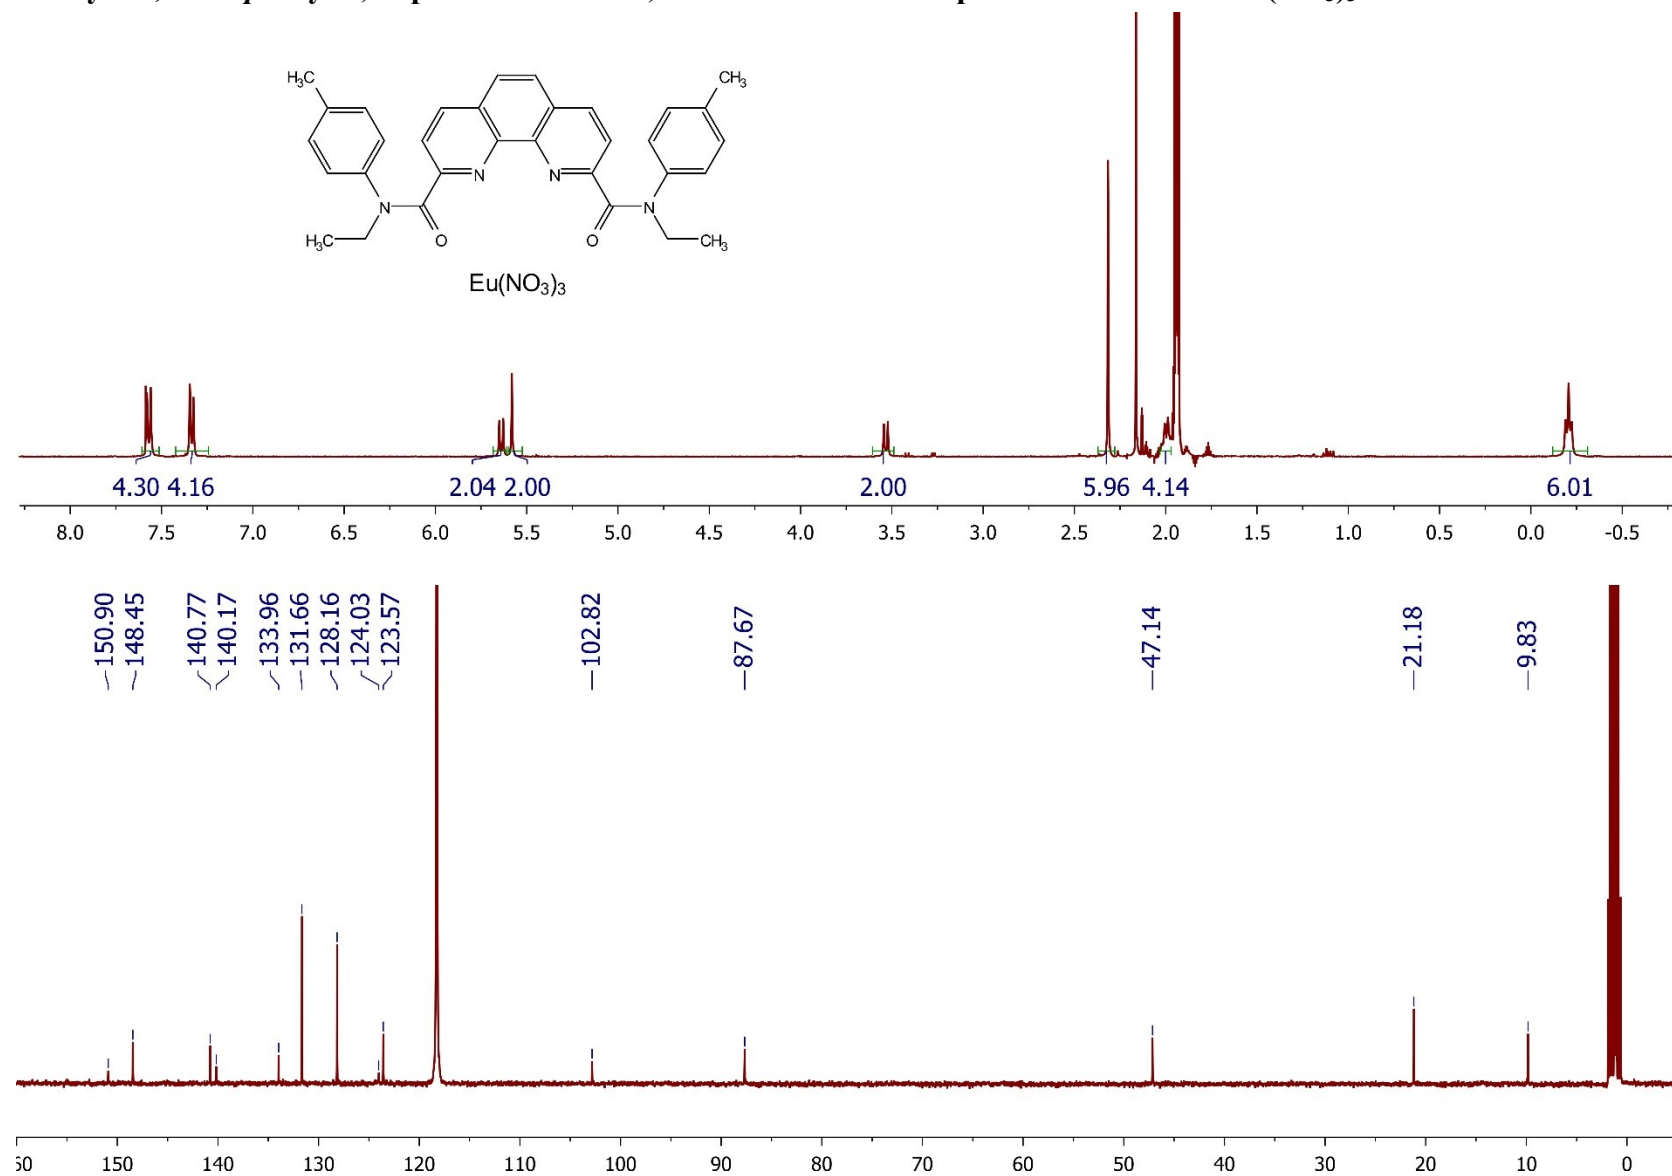

Figure S5.  $^1\text{H}$  and  $^{13}\text{C}$  NMR spectra in  $\text{CD}_3\text{CN}$  at  $25^\circ\text{C}$

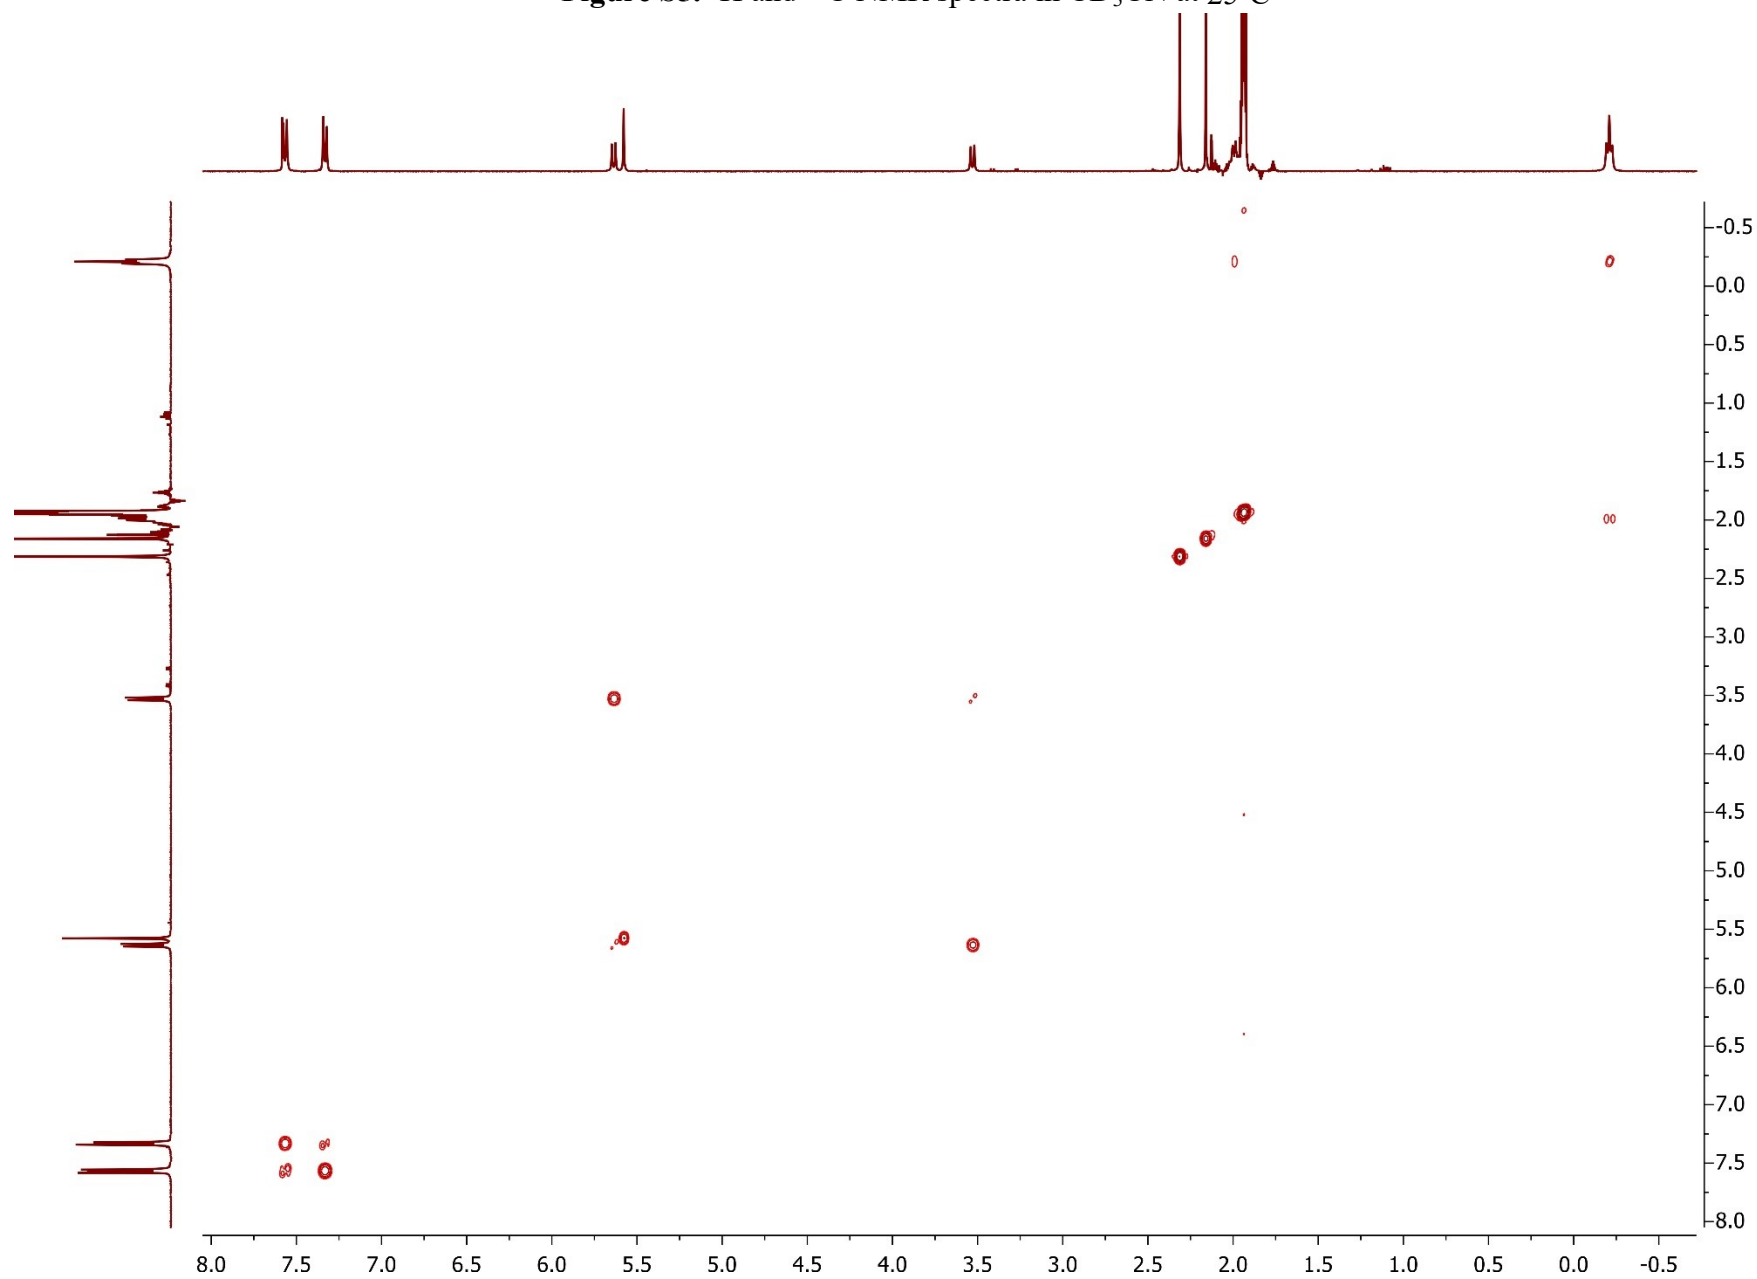

Figure S6.  $^1\text{H}/^1\text{H}$  COSY NMR spectrum in  $\text{CD}_3\text{CN}$  at  $25^\circ\text{C}$

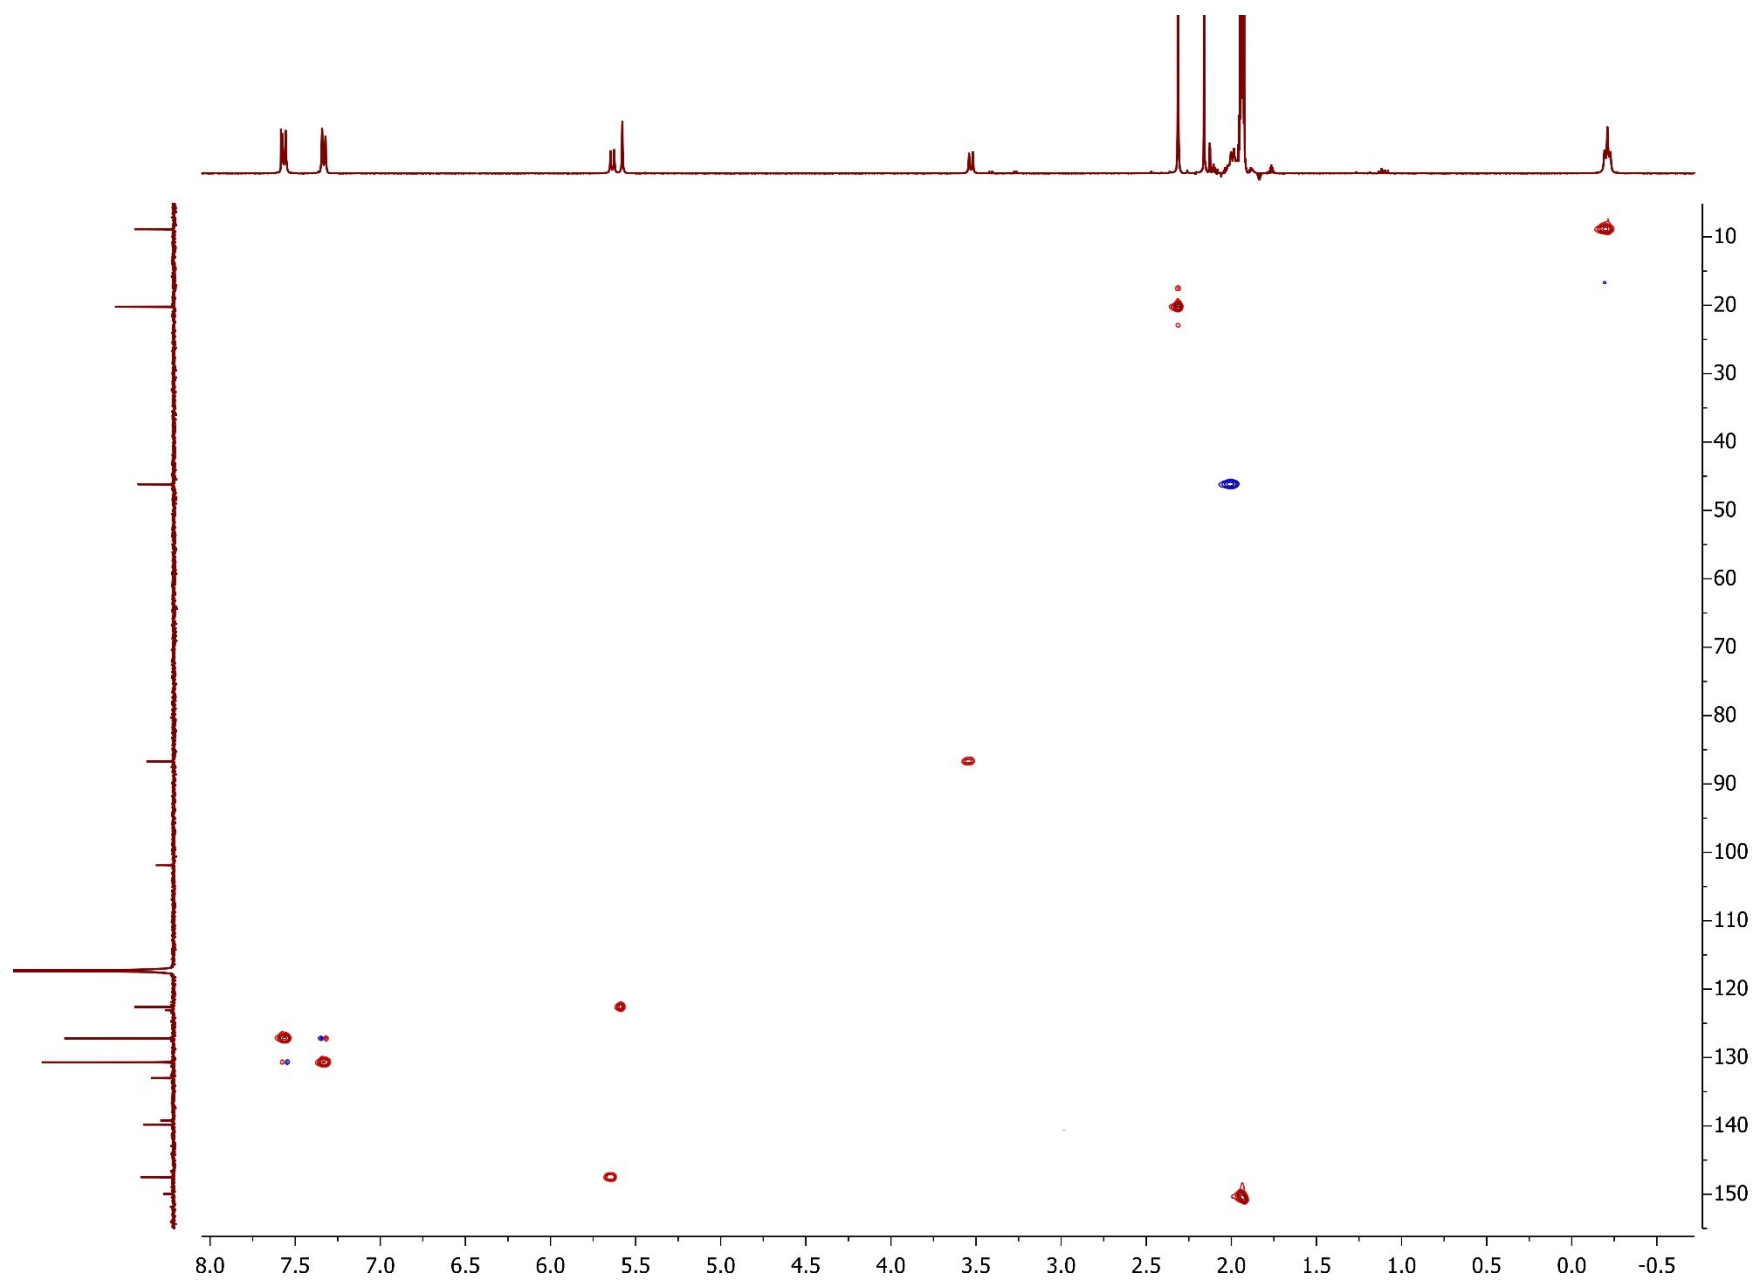



Figure S7.  $^1\text{H}/^{13}\text{C}$  HSQC NMR spectrum in  $\text{CD}_3\text{CN}$  at  $25^\circ\text{C}$

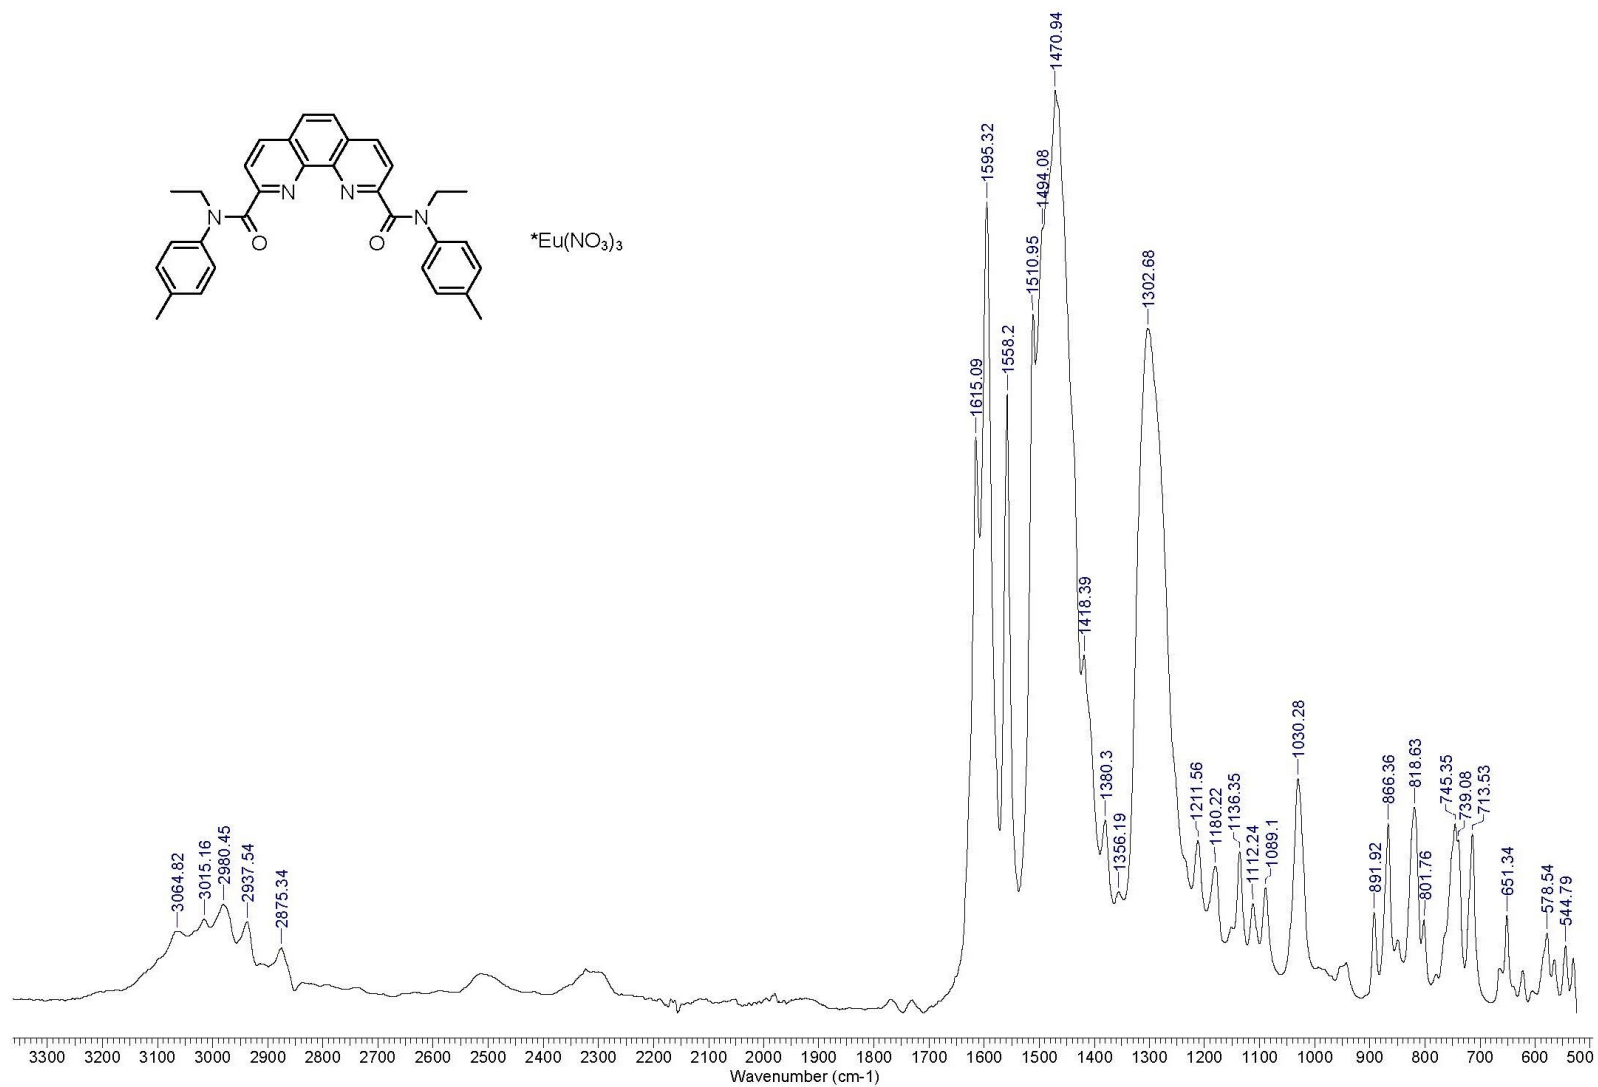

Figure S8. Solid-state IR spectrum at  $25^\circ\text{C}$

*N*<sup>2</sup>,*N*<sup>9</sup>-diethyl-*N*<sup>2</sup>,*N*<sup>9</sup>-di-*p*-tolyl-1,10-phenanthroline-2,9-dicarboxamide gadolinium trinitrate LH•Gd(NO<sub>3</sub>)<sub>3</sub>

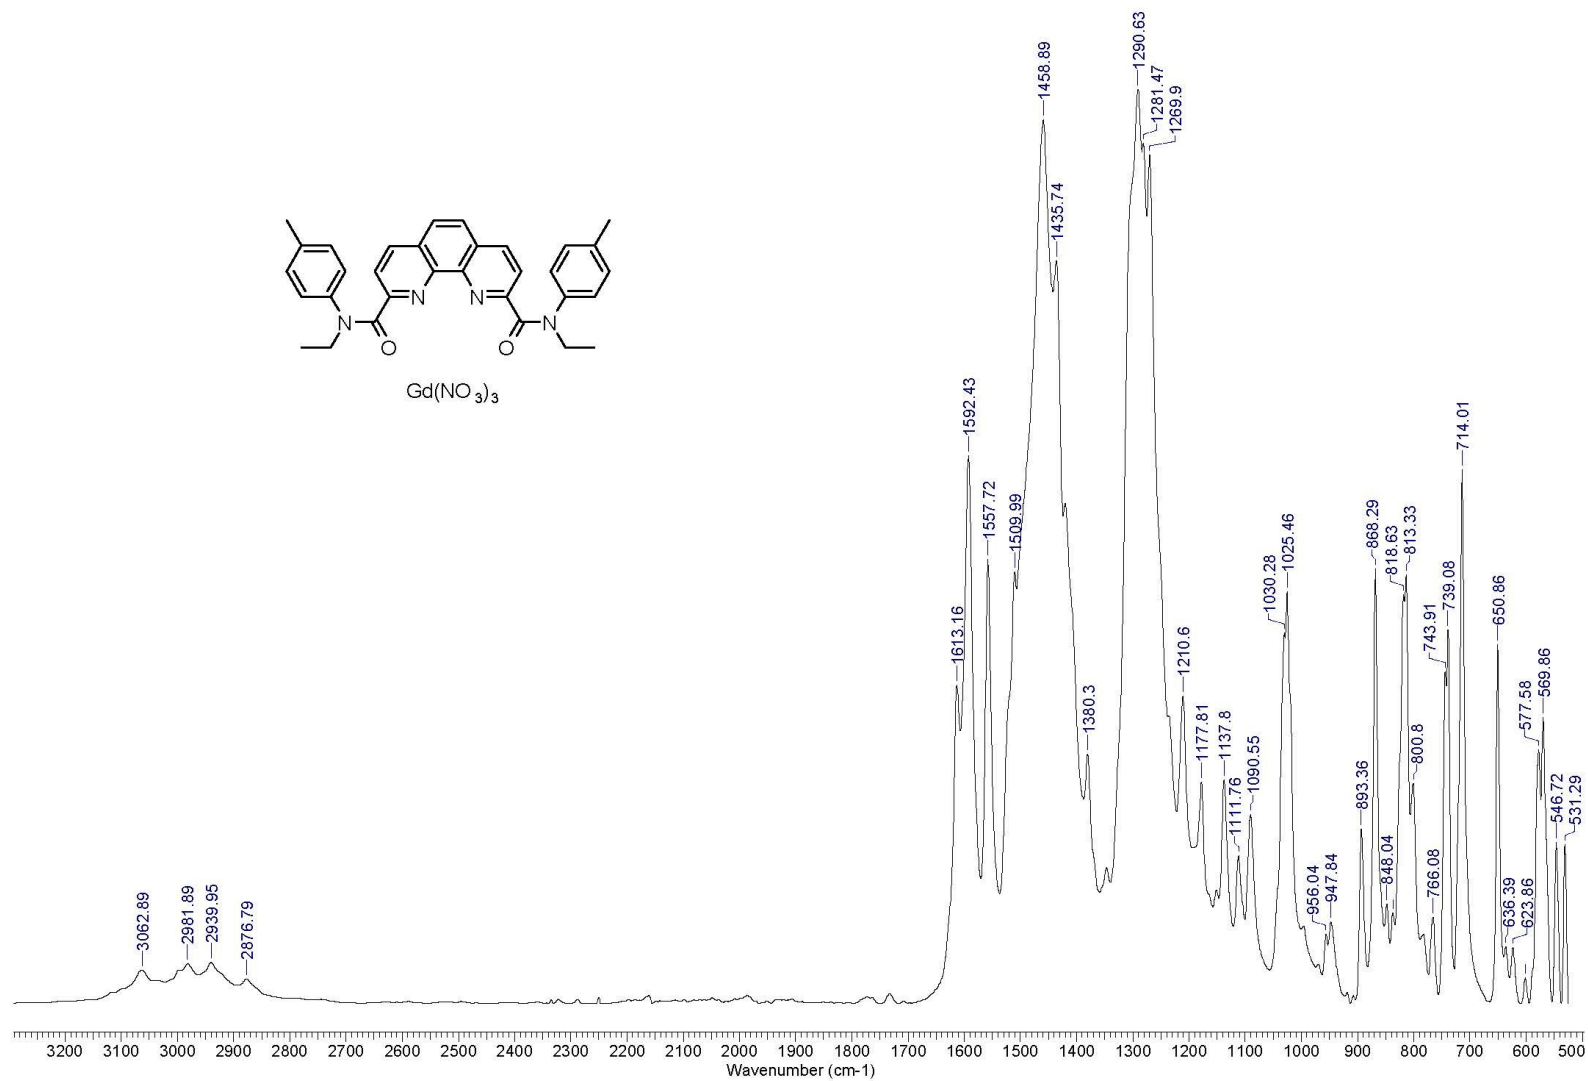

Figure S9. Solid-state IR spectrum at 25°C

*N*<sup>2</sup>,*N*<sup>9</sup>-diethyl-*N*<sup>2</sup>,*N*<sup>9</sup>-di-*p*-tolyl-1,10-phenanthroline-2,9-dicarboxamide terbium trinitrate LH•Tb(NO<sub>3</sub>)<sub>3</sub>

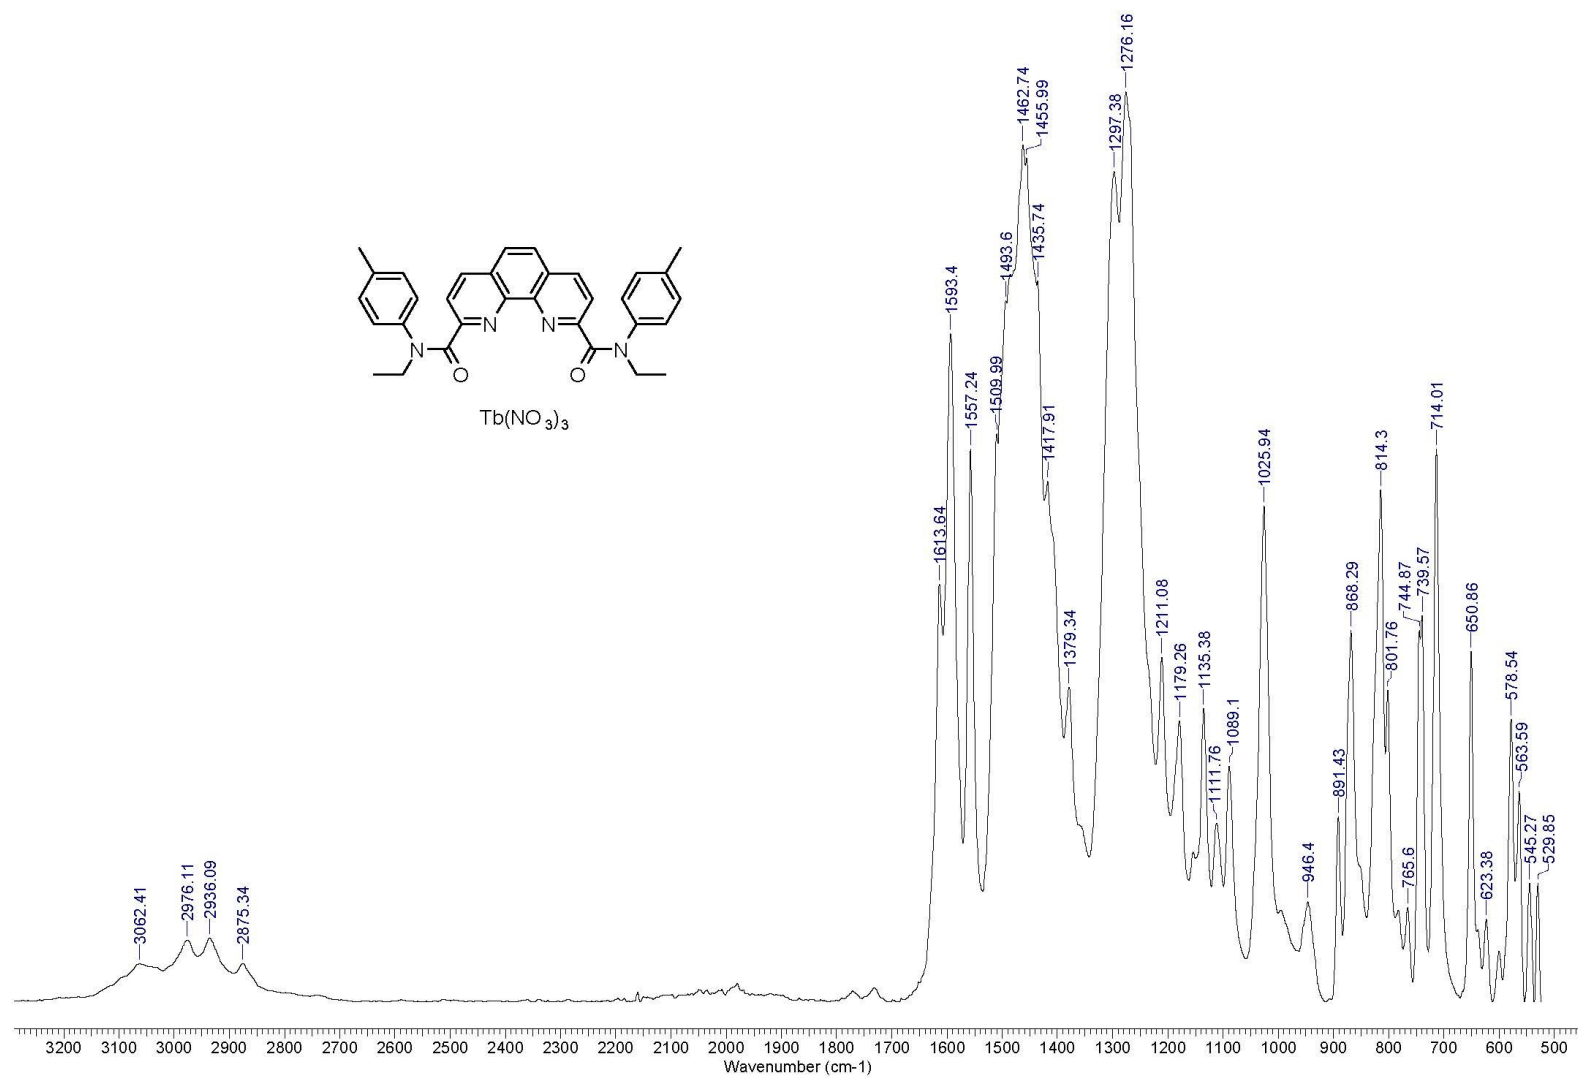

**Figure S10.** Solid-state IR spectrum at 25°C

4,7-dichloro-*N*<sup>2</sup>,*N*<sup>9</sup>-diethyl-*N*<sup>2</sup>,*N*<sup>9</sup>-di-*p*-tolyl-1,10-phenanthroline-2,9-dicarboxamide europium trinitrate  $\text{LCl} \cdot \text{Eu}(\text{NO}_3)_3$

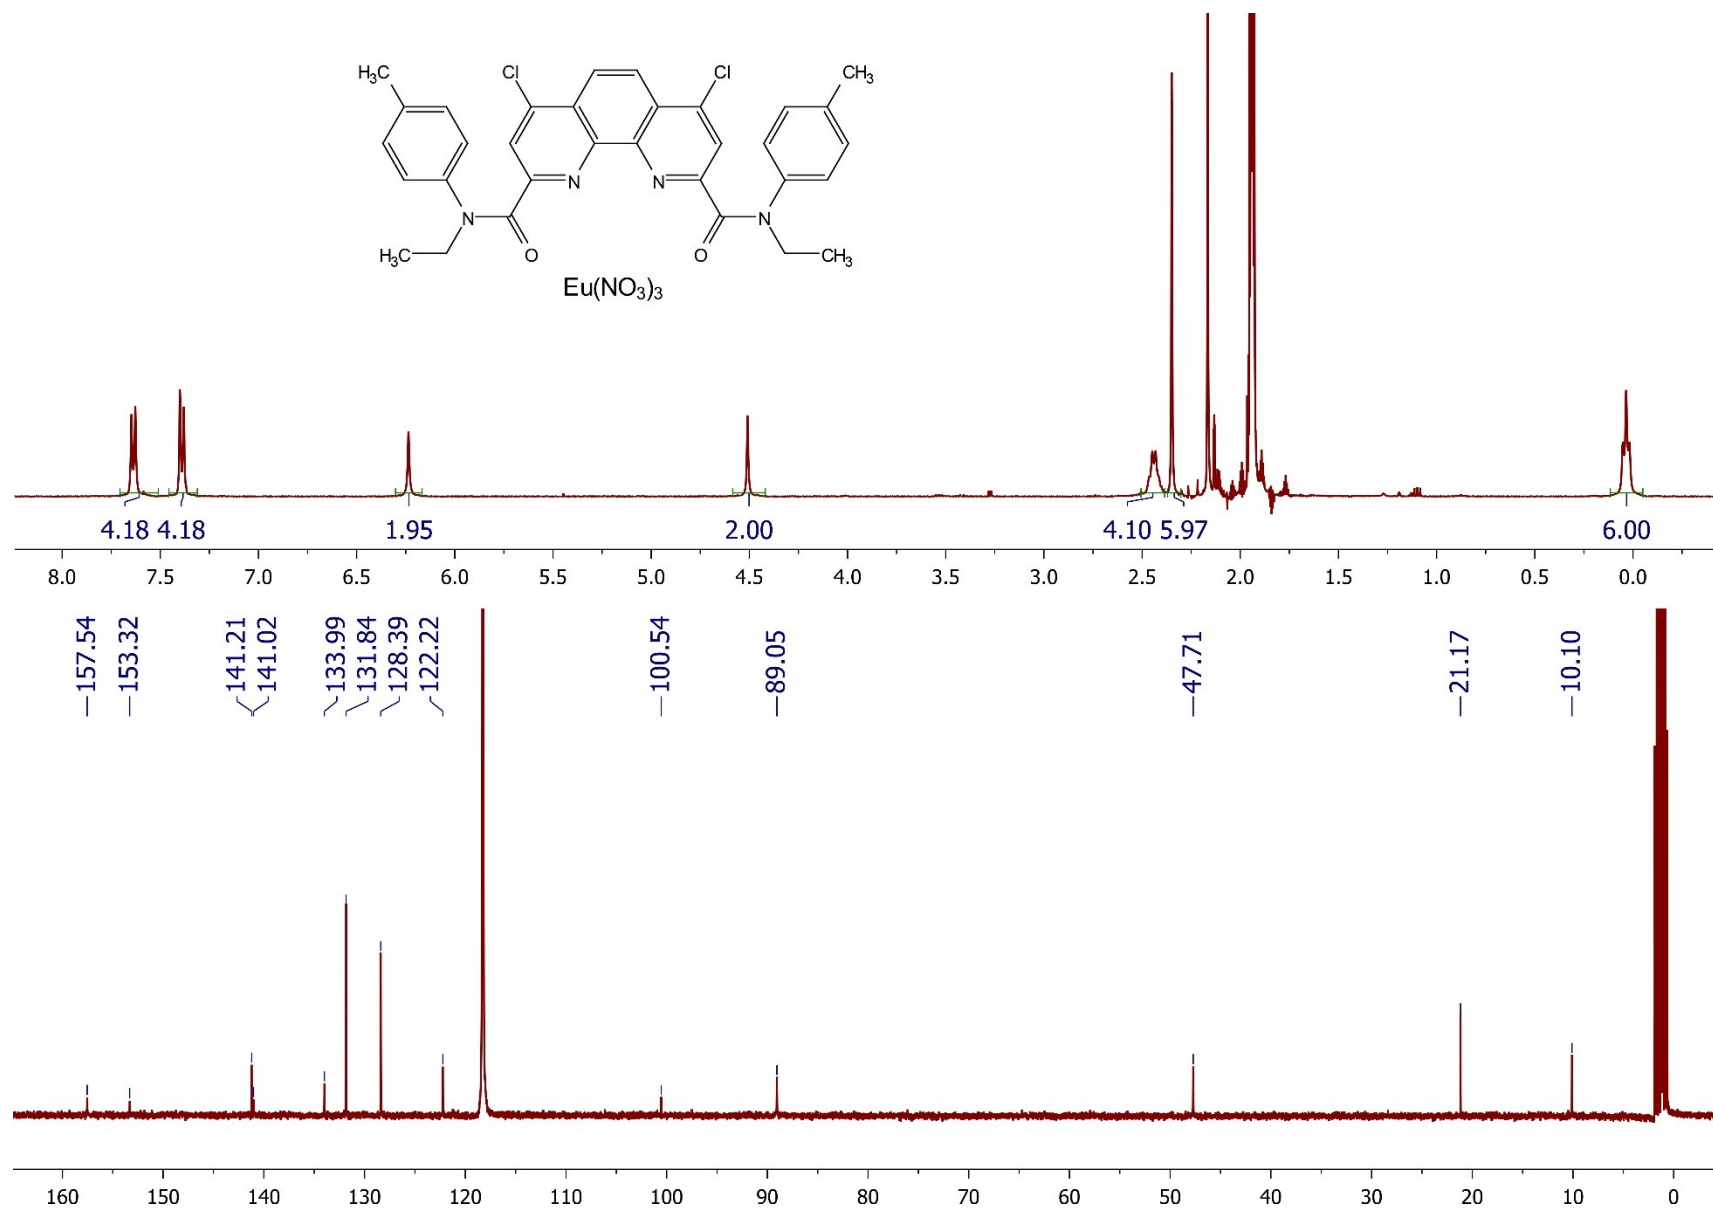

Figure S11. <sup>1</sup>H and <sup>13</sup>C NMR spectra in CD<sub>3</sub>CN at 25°C

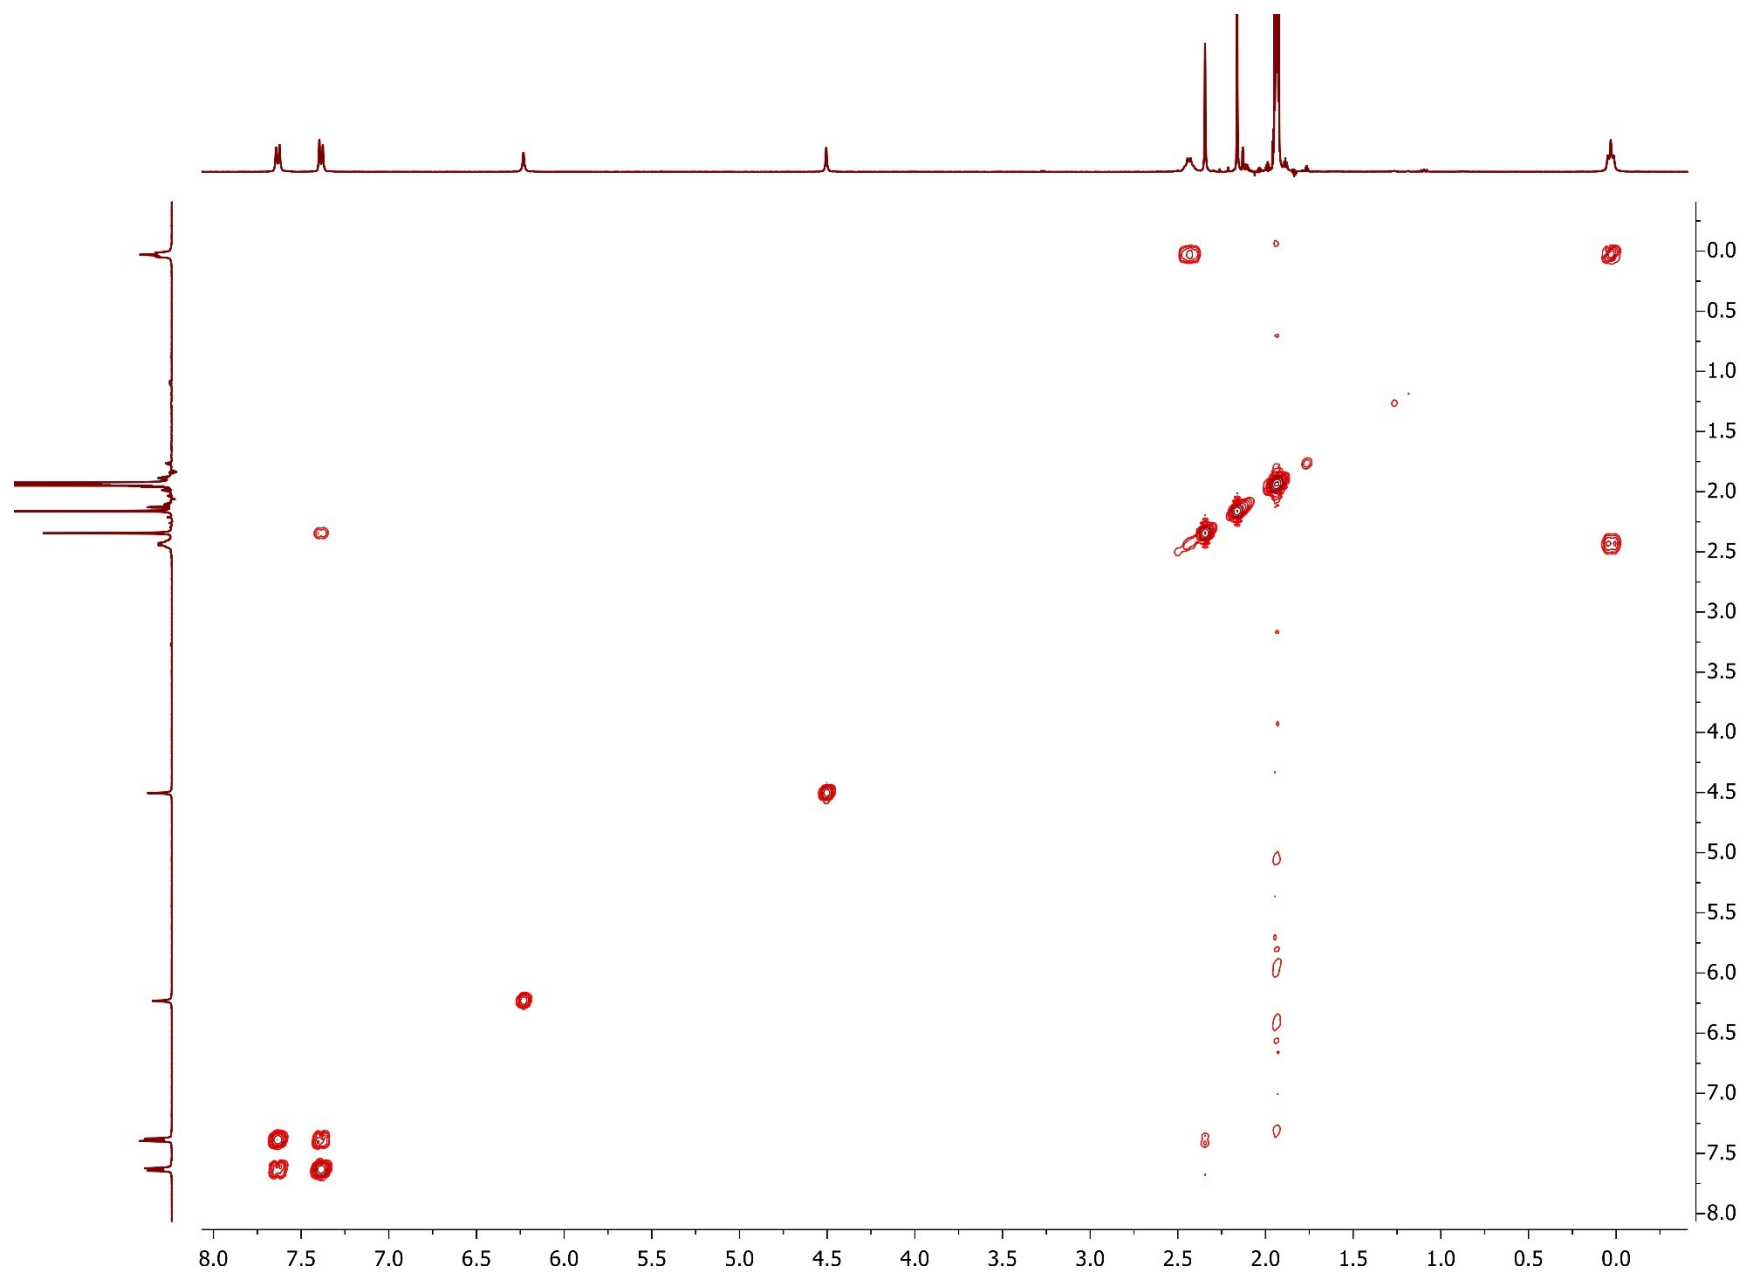

Figure S12.  $^1\text{H}/^1\text{H}$  COSY NMR spectra in  $\text{CD}_3\text{CN}$  at  $25^\circ\text{C}$

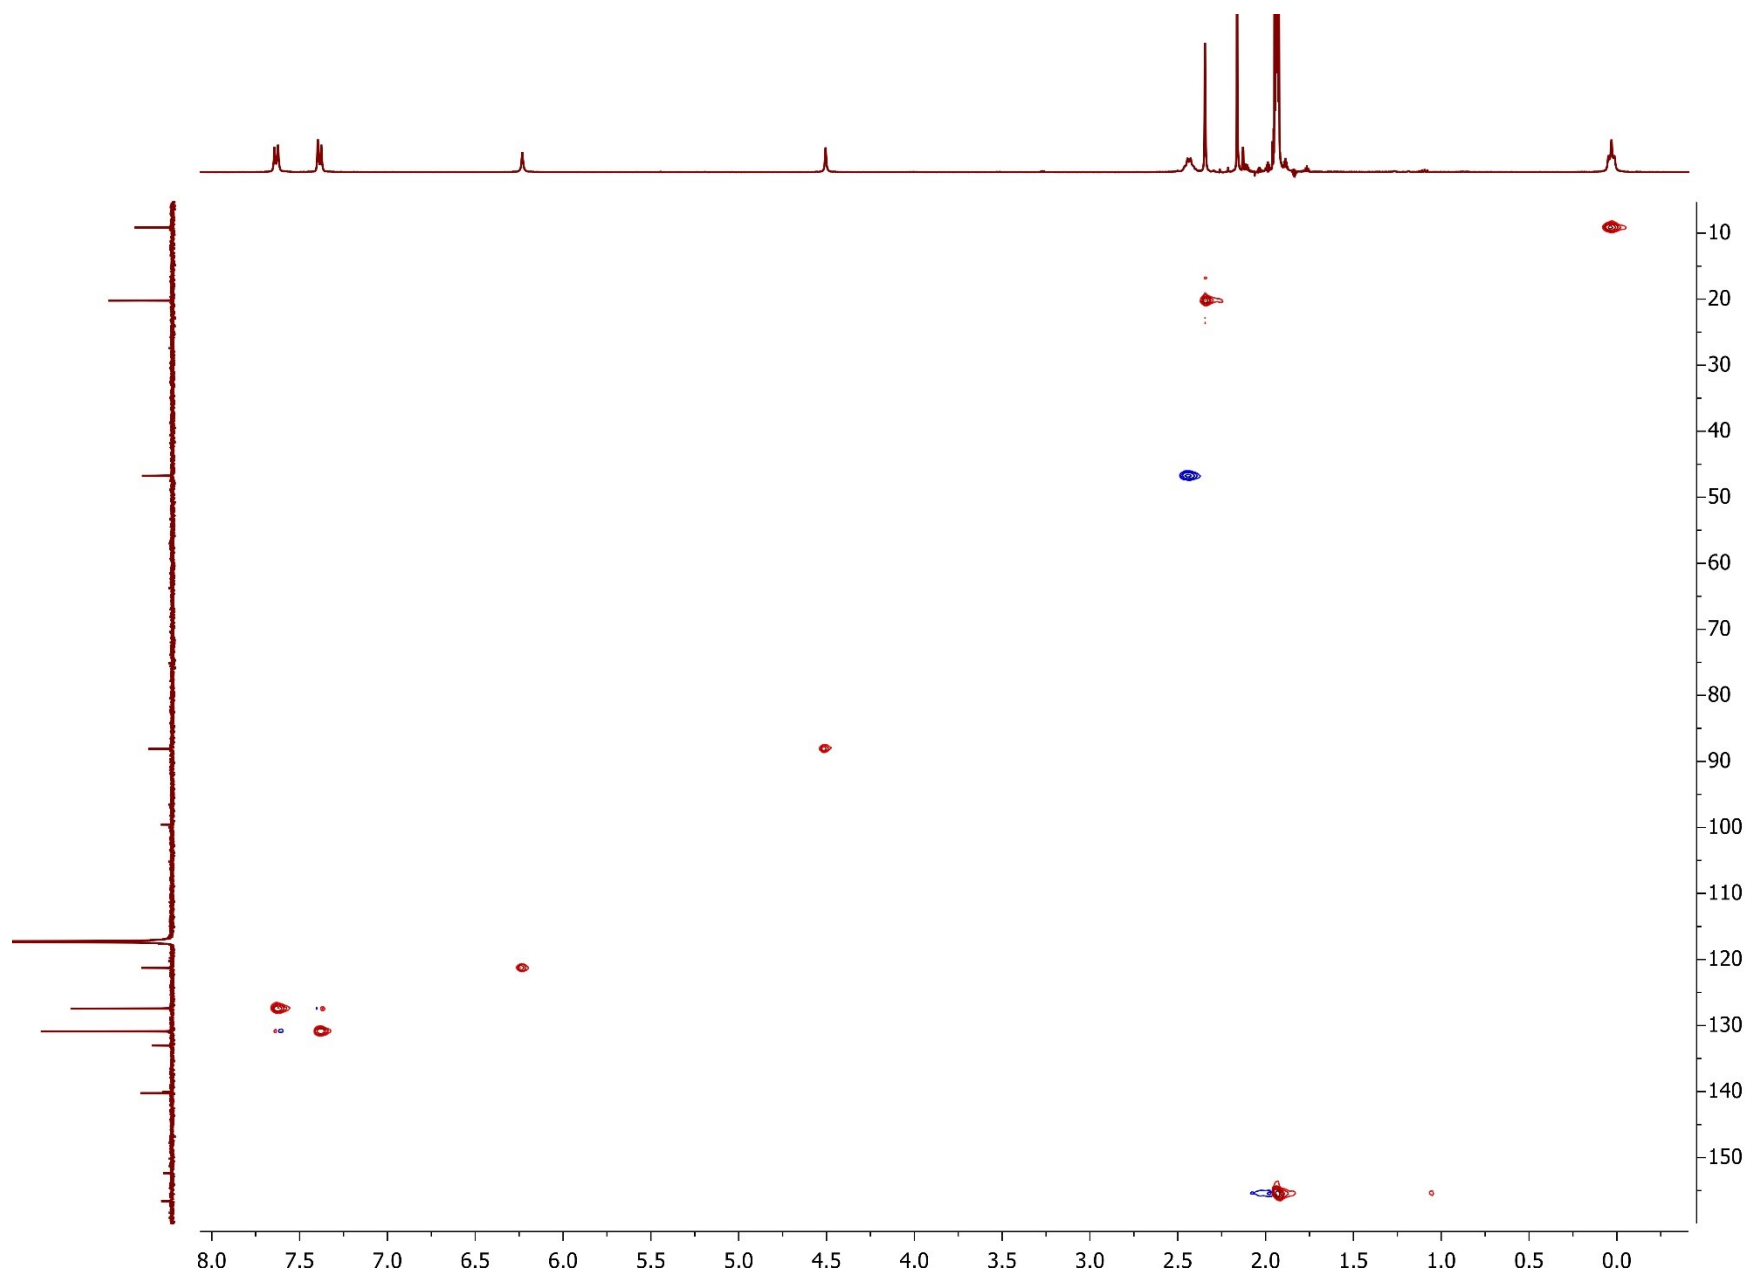

Figure S13.  $^1\text{H}/^{13}\text{C}$  HSQC NMR spectra in  $\text{CD}_3\text{CN}$  at 25°C

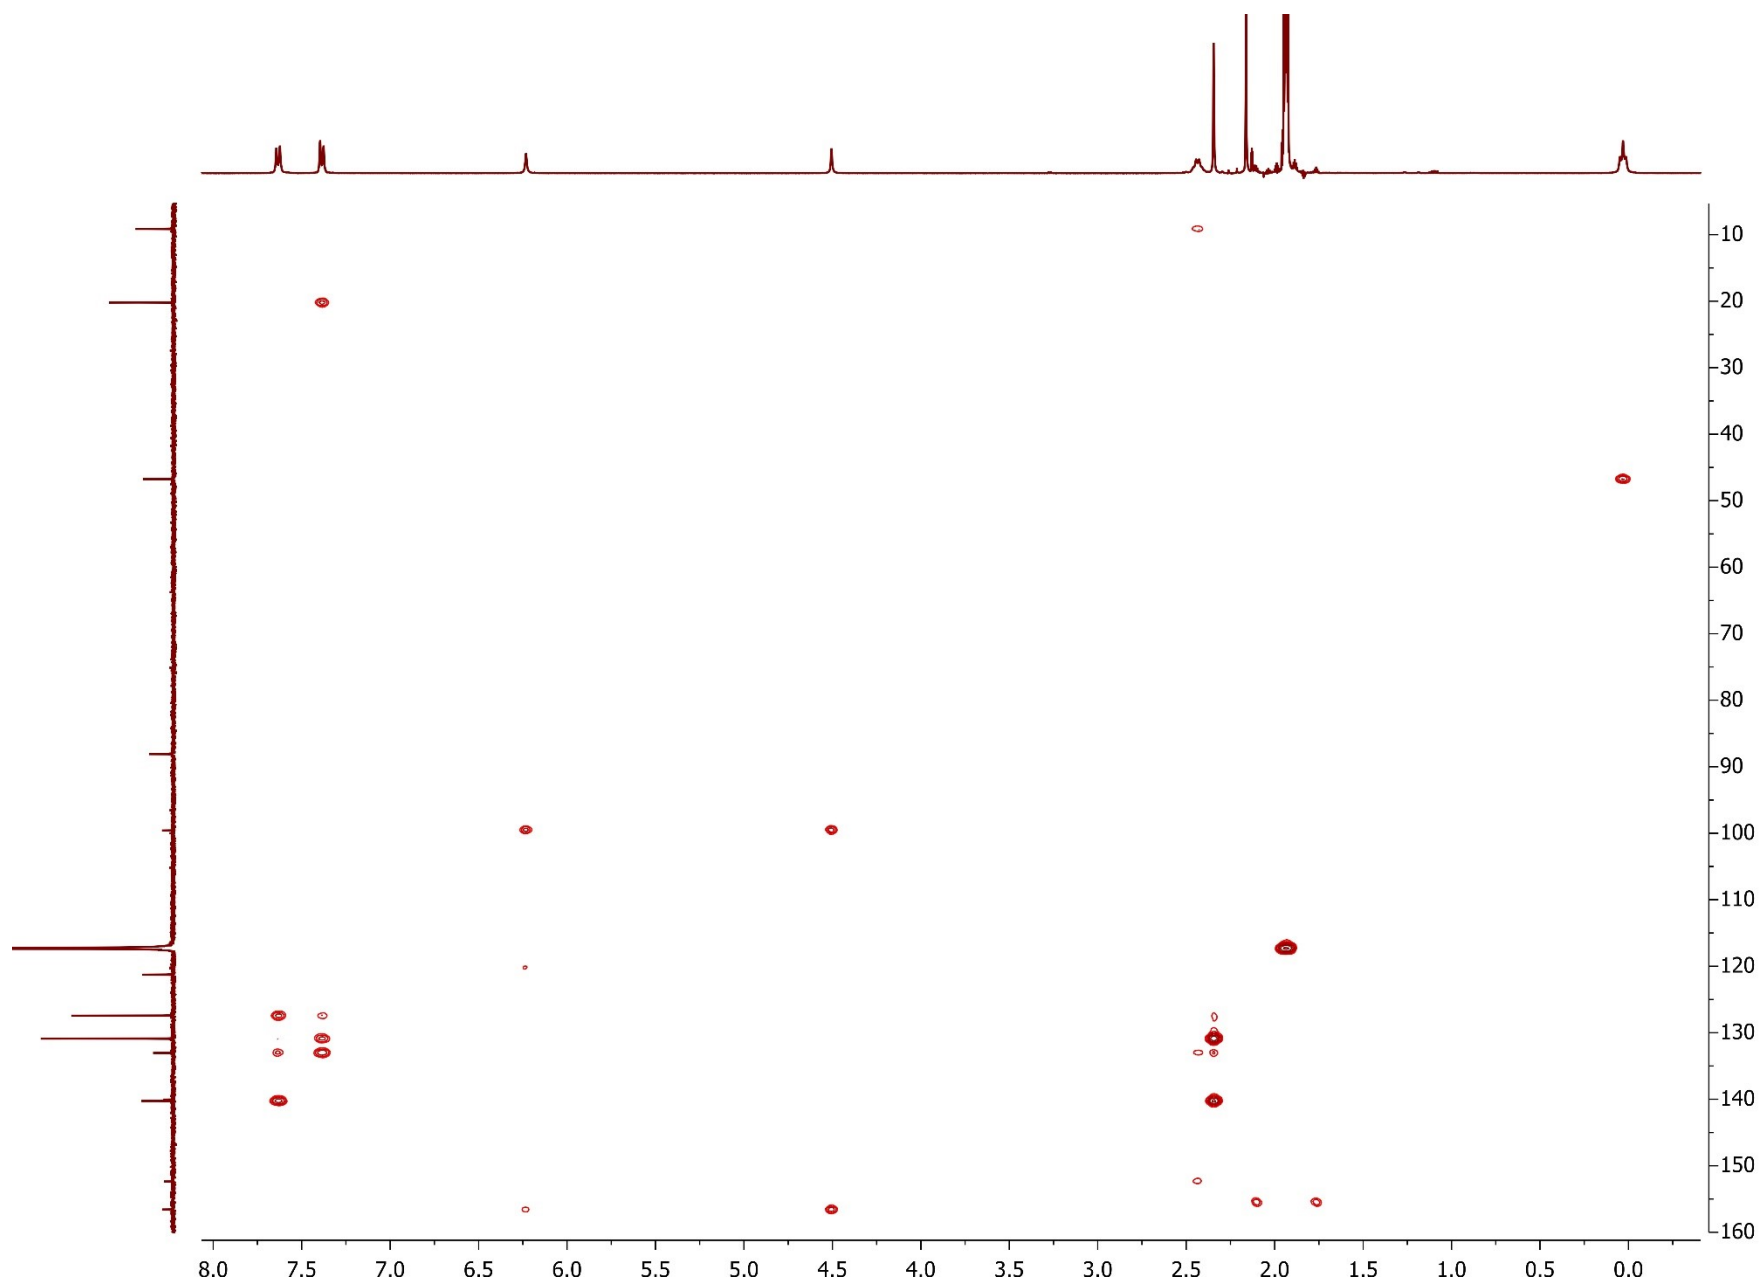

Figure S14.  $^1\text{H}/^{13}\text{C}$  HMBC NMR spectra in  $\text{CD}_3\text{CN}$  at  $25^\circ\text{C}$

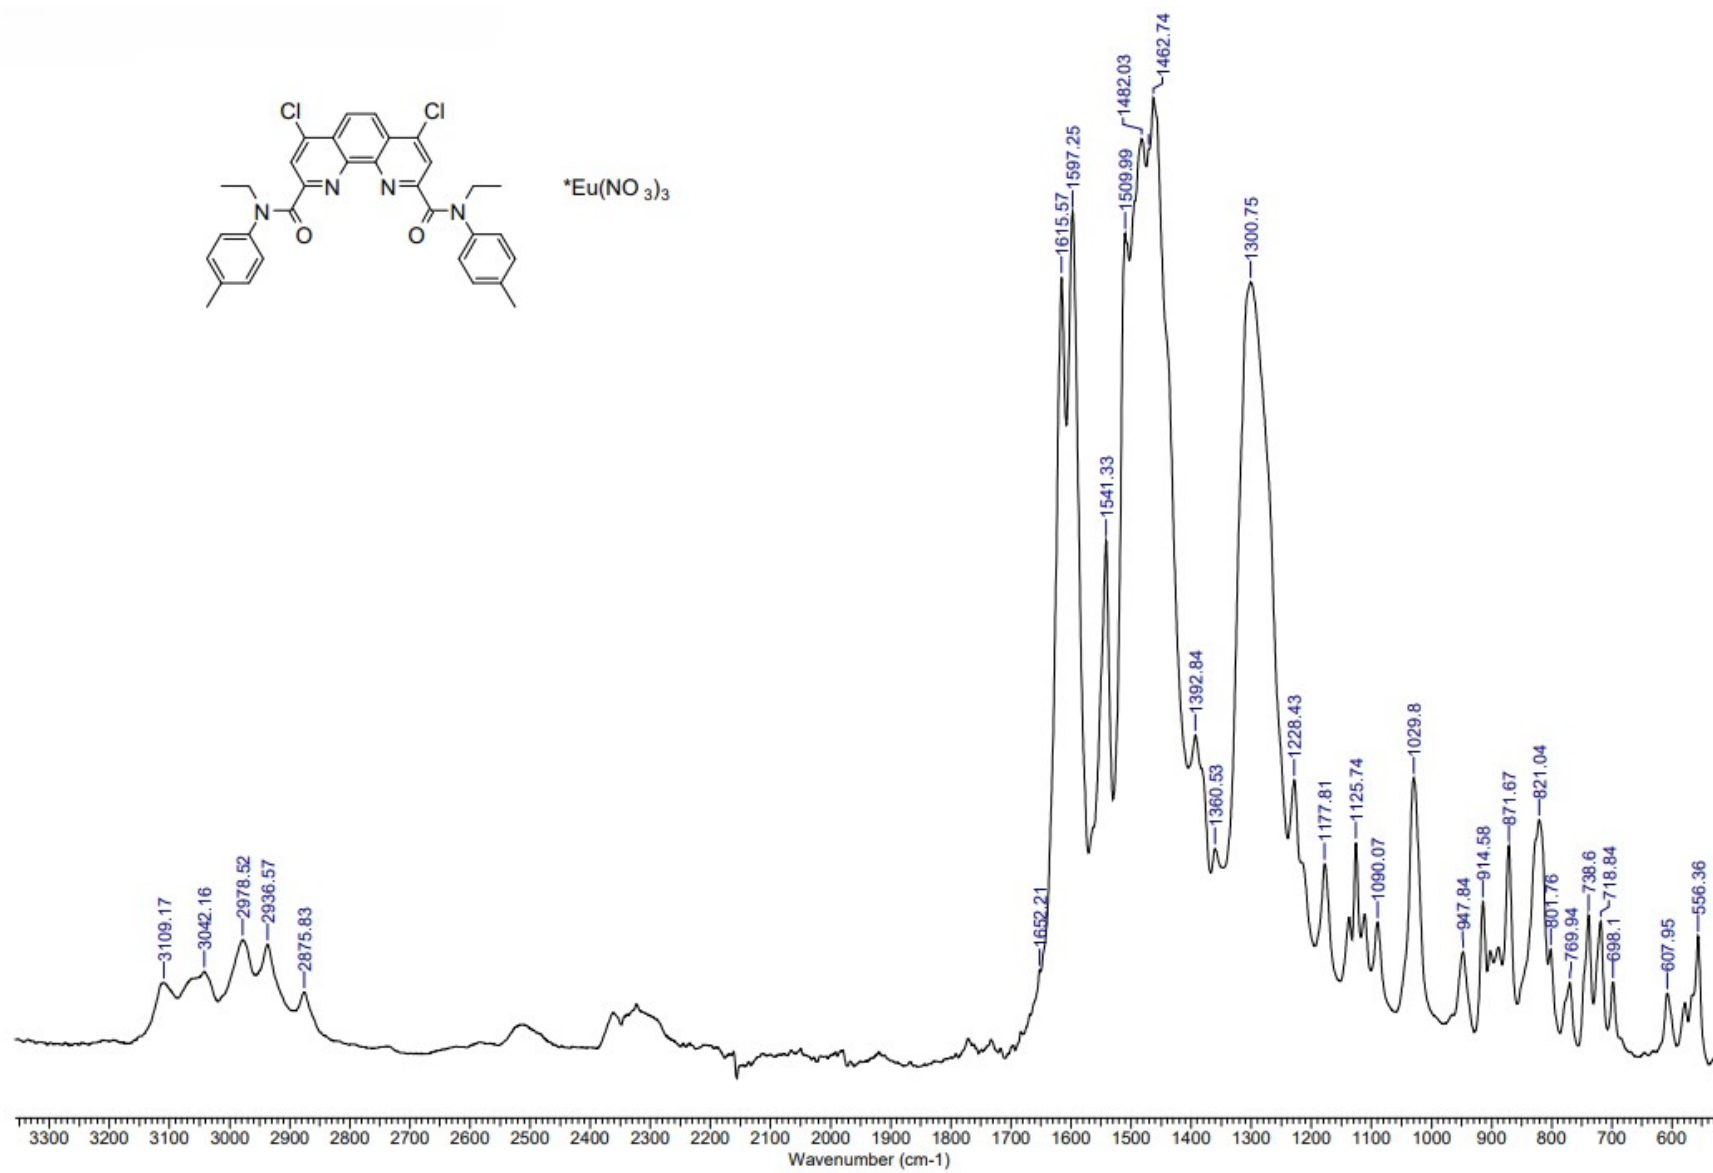

Figure S15. Solid-state IR spectrum at 25°C



4,7-dichloro-*N*<sup>2</sup>,*N*<sup>9</sup>-diethyl-*N*<sup>2</sup>,*N*<sup>9</sup>-di-*p*-tolyl-1,10-phenanthroline-2,9-dicarboxamide gadolinium trinitrate  $\text{LiCl} \cdot \text{Gd}(\text{NO}_3)_3$

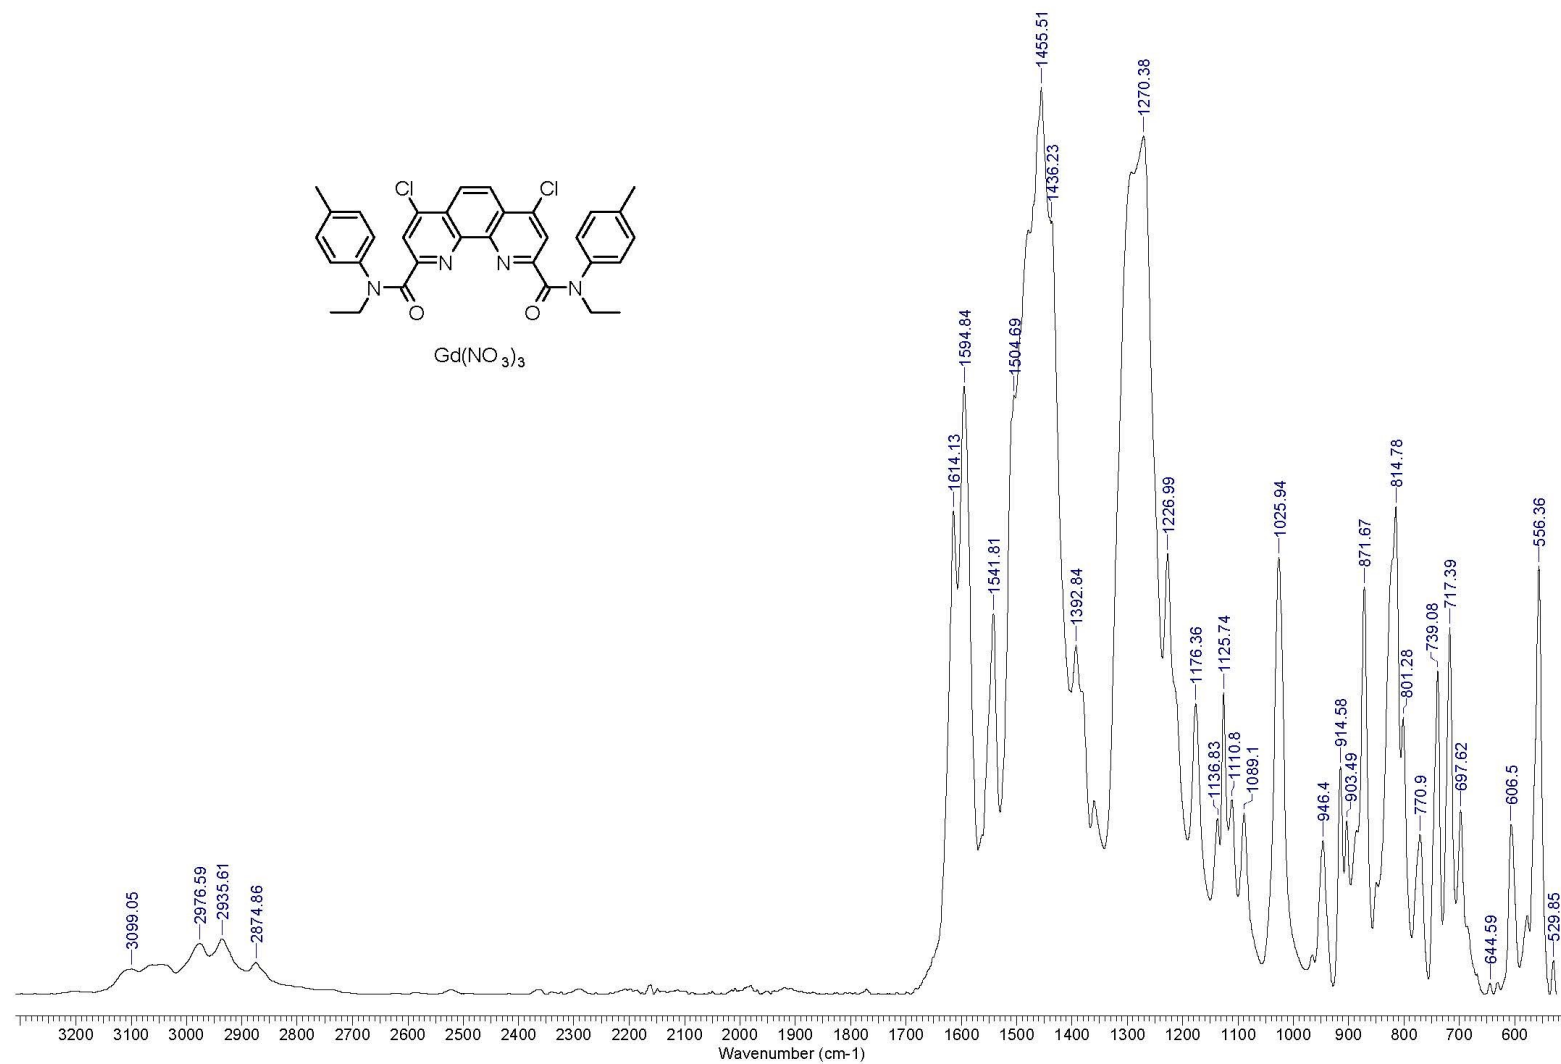

Figure S16. Solid-state IR spectrum at 25°C

4,7-dichloro- $N^2,N^9$ -diethyl- $N^2,N^9$ -di-*p*-tolyl-1,10-phenanthroline-2,9-dicarboxamide terbium trinitrate  $\text{LCI}\cdot\text{Tb}(\text{NO}_3)_3$

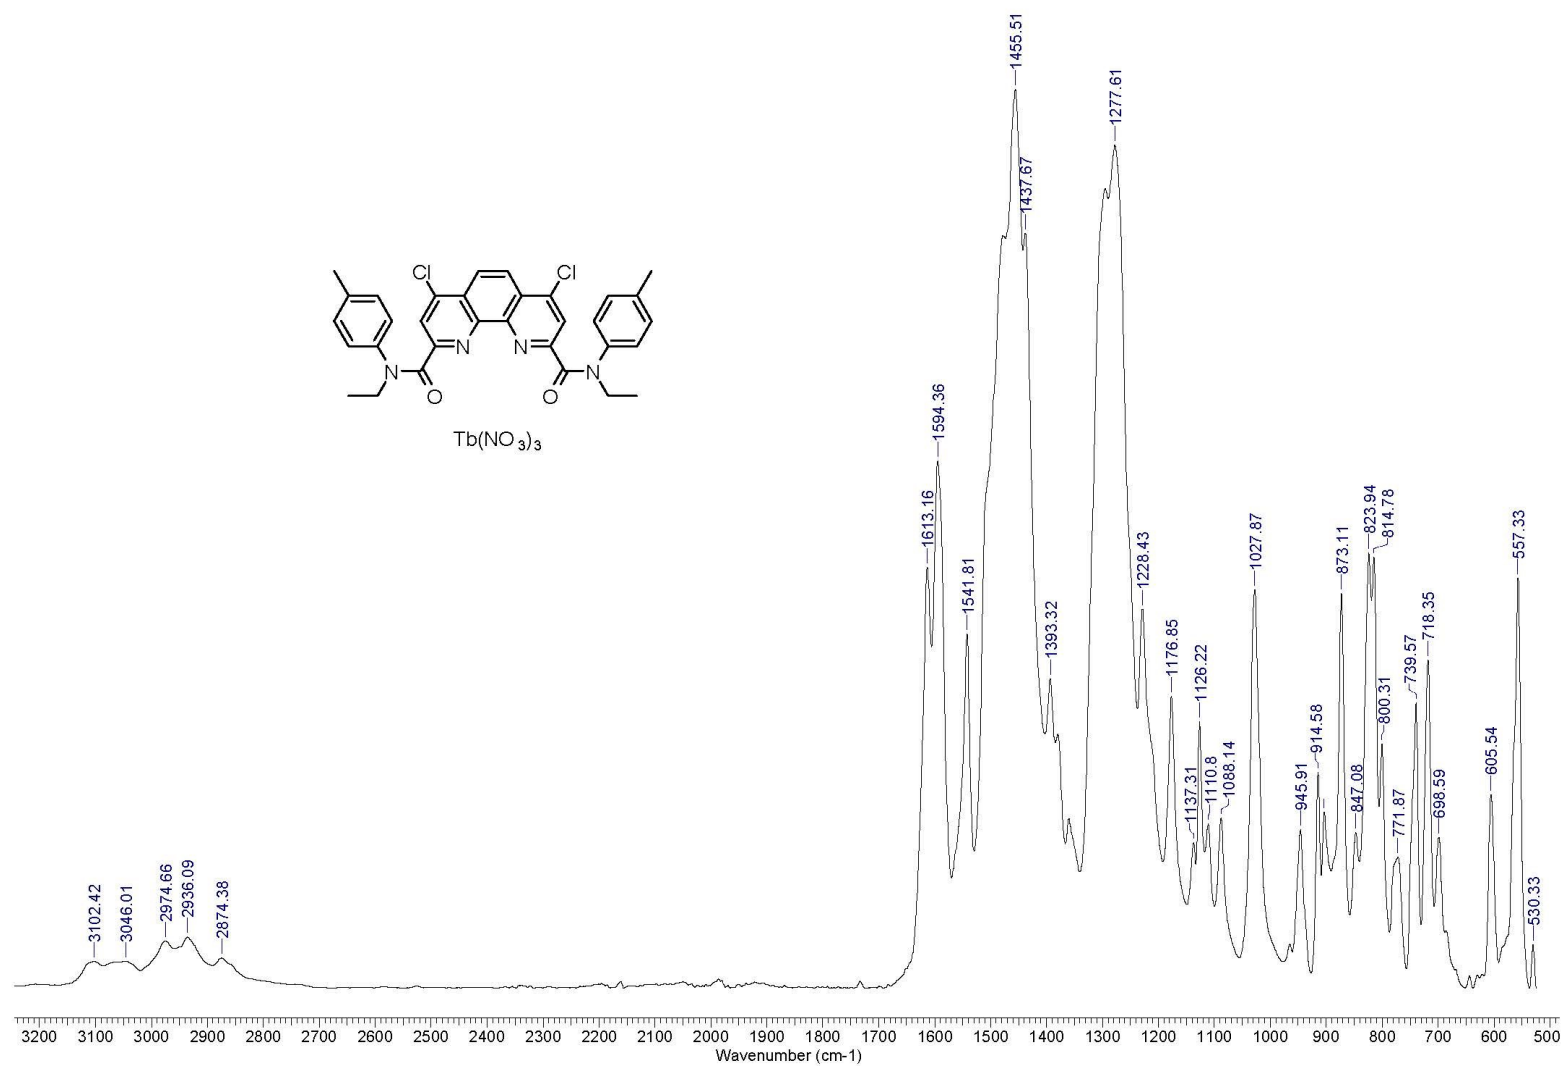

Figure S17. Solid-state IR spectrum at 25°C

*N*<sup>2</sup>,*N*<sup>9</sup>-diethyl-4,7-difluoro-*N*<sup>2</sup>,*N*<sup>9</sup>-di-*p*-tolyl-1,10-phenanthroline-2,9-dicarboxamide europium trinitrate LF•Eu(NO<sub>3</sub>)<sub>3</sub>

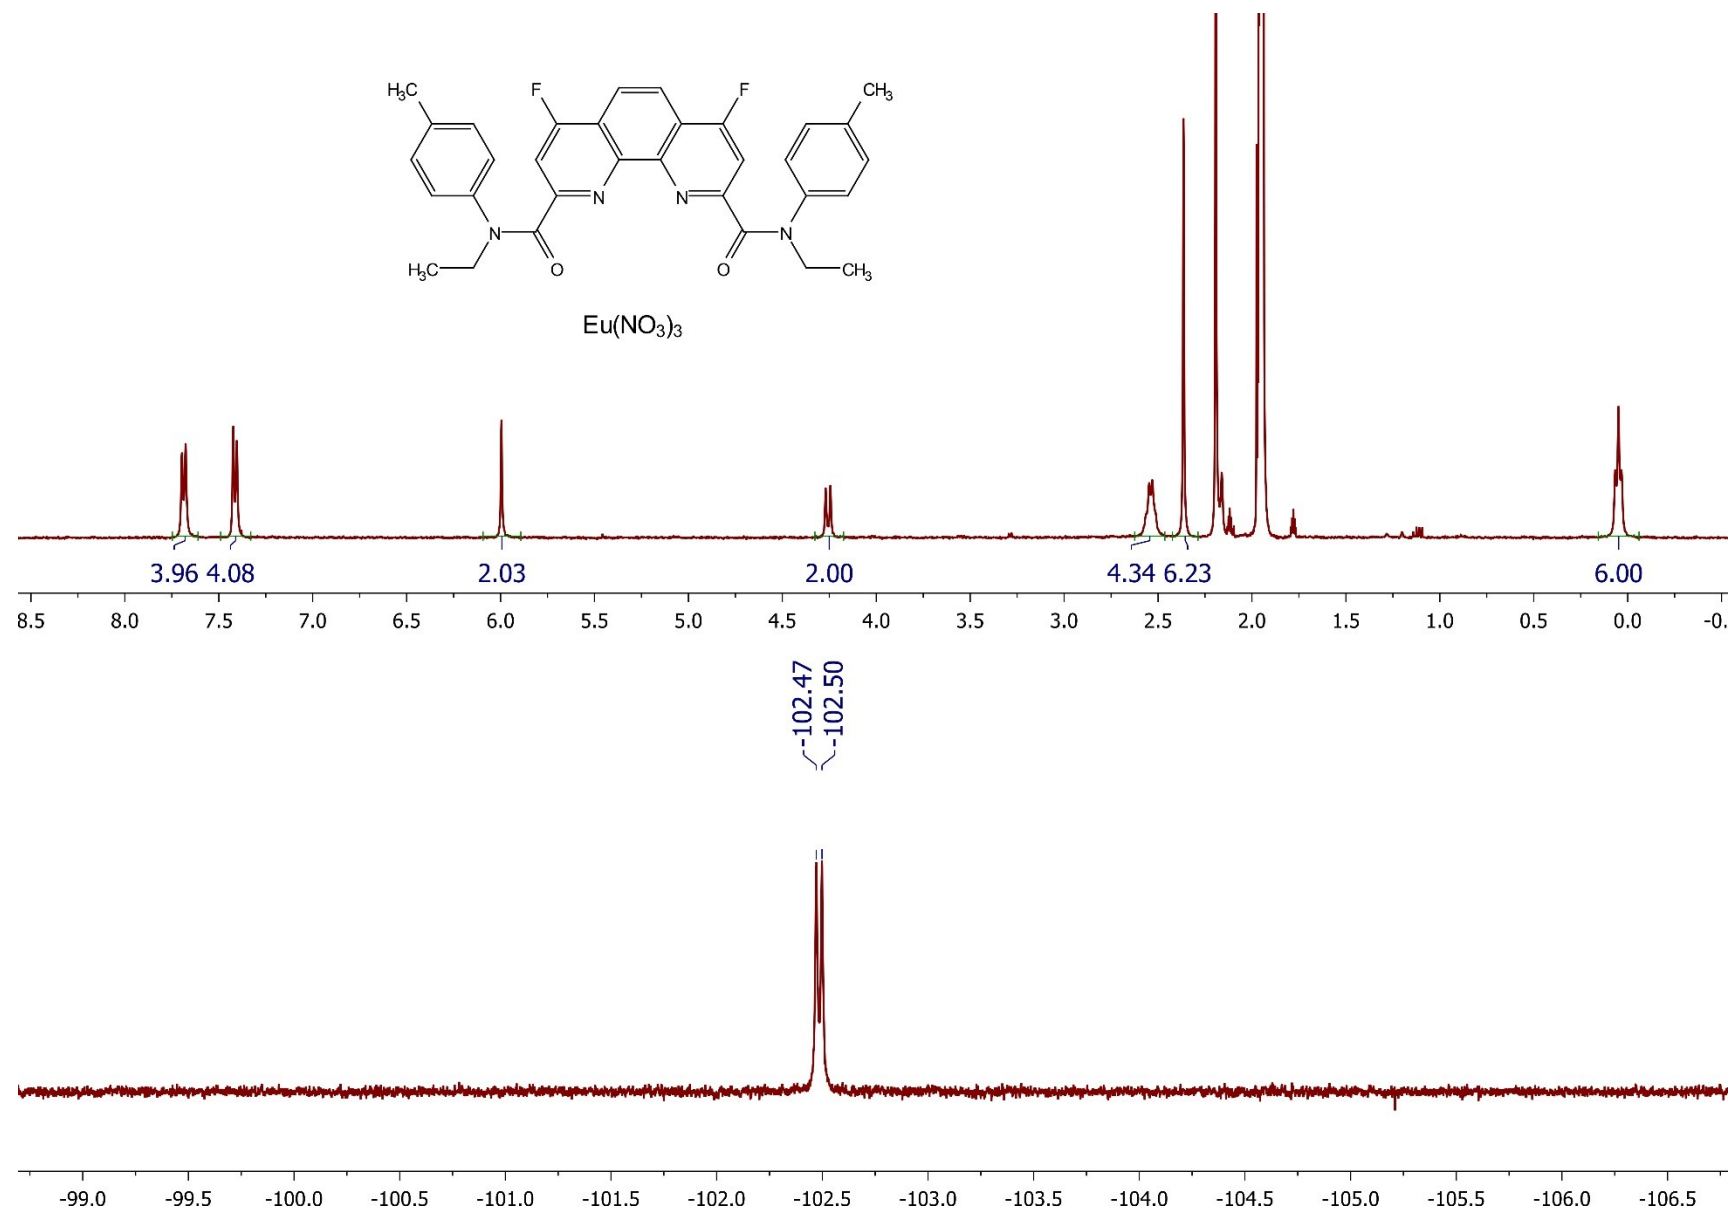

Figure S18. <sup>1</sup>H and <sup>19</sup>F NMR spectra in CD<sub>3</sub>CN at 25°C

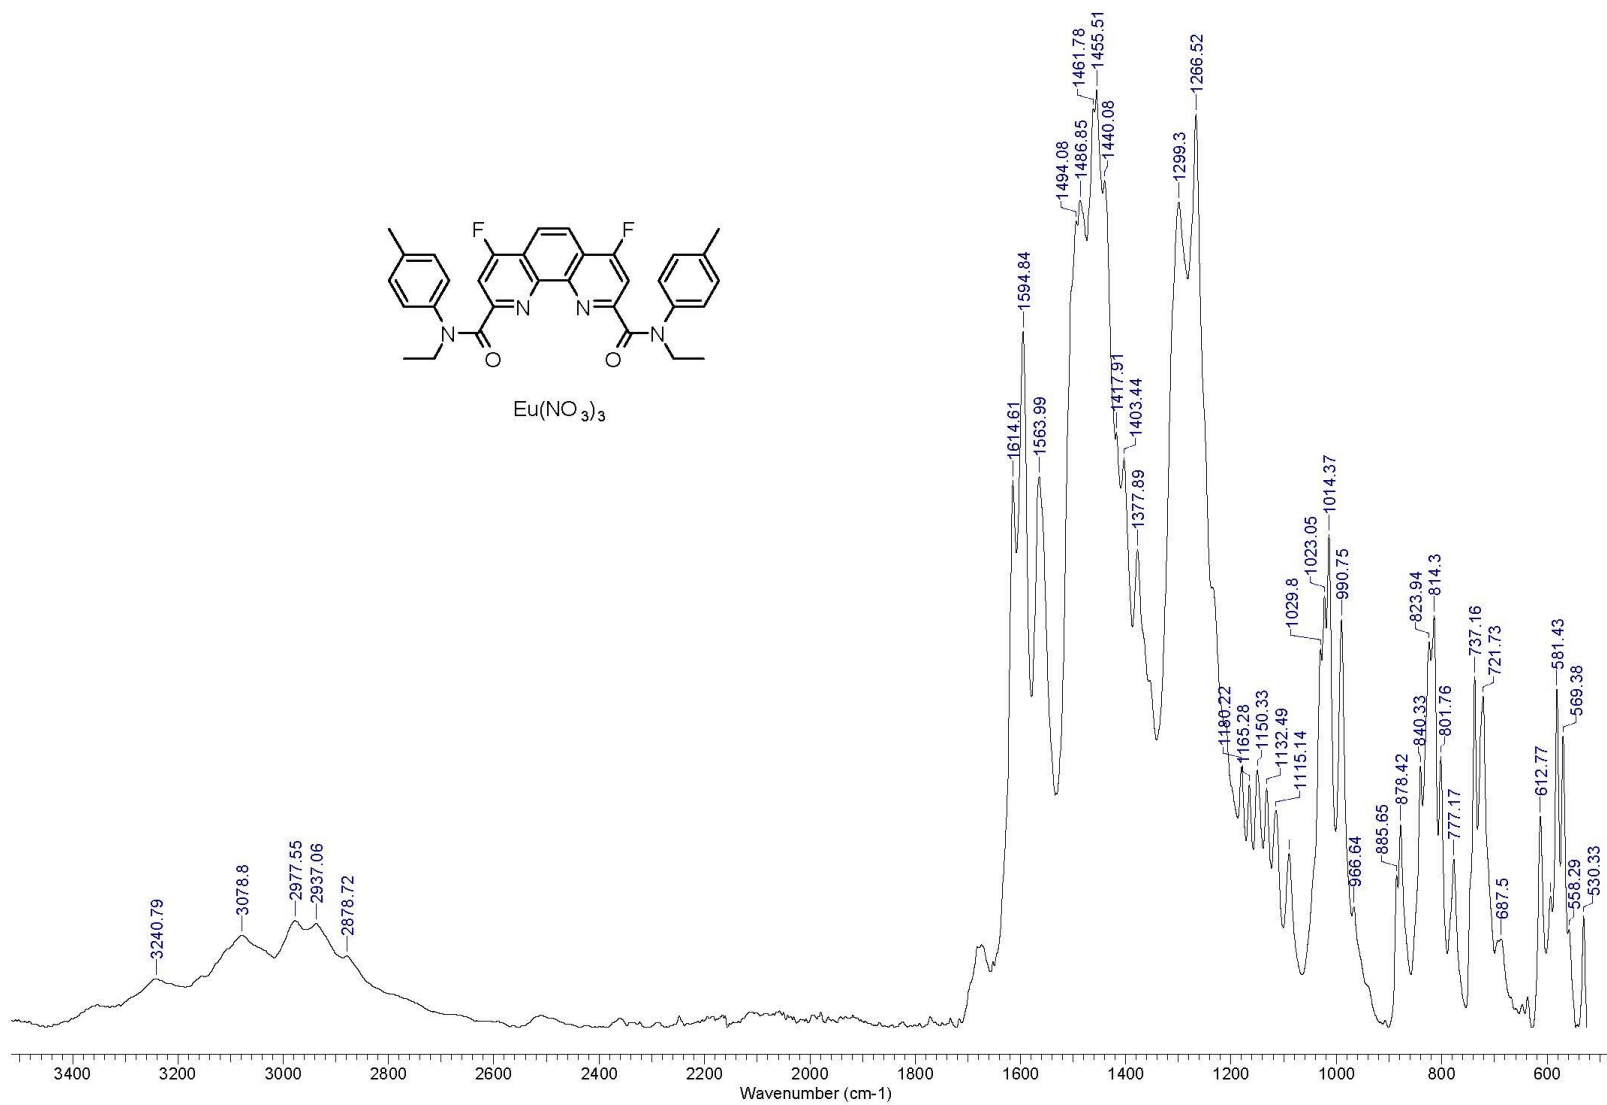

Figure S19. Solid-state IR spectrum at 25°C

*N*<sup>2</sup>,*N*<sup>9</sup>-diethyl-4,7-difluoro-*N*<sup>2</sup>,*N*<sup>9</sup>-di-*p*-tolyl-1,10-phenanthroline-2,9-dicarboxamide gadolinium trinitrate LF•Gd(NO<sub>3</sub>)<sub>3</sub>

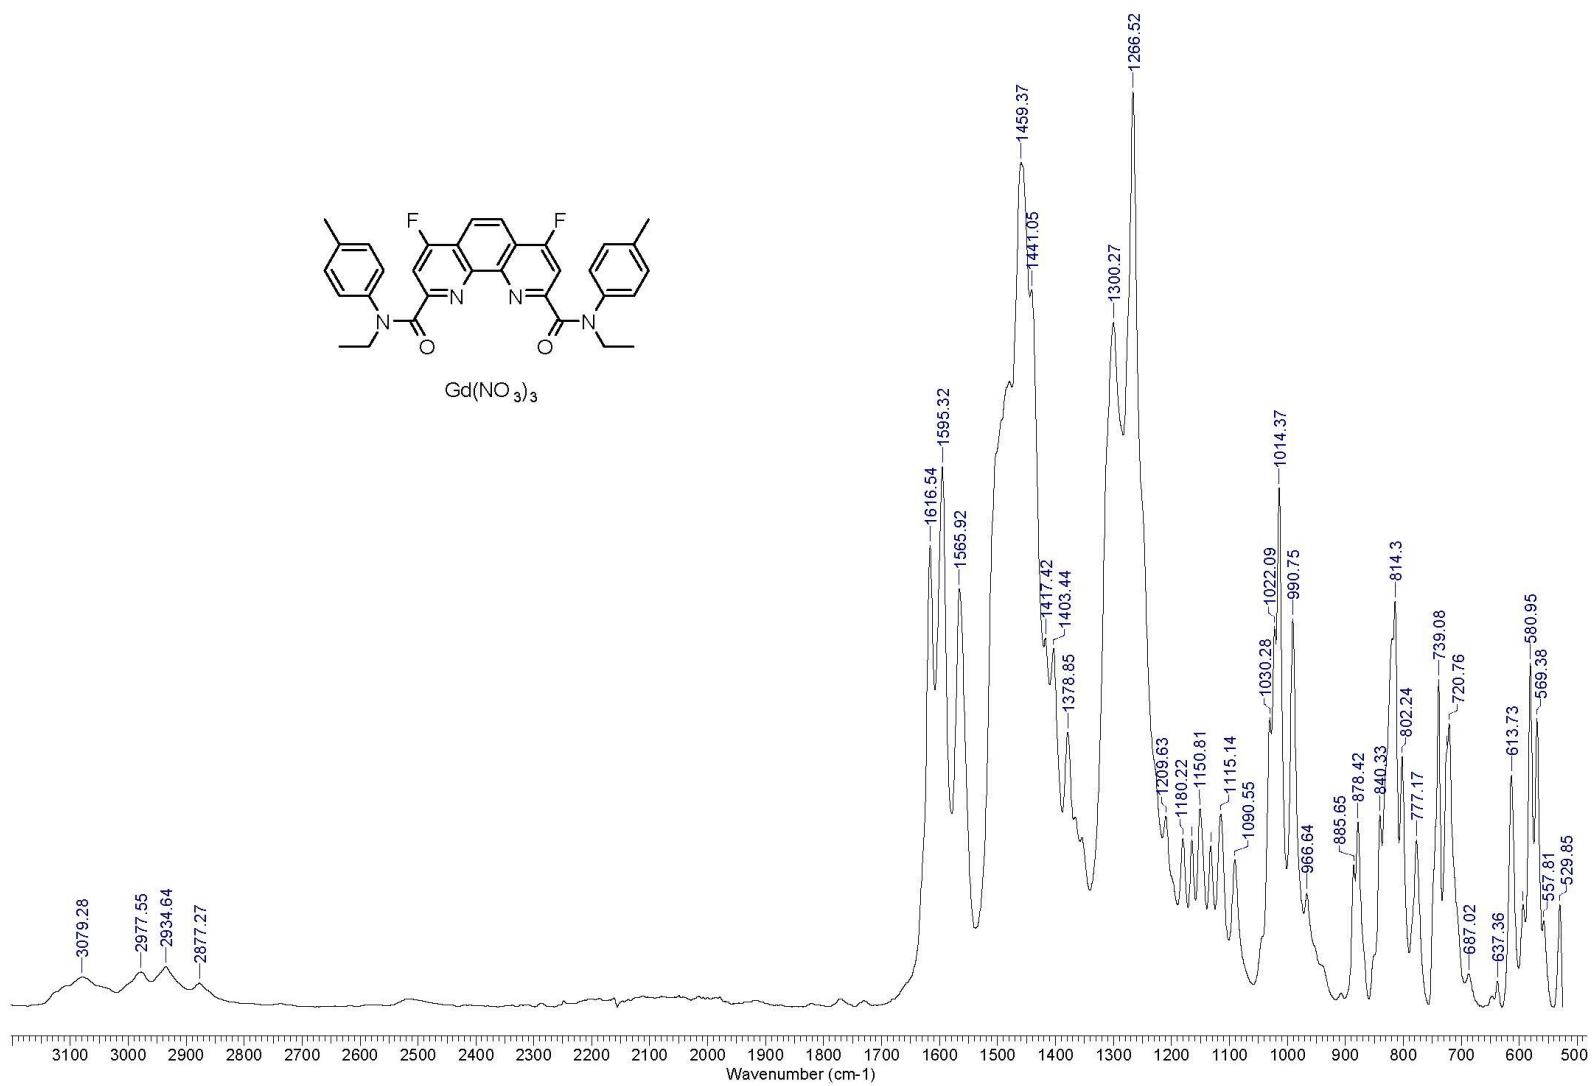

Figure S20. Solid-state IR spectrum at 25°C

*N*<sup>2</sup>,*N*<sup>9</sup>-diethyl-4,7-difluoro-*N*<sup>2</sup>,*N*<sup>9</sup>-di-*p*-tolyl-1,10-phenanthroline-2,9-dicarboxamide terbium trinitrate LF•Tb(NO<sub>3</sub>)<sub>3</sub>

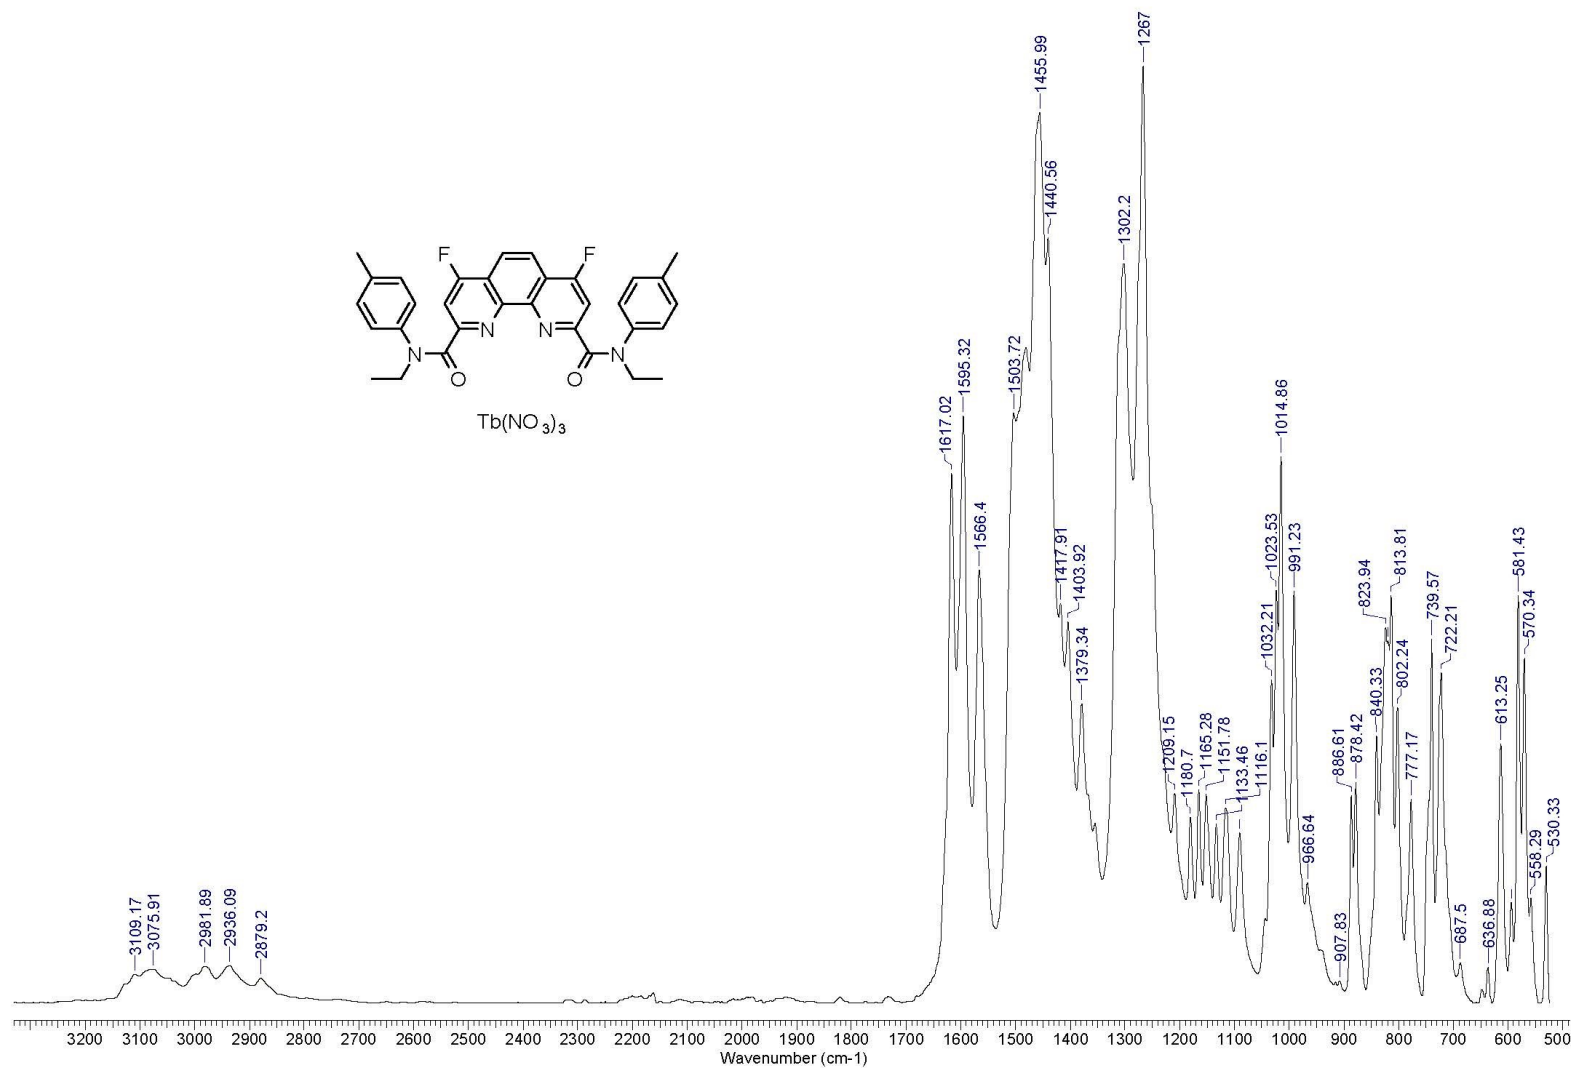

Figure S21. Solid-state IR spectrum at 25°C

***N*<sup>2</sup>,*N*<sup>9</sup>-diethyl-4-fluoro-7-hydroxy-*N*<sup>2</sup>,*N*<sup>9</sup>-di-*p*-tolyl-1,10-phenanthroline-2,9-dicarboxamide europium trinitrate LFOH•Eu(NO<sub>3</sub>)<sub>3</sub>**

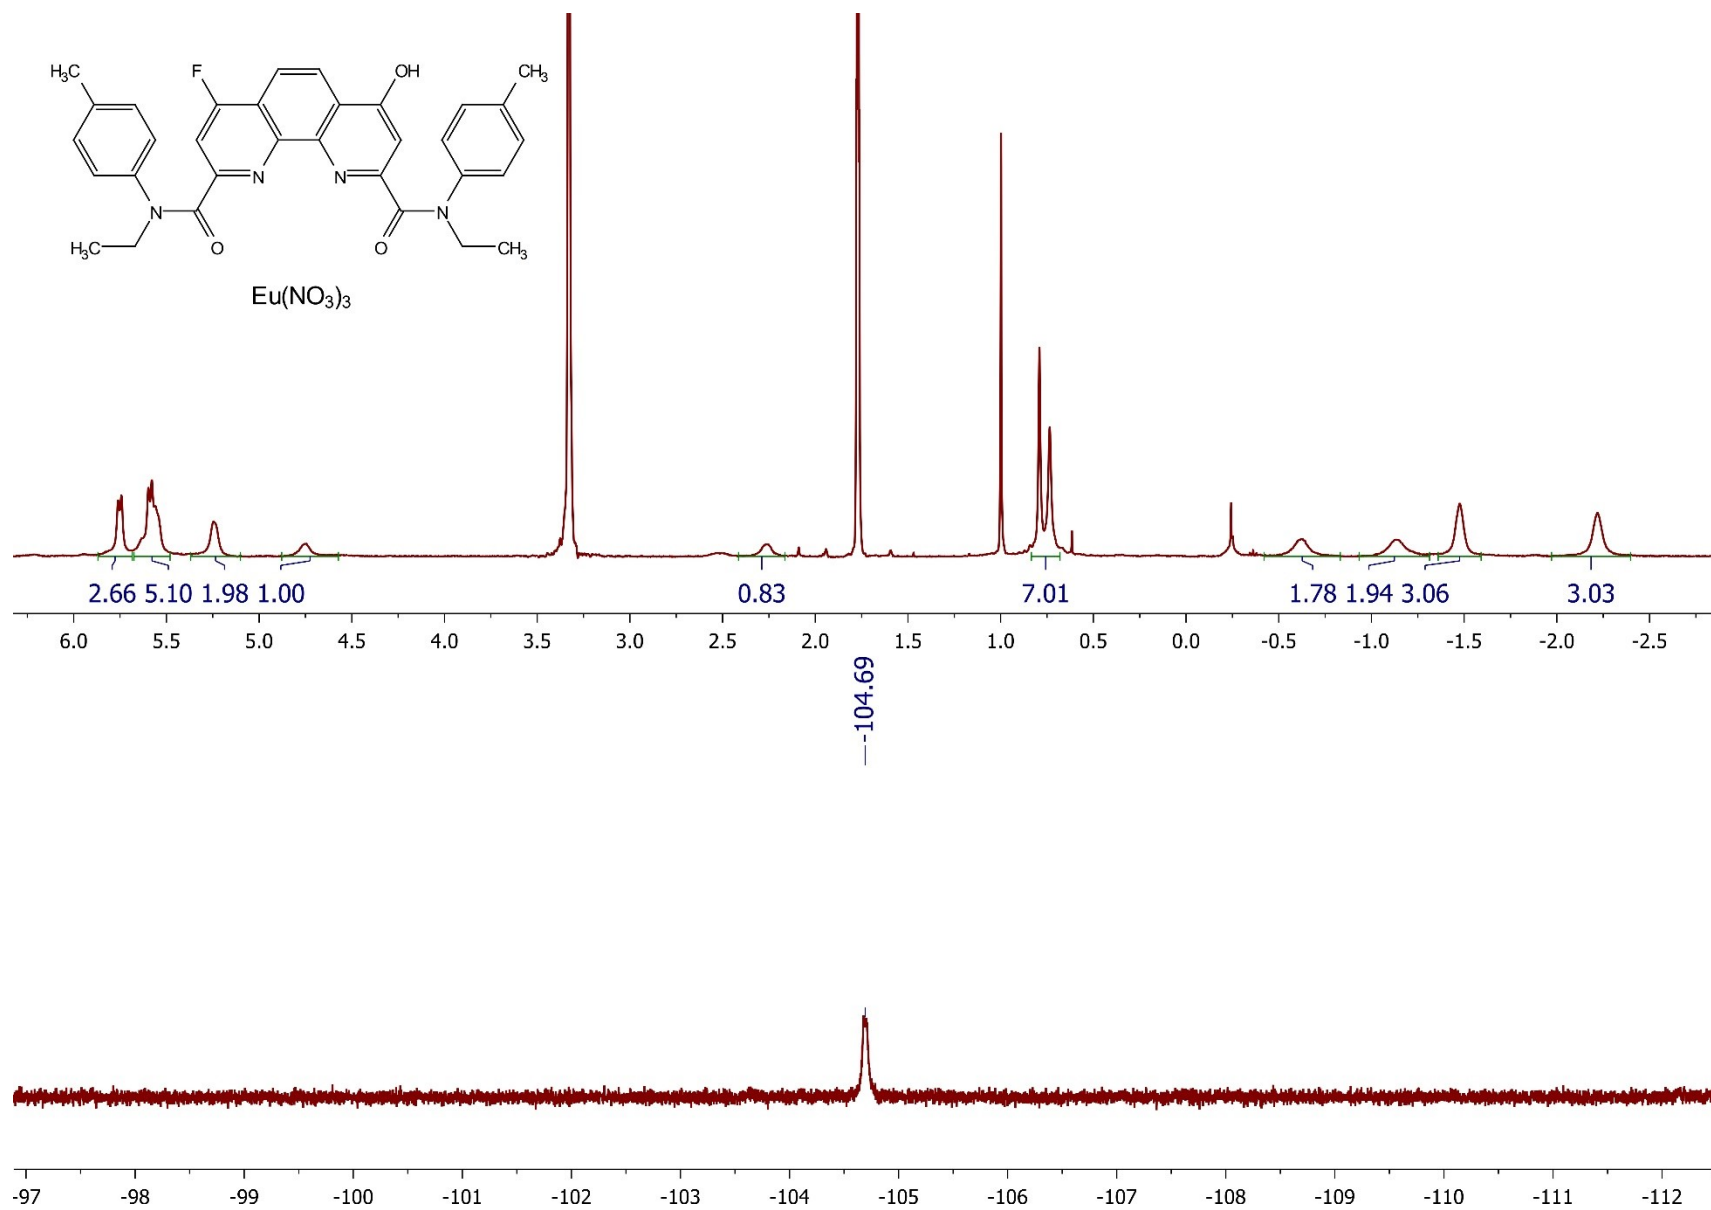

**Figure S22.** <sup>1</sup>H and <sup>19</sup>F NMR spectra in CD<sub>3</sub>OD at 25°C

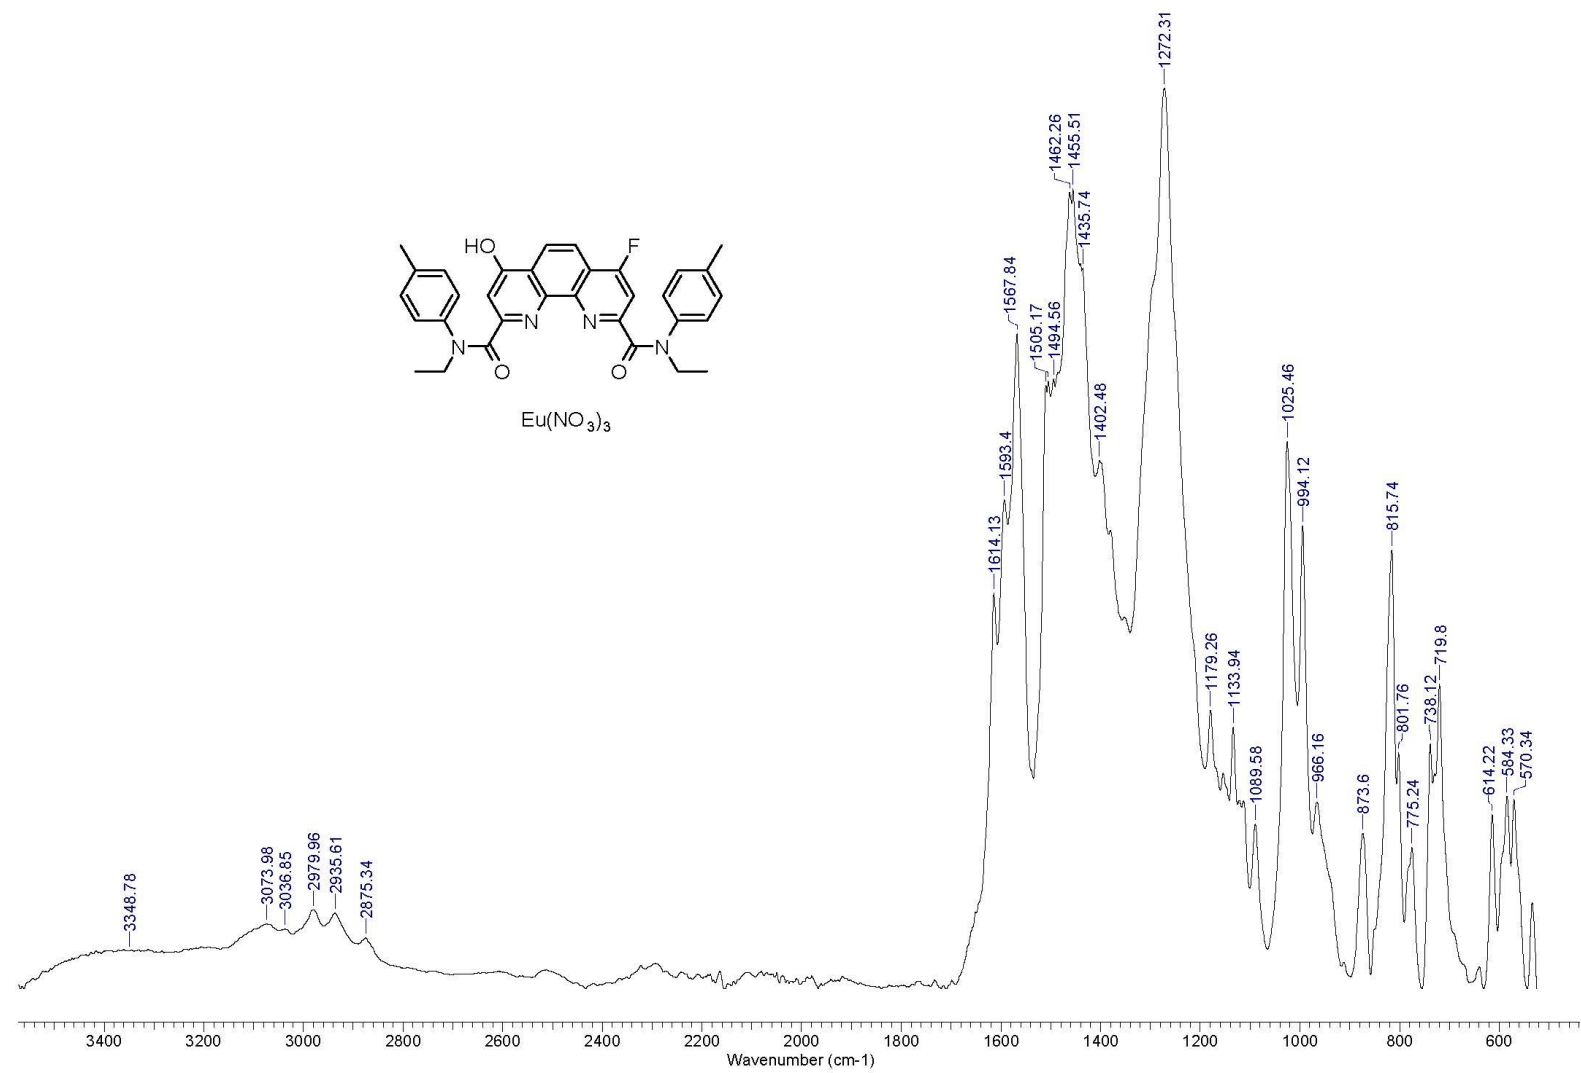

**Figure S23.** Solid-state IR spectrum at 25°C



*N*<sup>2</sup>,*N*<sup>9</sup>-diethyl-4-fluoro-7-hydroxy-*N*<sup>2</sup>,*N*<sup>9</sup>-di-*p*-tolyl-1,10-phenanthroline-2,9-dicarboxamide gadolinium trinitrate LFOH•Gd(NO<sub>3</sub>)<sub>3</sub>

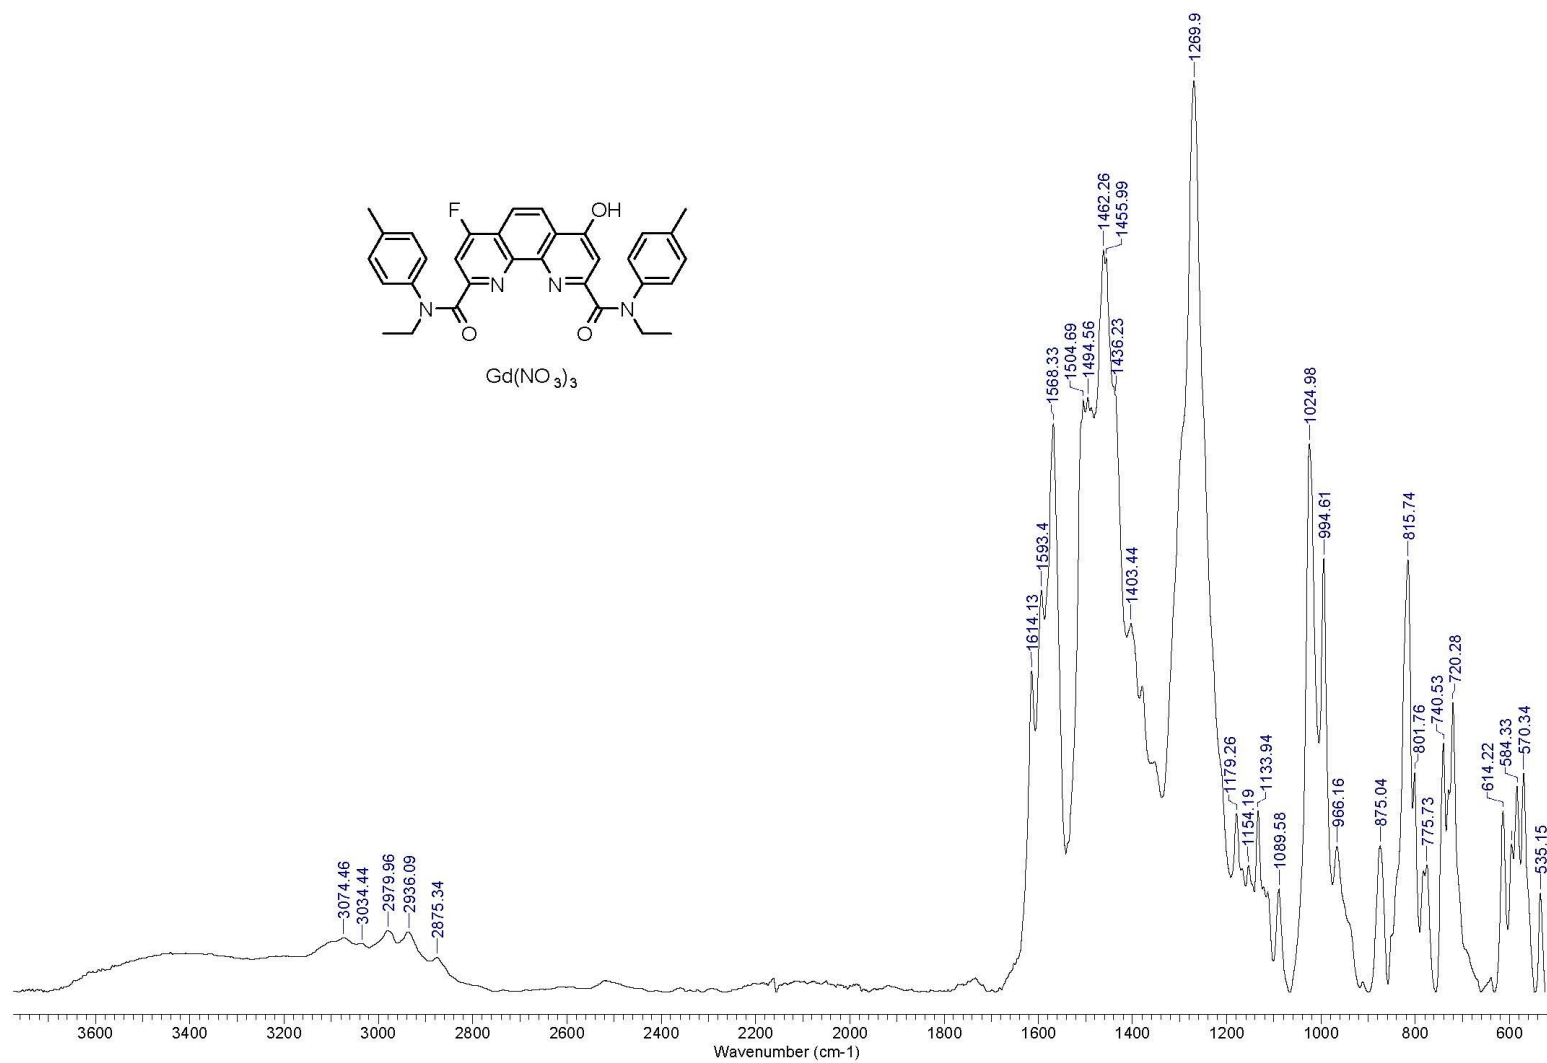

Figure S24. Solid-state IR spectrum at 25°C

*N*<sup>2</sup>,*N*<sup>9</sup>-diethyl-4-fluoro-7-hydroxy-*N*<sup>2</sup>,*N*<sup>9</sup>-di-*p*-tolyl-1,10-phenanthroline-2,9-dicarboxamide terbium trinitrate LFOH•Tb(NO<sub>3</sub>)<sub>3</sub>

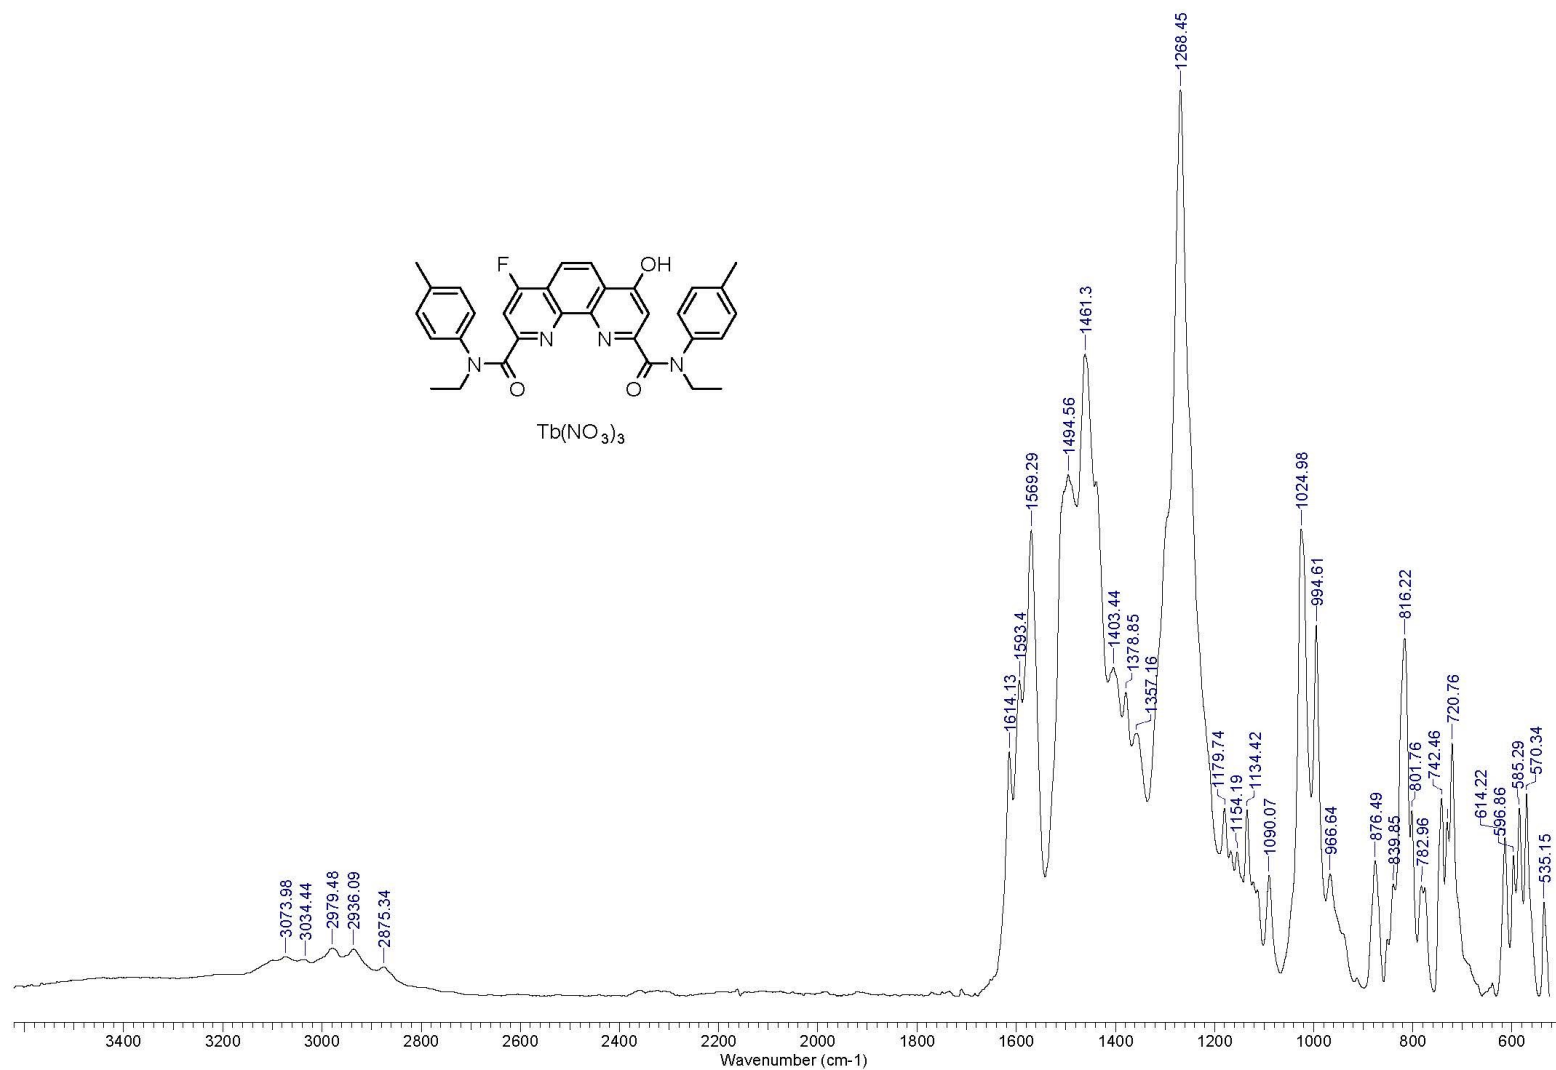

Figure S25. Solid-state IR spectrum at 25°C

*N*<sup>2</sup>,*N*<sup>9</sup>-diethyl-4,7-dihydroxy-*N*<sup>2</sup>,*N*<sup>9</sup>-di-*p*-tolyl-1,10-phenanthroline-2,9-dicarboxamide gadolinium trinitrate LOH•Gd(NO<sub>3</sub>)<sub>3</sub>

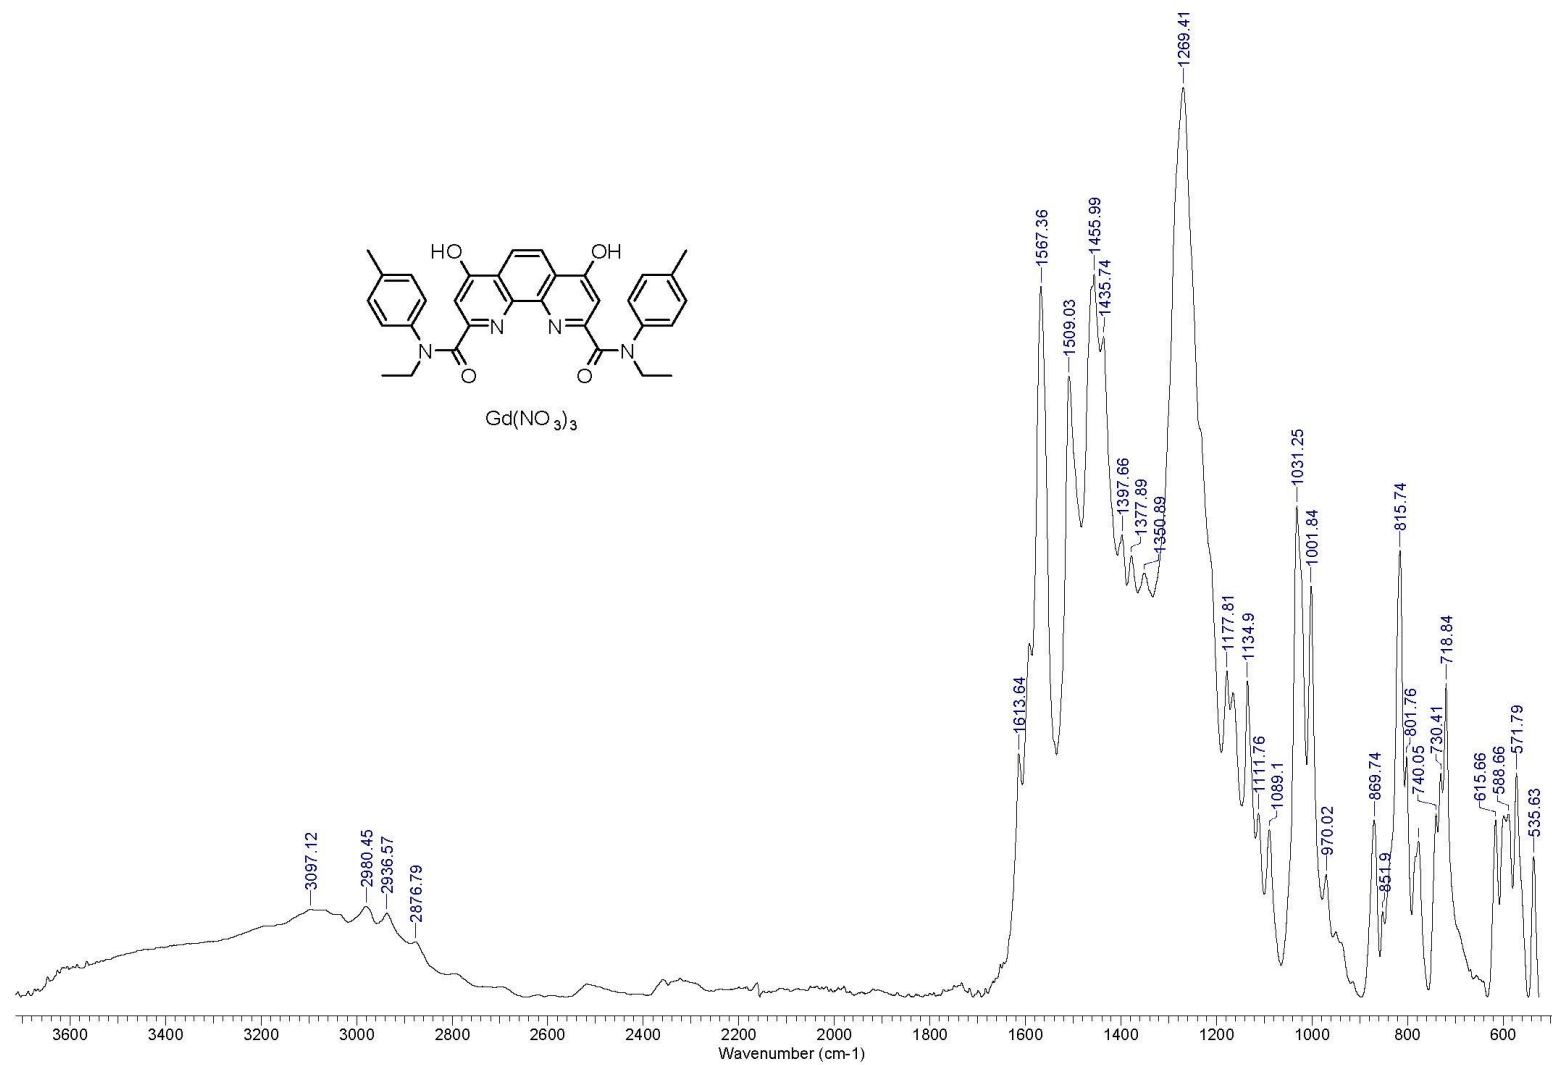

Figure S26. Solid-state IR spectrum at 25°C

*N*<sup>2</sup>,*N*<sup>9</sup>-diethyl-4,7-dihydroxy-*N*<sup>2</sup>,*N*<sup>9</sup>-di-*p*-tolyl-1,10-phenanthroline-2,9-dicarboxamide terbium trinitrate LOH•Tb(NO<sub>3</sub>)<sub>3</sub>

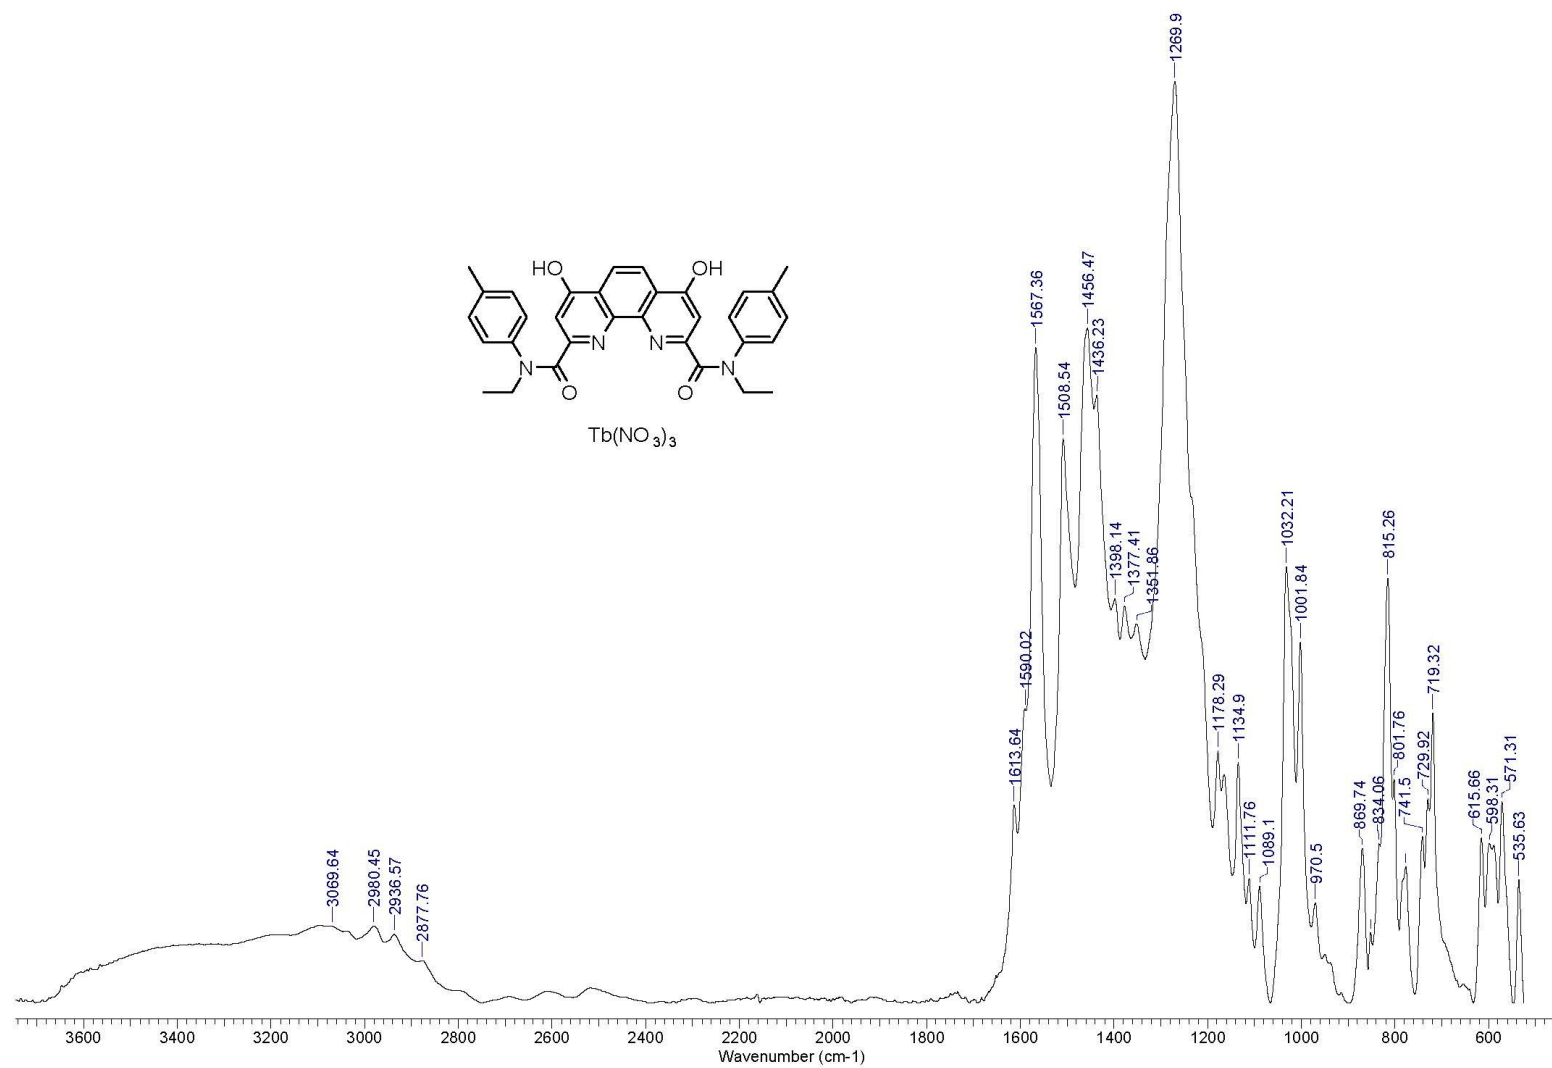

Figure S27. Solid-state IR spectrum at 25°C

### 3. Photoluminescence

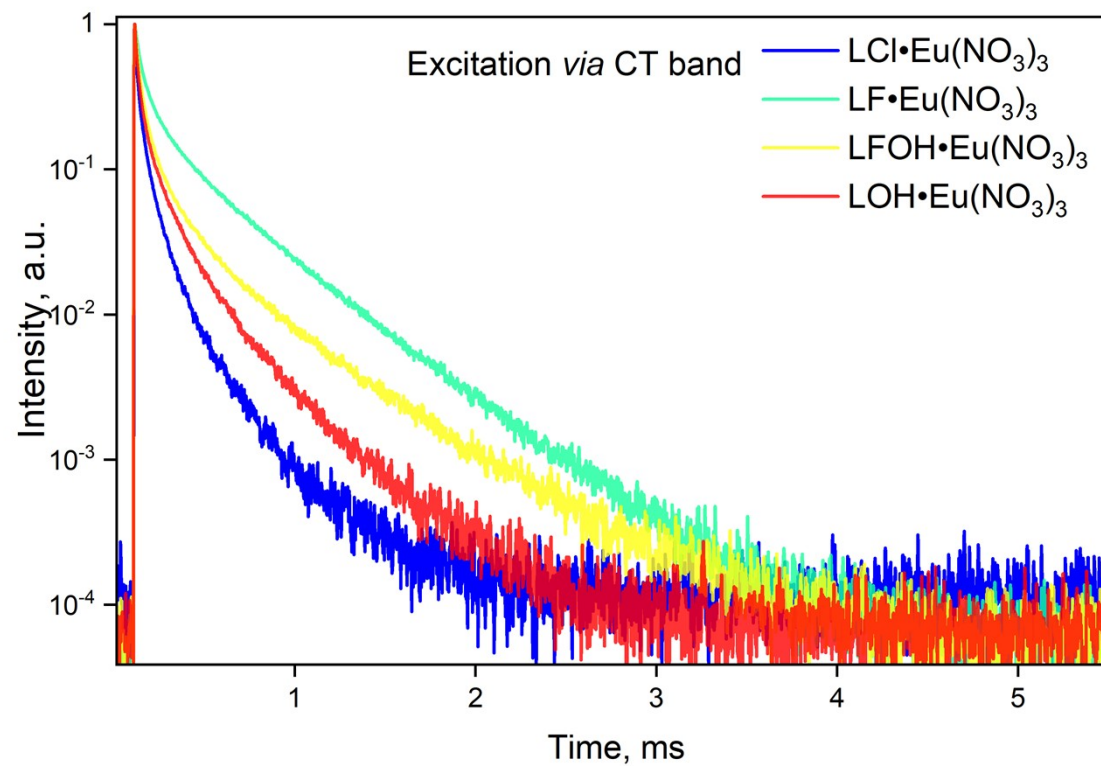

**Figure S28.** PL decays upon excitation via CT excitation band.

#### 4. DFT calculations

All structures were optimized at the DFT level in the gas phase (tolerance on gradient:  $10^{-7}$  au). We used quantum chemical software PRIODA-19 developed by Laikov [1] to evaluate quantum chemical calculations. The generalized gradient approximation (GGA) functional PBE was used for the geometry optimization and frequency calculations of all structures. All stationary points on the potential energy surface (PES) were checked by vibrational analysis and none of them had imaginary frequencies. Full electron relativistic L1 basis set [2] of TZ quality including one polarization function was used for all the atoms to provide the most reliable result. To make ESP maps for complexes we used Gaussian 16 [3] at B3LYP/6-31G(d,p)/RECP theoretical level. For light atoms, the 6-31G(d,p) basis sets were applied. For the europium, the relativistic effects were taken into account by using the scalar relativistic effective core potentials (RECPs), which replace 28 core electrons for Eu. The corresponding ECP28MWB-SEG valence basis sets were adopted for describing Eu atoms [4].

LH

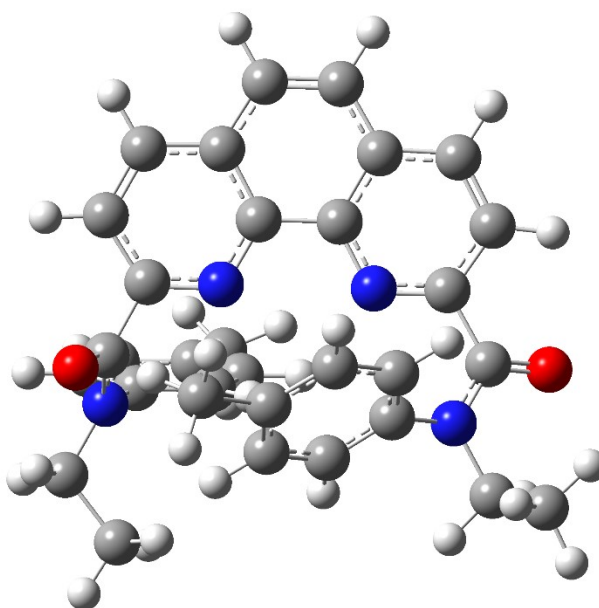

E= -1606.160553

G= 291.8428 kcal/mol, H= 359.4870 kcal/mol, U= 358.8945 kcal/mol, S= 226.8798 cal/mol at T= 298.150 K

|   |             |             |             |
|---|-------------|-------------|-------------|
| O | -1.55270107 | -2.39443068 | 2.66610486  |
| O | 3.39516695  | 1.94855529  | -3.01781923 |
| N | -2.61227418 | -1.82922185 | 0.70805077  |
| N | -0.63266897 | 0.46946711  | 1.34097883  |

|   |             |             |             |
|---|-------------|-------------|-------------|
| N | 2.99591405  | -0.03894810 | -1.95552469 |
| N | 1.36922643  | 1.58561108  | -0.17755243 |
| C | 2.80648608  | -0.79062941 | -0.75120050 |
| C | -1.89979757 | -1.54254084 | 1.85048895  |
| C | -5.01122023 | 0.34001833  | -1.15070152 |
| H | -6.08687538 | 0.54132638  | -1.15778350 |
| C | 0.82106298  | 2.32326473  | 0.81138479  |
| C | -1.54772197 | -0.09130386 | 2.11876508  |
| C | 1.82058823  | -1.78378026 | -0.69610258 |
| H | 1.18072624  | -1.95386824 | -1.56609995 |
| C | -0.22052472 | 1.72166359  | 1.63510603  |
| C | -4.49227868 | -0.57782596 | -0.23890411 |
| H | -5.15646898 | -1.09079938 | 0.46225157  |
| C | -2.96973380 | -3.23560477 | 0.44491400  |
| H | -4.06470969 | -3.30413743 | 0.32859973  |
| H | -2.67809197 | -3.78478483 | 1.35297399  |
| C | 2.34398947  | 2.12221752  | -0.89795955 |
| C | -0.30854977 | 3.80657609  | 2.96990728  |
| H | -0.74825472 | 4.36007441  | 3.80516334  |
| C | -1.73008259 | 1.83702045  | 3.53283344  |
| C | 0.65358566  | 4.37856662  | 2.18700959  |
| H | 0.99632773  | 5.39917843  | 2.38228804  |
| C | 2.80913677  | 3.44735473  | -0.72073379 |
| H | 3.58181257  | 3.82505803  | -1.39220442 |
| C | -3.11666506 | -0.83832732 | -0.20313525 |
| C | -2.11287364 | 0.54336266  | 3.24935076  |
| H | -2.83670824 | 0.00987117  | 3.86899034  |
| C | 3.50760674  | -0.76511079 | -3.13434580 |
| H | 3.25256091  | -0.15639585 | -4.01393817 |
| H | 2.96843368  | -1.72368776 | -3.19179992 |
| C | 1.24483658  | 3.65573087  | 1.10367852  |
| C | -4.17533717 | 1.01969286  | -2.04885773 |
| C | -0.75951574 | 2.47160566  | 2.72276914  |
| C | 1.62206046  | -2.50871175 | 0.47296100  |
| H | 0.82606640  | -3.25794539 | 0.51498683  |
| C | 2.96819254  | 1.33794259  | -2.03919514 |
| C | -2.79976502 | 0.75462271  | -1.99488935 |
| H | -2.12310049 | 1.28449814  | -2.67208228 |
| C | -2.26995355 | -0.16798726 | -1.09269769 |
| H | -1.19269758 | -0.33383124 | -1.03200929 |
| C | 3.39873334  | -1.29918926 | 1.54145716  |
| H | 4.02438265  | -1.10136766 | 2.41717899  |
| C | 3.62048451  | -0.57976258 | 0.36545187  |
| H | 4.41279344  | 0.17187278  | 0.31813384  |
| C | 2.26041358  | 4.20783156  | 0.28854955  |
| C | 2.38950834  | -2.26612850 | 1.62350912  |
| C | -4.74249217 | 1.99162290  | -3.05328958 |
| H | -4.00201082 | 2.75725971  | -3.33028002 |

|   |             |             |             |
|---|-------------|-------------|-------------|
| H | -5.63599618 | 2.49972376  | -2.65869156 |
| C | 5.01831691  | -0.99892126 | -3.07412774 |
| H | 5.55138823  | -0.03653246 | -3.07157932 |
| H | 5.34463649  | -1.57342541 | -3.95615354 |
| H | 5.29464880  | -1.56596242 | -2.17164471 |
| C | 2.10083498  | -3.01136965 | 2.90175817  |
| H | 2.26143467  | -4.09555108 | 2.77712582  |
| H | 1.04799690  | -2.86604138 | 3.19705145  |
| C | -2.27043178 | -3.80274178 | -0.79036781 |
| H | -2.51358115 | -3.21860018 | -1.69143940 |
| H | -2.59542696 | -4.84244419 | -0.95627027 |
| H | -1.17782245 | -3.79997325 | -0.65757349 |
| H | -5.04168070 | 1.47021645  | -3.97909415 |
| H | 2.74744960  | -2.66423154 | 3.72160930  |
| H | -2.15876659 | 2.37891959  | 4.38108062  |
| H | 2.59997664  | 5.23138935  | 0.47358569  |

## LCI

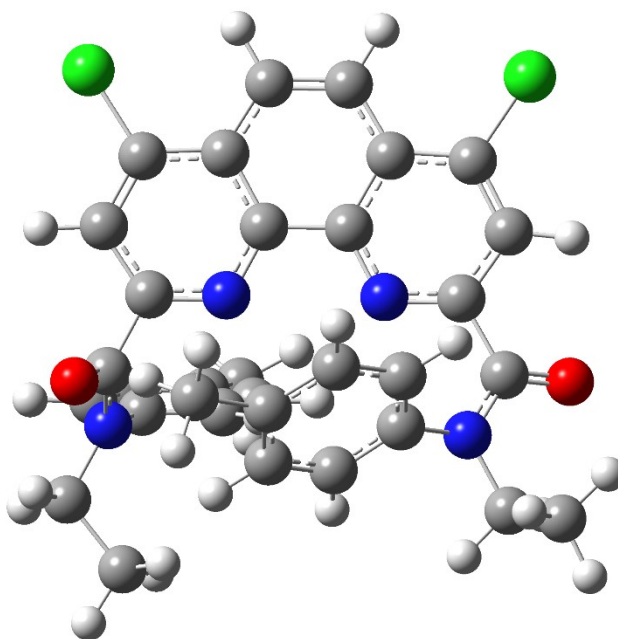

E= -2527.967506

G= 277.3062 kcal/mol, H= 349.2592 kcal/mol, U= 348.6667 kcal/mol, S= 241.3314 cal/mol at T= 298.150 K

|   |             |             |             |
|---|-------------|-------------|-------------|
| O | -1.49454845 | -2.40535139 | 2.60907509  |
| O | 3.41327053  | 1.91535538  | -3.01211935 |
| N | -2.60429031 | -1.84218593 | 0.67719175  |
| N | -0.61164291 | 0.46577988  | 1.31547556  |
| N | 3.00938402  | -0.07106938 | -1.94857188 |
| N | 1.38131513  | 1.56618309  | -0.17315545 |
| C | 2.82199639  | -0.81872461 | -0.74111600 |



|   |             |             |             |
|---|-------------|-------------|-------------|
| C | -1.87368903 | -1.55641727 | 1.80571158  |
| C | -5.03840543 | 0.33604468  | -1.12491556 |
| H | -6.11426155 | 0.53530378  | -1.11375011 |
| C | 0.83559543  | 2.31858516  | 0.80341110  |
| C | -1.53809097 | -0.09939771 | 2.07457311  |
| C | 1.83528444  | -1.81060176 | -0.68032552 |
| H | 1.19340197  | -1.98401218 | -1.54817967 |
| C | -0.21685656 | 1.71903820  | 1.61973441  |
| C | -4.50385917 | -0.58918980 | -0.22935711 |
| H | -5.15601771 | -1.10972872 | 0.47744759  |
| C | -2.95183667 | -3.25047981 | 0.40827255  |
| H | -4.04748694 | -3.32635144 | 0.30480083  |
| H | -2.64495112 | -3.80401580 | 1.30851788  |
| C | 2.36016203  | 2.09118164  | -0.89396598 |
| C | -0.32216706 | 3.81004200  | 2.93952026  |
| H | -0.77056953 | 4.36786666  | 3.76341228  |
| C | -1.75738405 | 1.82125481  | 3.47919816  |
| C | 0.65038363  | 4.37797340  | 2.16620777  |
| H | 0.98813086  | 5.39736652  | 2.36050401  |
| C | 2.83385558  | 3.41298723  | -0.73240614 |
| H | 3.60599649  | 3.78852344  | -1.40372845 |
| C | -3.12773440 | -0.84658587 | -0.21835841 |
| C | -2.13297250 | 0.52700599  | 3.19138751  |
| H | -2.86669963 | 0.00073328  | 3.80274034  |
| C | 3.51501600  | -0.80094892 | -3.12871285 |
| H | 3.25180656  | -0.19780012 | -4.00969692 |
| H | 2.97778851  | -1.76097082 | -3.17639359 |
| C | 1.25464266  | 3.65556420  | 1.09520694  |
| C | -4.21806645 | 1.02608865  | -2.02915409 |
| C | -0.77162703 | 2.47799508  | 2.69697179  |
| C | 1.63943784  | -2.53103212 | 0.49200229  |
| H | 0.84379188  | -3.28030662 | 0.53885818  |
| C | 2.98597256  | 1.30358168  | -2.03492597 |
| C | -2.84094424 | 0.76293779  | -2.00011974 |
| H | -2.17600444 | 1.30005867  | -2.68316448 |
| C | -2.29596769 | -0.16711793 | -1.11533135 |
| H | -1.21794567 | -0.33491408 | -1.07548210 |
| C | 3.41879915  | -1.31731888 | 1.55210337  |
| H | 4.04662750  | -1.11643082 | 2.42548178  |
| C | 3.63754786  | -0.60189694 | 0.37311320  |
| H | 4.43006543  | 0.14925828  | 0.32124765  |
| C | 2.28103750  | 4.18071045  | 0.26713818  |
| C | 2.41080962  | -2.28509316 | 1.63937720  |
| C | -4.80088016 | 2.00722869  | -3.01511823 |
| H | -4.09743632 | 2.82688958  | -3.22703122 |
| H | -5.73905377 | 2.44330078  | -2.63930221 |
| C | 5.02657665  | -1.03045678 | -3.07708630 |
| H | 5.55747493  | -0.06695642 | -3.07998727 |

|    |             |             |             |
|----|-------------|-------------|-------------|
| H  | 5.34820769  | -1.60614932 | -3.95992521 |
| H  | 5.30964301  | -1.59521191 | -2.17524385 |
| C  | 2.12811734  | -3.02857465 | 2.91977299  |
| H  | 2.28767170  | -4.11284643 | 2.79524884  |
| H  | 1.07672279  | -2.88198218 | 3.21906056  |
| C  | -2.26216751 | -3.80175360 | -0.83939077 |
| H  | -2.52397328 | -3.21494390 | -1.73337389 |
| H  | -2.57787751 | -4.84390201 | -1.00726723 |
| H  | -1.16800863 | -3.78757741 | -0.72049455 |
| H  | -5.02799978 | 1.51123900  | -3.97474257 |
| H  | 2.77893642  | -2.68069961 | 3.73588669  |
| Cl | -2.50578775 | 2.64667993  | 4.83122987  |
| Cl | 2.86173408  | 5.81623838  | 0.51201275  |

LF

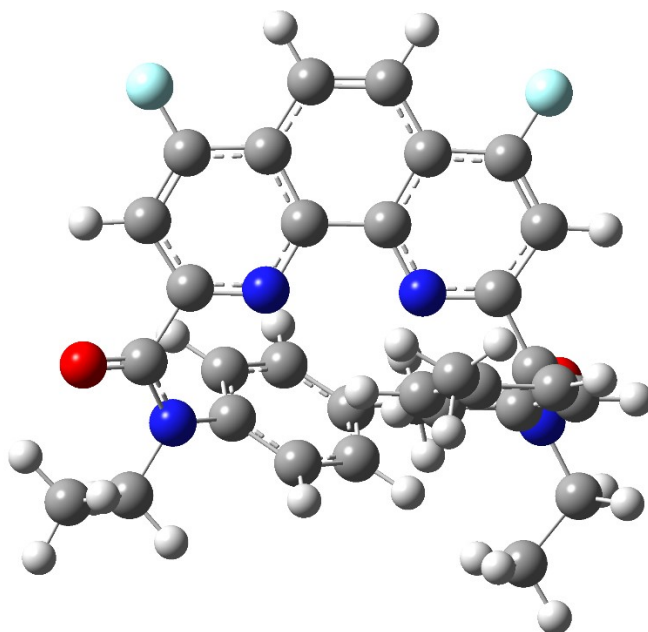

E= -1804.717679

G= 281.4096 kcal/mol, H= 350.8702 kcal/mol, U= 350.2777 kcal/mol, S= 232.9721 cal/mol at T= 298.150 K

|   |             |             |             |
|---|-------------|-------------|-------------|
| O | -1.51174787 | -2.37377074 | 2.65215710  |
| O | 3.47934781  | 1.95966562  | -2.98259565 |
| N | -2.62174292 | -1.83021178 | 0.71519925  |
| N | -0.61134430 | 0.47269680  | 1.32630966  |
| N | 3.04858485  | -0.03709407 | -1.95025223 |
| N | 1.40788840  | 1.58037043  | -0.17327550 |
| C | 2.84125726  | -0.80010632 | -0.75565384 |
| C | -1.88874547 | -1.53263353 | 1.83966817  |
| C | -5.06062447 | 0.31605686  | -1.11850489 |
| H | -6.13804771 | 0.50721315  | -1.11545305 |
| C | 0.84926040  | 2.32270093  | 0.80476007  |
| C | -1.54643331 | -0.07393613 | 2.09038909  |

|   |             |             |             |
|---|-------------|-------------|-------------|
| C | 1.84487126  | -1.78337367 | -0.71984832 |
| H | 1.20979897  | -1.93714933 | -1.59633573 |
| C | -0.20749645 | 1.72778282  | 1.61491490  |
| C | -4.52434275 | -0.59598848 | -0.21056187 |
| H | -5.17703465 | -1.11391496 | 0.49764653  |
| C | -2.97618372 | -3.24061035 | 0.46704283  |
| H | -4.07330505 | -3.31644416 | 0.37983742  |
| H | -2.65793358 | -3.78407764 | 1.36948248  |
| C | 2.39356114  | 2.11572246  | -0.87887217 |
| C | -0.31702052 | 3.83233538  | 2.93848555  |
| H | -0.77330559 | 4.38720011  | 3.76031495  |
| C | -1.74881367 | 1.85931981  | 3.46199197  |
| C | 0.66321555  | 4.39582394  | 2.17128096  |
| H | 1.00842396  | 5.41356469  | 2.36212080  |
| C | 2.86600924  | 3.43688571  | -0.70220153 |
| H | 3.64534931  | 3.82929619  | -1.35633046 |
| C | -3.14674369 | -0.84525792 | -0.19090090 |
| C | -2.14324806 | 0.56970585  | 3.19734653  |
| H | -2.88511808 | 0.06680980  | 3.81968967  |
| C | 3.56670204  | -0.75455588 | -3.13243825 |
| H | 3.31732414  | -0.13983097 | -4.00945907 |
| H | 3.02640505  | -1.71177531 | -3.19849864 |
| C | 1.26263128  | 3.65671271  | 1.10732709  |
| C | -4.24067048 | 1.00185311  | -2.02623476 |
| C | -0.75936145 | 2.49925933  | 2.68176494  |
| C | 1.63048391  | -2.51928863 | 0.43951001  |
| H | 0.82757289  | -3.26179769 | 0.46632999  |
| C | 3.03339864  | 1.33879606  | -2.01948420 |
| C | -2.86212730 | 0.74751322  | -1.98826386 |
| H | -2.19759503 | 1.28019417  | -2.67520915 |
| C | -2.31536426 | -0.16991103 | -1.09144685 |
| H | -1.23673518 | -0.33238097 | -1.04605499 |
| C | 3.41069560  | -1.33919341 | 1.53541976  |
| H | 4.03169176  | -1.15792038 | 2.41793659  |
| C | 3.64758333  | -0.60783997 | 0.36973399  |
| H | 4.44726231  | 0.13678286  | 0.33679198  |
| C | 2.29362404  | 4.18408546  | 0.29684827  |
| C | 2.39248203  | -2.29824989 | 1.59807773  |
| C | -4.82674338 | 1.96463432  | -3.02843899 |
| H | -4.12664977 | 2.78316907  | -3.25406569 |
| H | -5.76787321 | 2.40186992  | -2.66126698 |
| C | 5.07661622  | -0.99077824 | -3.06460398 |
| H | 5.61100968  | -0.02934299 | -3.04851603 |
| H | 5.40738043  | -1.55640574 | -3.95059749 |
| H | 5.34607340  | -1.56809685 | -2.16654977 |
| C | 2.08974905  | -3.05749410 | 2.86470218  |
| H | 2.23583451  | -4.14177090 | 2.72481393  |
| H | 1.03840403  | -2.90041632 | 3.15903251  |

|   |             |             |             |
|---|-------------|-------------|-------------|
| C | -2.30475261 | -3.80749810 | -0.78348260 |
| H | -2.57662491 | -3.22998207 | -1.68049564 |
| H | -2.62518642 | -4.85064228 | -0.93537745 |
| H | -1.20907784 | -3.79474966 | -0.67942413 |
| H | -5.04393147 | 1.44888247  | -3.97962055 |
| H | 2.73924135  | -2.73078192 | 3.69062646  |
| F | -2.30010289 | 2.53655294  | 4.48515555  |
| F | 2.71229424  | 5.44181618  | 0.52760627  |

## LFOH

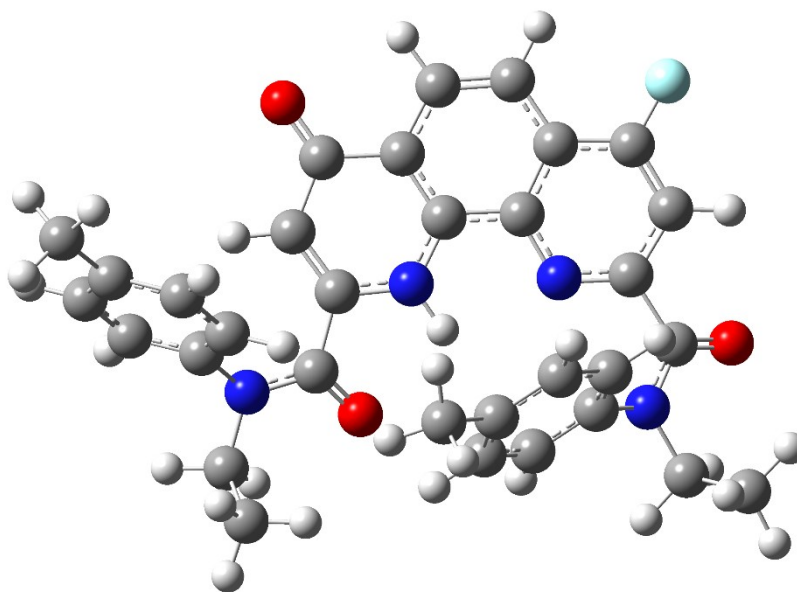

E= -1780.694250

G= 288.7924 kcal/mol, H= 359.0517 kcal/mol, U= 358.4592 kcal/mol, S= 235.6509 cal/mol at T= 298.150 K

|   |             |             |             |
|---|-------------|-------------|-------------|
| F | 4.78962431  | 4.67607113  | 0.61069299  |
| O | 6.10201491  | 0.19265565  | -1.20627706 |
| O | -0.69866648 | -0.93731906 | -2.20576893 |
| O | -2.23048302 | 4.49223450  | -0.38862276 |
| N | 2.82174940  | 1.23754299  | -0.58089733 |
| N | 0.12095656  | 1.20169823  | -0.92938592 |
| N | 4.38033663  | -1.20864025 | -0.64468005 |
| N | -2.90056205 | -0.68366497 | -1.65356201 |
| C | 4.96665771  | 0.03479469  | -0.76544670 |
| C | 4.13698799  | 1.25599340  | -0.41415765 |
| C | 4.85805603  | 2.40996103  | -0.02554754 |
| H | 5.94556679  | 2.37210887  | 0.04600922  |
| C | 4.14938761  | 3.56009154  | 0.22248260  |
| C | 2.74326958  | 3.60705859  | 0.06913368  |
| C | 1.95033938  | 4.76774998  | 0.28993578  |
| H | 2.43927825  | 5.69021065  | 0.60791776  |

|   |             |             |             |
|---|-------------|-------------|-------------|
| C | 0.59186732  | 4.71081952  | 0.09093938  |
| H | -0.05566998 | 5.57935210  | 0.23944156  |
| C | -0.05042782 | 3.51765045  | -0.32583537 |
| C | -1.51988798 | 3.49782418  | -0.54920654 |
| C | -2.03677822 | 2.19766210  | -0.97565300 |
| H | -3.10869091 | 2.13079623  | -1.15431515 |
| C | -1.22829814 | 1.10556982  | -1.14427578 |
| C | 0.71379144  | 2.36502354  | -0.53829858 |
| C | 2.14079564  | 2.38162232  | -0.35014377 |
| C | -1.58965916 | -0.26281740 | -1.68763837 |
| C | 3.26539136  | -1.49851384 | 0.20256572  |
| C | 3.30026932  | -1.17871103 | 1.56581040  |
| H | 4.18049517  | -0.67795023 | 1.97700482  |
| C | 2.21736204  | -1.48487316 | 2.38820846  |
| H | 2.25690111  | -1.21376425 | 3.44771768  |
| C | 1.08681338  | -2.14542275 | 1.88608257  |
| C | 1.07493982  | -2.47837955 | 0.52383482  |
| H | 0.20093775  | -2.98066944 | 0.09908007  |
| C | 2.14409432  | -2.15986832 | -0.31149231 |
| H | 2.09359534  | -2.39480330 | -1.37731333 |
| C | -0.06661543 | -2.50696627 | 2.78901528  |
| C | 5.14946934  | -2.35715617 | -1.16723331 |
| H | 5.71247660  | -1.98895102 | -2.03704389 |
| H | 4.42269544  | -3.11164349 | -1.50623735 |
| C | 6.10553657  | -2.95278964 | -0.13242667 |
| H | 6.63158448  | -3.81915107 | -0.56474466 |
| H | 5.56027691  | -3.29241934 | 0.76204439  |
| C | -3.88682029 | -0.21184497 | -0.72947266 |
| C | -3.64455570 | -0.22897992 | 0.64843456  |
| H | -2.68188692 | -0.58782626 | 1.02137945  |
| C | -4.61626047 | 0.23196782  | 1.53599150  |
| H | -4.40500676 | 0.22876950  | 2.60928959  |
| C | -5.85792677 | 0.69532465  | 1.08103283  |
| C | -6.09476883 | 0.68678097  | -0.30254146 |
| H | -7.05133291 | 1.05358116  | -0.68667499 |
| C | -5.12658513 | 0.24171938  | -1.19931141 |
| H | -5.31829460 | 0.27167249  | -2.27516041 |
| C | -6.91606837 | 1.17027057  | 2.04414207  |
| H | -6.48112199 | 1.42128561  | 3.02300690  |
| C | -3.21420772 | -1.92872948 | -2.38897086 |
| H | -2.54277742 | -1.96073070 | -3.25873234 |
| H | -4.25272477 | -1.84314846 | -2.74420270 |
| C | -3.03992643 | -3.18595616 | -1.53627348 |
| H | -3.32136383 | -4.07565253 | -2.12196805 |
| H | -3.67754790 | -3.14868410 | -0.63937327 |
| H | -1.98944398 | -3.29354838 | -1.22832901 |
| H | -7.43397182 | 2.06200342  | 1.65804086  |
| H | -7.67971240 | 0.39020934  | 2.20633062  |

|   |             |             |            |
|---|-------------|-------------|------------|
| H | -0.27286105 | -1.70551851 | 3.51572581 |
| H | -0.98377816 | -2.69509728 | 2.20980237 |
| H | 0.15338487  | -3.42244341 | 3.36493686 |
| H | 6.85578244  | -2.20544357 | 0.16492206 |
| H | 0.71199757  | 0.39000187  | -1.1537379 |

## LOH

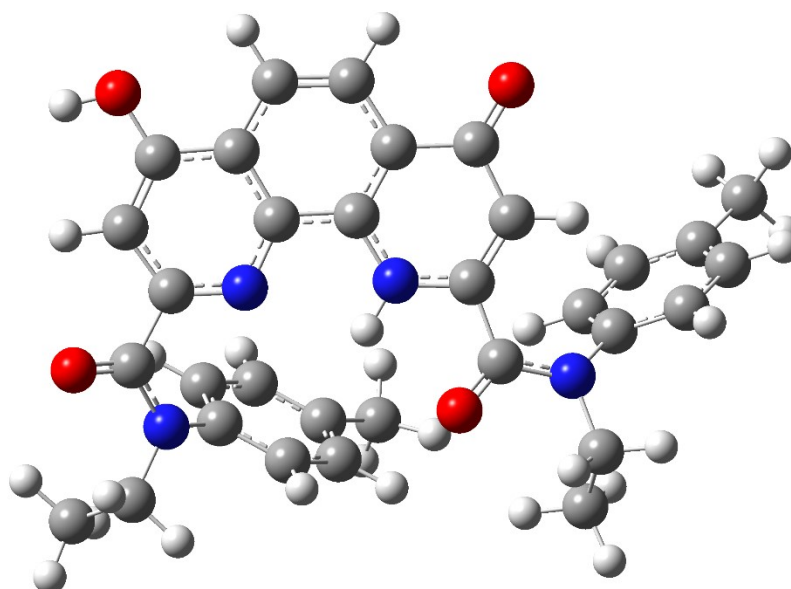

E= -1756.650935

G= 297.2662 kcal/mol, H= 366.3025 kcal/mol, U= 365.7100 kcal/mol, S= 231.5489 cal/mol at T= 298.150 K

|   |             |             |             |
|---|-------------|-------------|-------------|
| O | 1.11451059  | 0.51528834  | 6.02293215  |
| O | 0.56628392  | -2.48942337 | -0.26572147 |
| O | 3.62602549  | 1.80546675  | -2.96531523 |
| N | 1.41577137  | 0.85562939  | 2.54450448  |
| N | 1.47971910  | -0.03194344 | -0.01996977 |
| N | -0.37734041 | -0.31008453 | 4.49632585  |
| N | 0.29961766  | -2.37804513 | -2.53197755 |
| C | 0.68600814  | 0.48728627  | 4.87146049  |
| C | 1.39433369  | 1.29101181  | 3.79703145  |
| C | 2.09560716  | 2.43286204  | 4.23961079  |
| H | 2.05974615  | 2.67982897  | 5.30432242  |
| C | 2.82970472  | 3.17224903  | 3.32913219  |
| C | 2.87817527  | 2.74944131  | 1.96802763  |
| C | 3.61733903  | 3.42859386  | 0.95948313  |
| H | 4.17027693  | 4.32977441  | 1.22934834  |
| C | 3.63339403  | 2.94093673  | -0.32556690 |
| H | 4.19560862  | 3.42729575  | -1.12732129 |
| C | 2.92203587  | 1.76835863  | -0.68237659 |
| C | 2.97602903  | 1.25247964  | -2.07512285 |
| C | 2.19394000  | 0.03511420  | -2.28612190 |

|   |             |             |             |
|---|-------------|-------------|-------------|
| H | 2.20285709  | -0.38687602 | -3.28981422 |
| C | 1.47600594  | -0.55991521 | -1.28293982 |
| C | 2.18208339  | 1.09426833  | 0.29516062  |
| C | 2.14462086  | 1.56774535  | 1.65424670  |
| C | 0.72309345  | -1.87389852 | -1.32068288 |
| C | -1.17855626 | -0.09641169 | 3.33151741  |
| C | -1.78770198 | 1.14371189  | 3.10082206  |
| H | -1.61898955 | 1.96245310  | 3.80493065  |
| C | -2.58886159 | 1.33635691  | 1.97685229  |
| H | -3.04369917 | 2.31691300  | 1.80565223  |
| C | -2.83323486 | 0.29412287  | 1.07089464  |
| C | -2.23379663 | -0.94769986 | 1.32560557  |
| H | -2.39165097 | -1.77583937 | 0.62868766  |
| C | -1.41538045 | -1.14574720 | 2.43618154  |
| H | -0.92708027 | -2.11098117 | 2.58939098  |
| C | -3.73144889 | 0.49817262  | -0.12415664 |
| C | -0.91128509 | -1.22800793 | 5.52316528  |
| H | -0.05816244 | -1.53282987 | 6.14639575  |
| H | -1.30383505 | -2.11375182 | 4.99979685  |
| C | -1.99599561 | -0.58703329 | 6.39052679  |
| H | -2.37728405 | -1.32246711 | 7.11720609  |
| H | -2.84146713 | -0.24010537 | 5.77618191  |
| C | 0.03334433  | -1.58973018 | -3.69629500 |
| C | -0.81488950 | -0.47872807 | -3.63205571 |
| H | -1.26232610 | -0.19800116 | -2.67519942 |
| C | -1.06620802 | 0.27790447  | -4.77601306 |
| H | -1.71694421 | 1.15435042  | -4.70517607 |
| C | -0.50496051 | -0.06342701 | -6.01372930 |
| C | 0.32663810  | -1.19292062 | -6.06764323 |
| H | 0.78796124  | -1.47610841 | -7.01850234 |
| C | 0.59642160  | -1.94750396 | -4.92865848 |
| H | 1.27236423  | -2.80483532 | -4.98486383 |
| C | -0.79667642 | 0.74237624  | -7.25410433 |
| H | -1.17377044 | 1.74408655  | -6.99967141 |
| C | -0.22814054 | -3.75982523 | -2.52393272 |
| H | 0.32326457  | -4.30474766 | -1.74461516 |
| H | 0.00832169  | -4.20485643 | -3.50280094 |
| C | -1.73186135 | -3.82439786 | -2.25424343 |
| H | -2.07406764 | -4.87082596 | -2.29650539 |
| H | -2.29497505 | -3.24768527 | -3.00432705 |
| H | -1.95561301 | -3.42865543 | -1.25262208 |
| H | 0.10658512  | 0.86152005  | -7.87258328 |
| H | -1.55938890 | 0.24502870  | -7.87773349 |
| H | -3.57161770 | 1.48743408  | -0.58124051 |
| H | -3.55609010 | -0.27119694 | -0.89192484 |
| H | -4.79502598 | 0.43907065  | 0.16488483  |
| H | -1.58090949 | 0.26639915  | 6.94662901  |
| H | 1.00816098  | -0.54755933 | 0.73487412  |

|   |            |            |            |
|---|------------|------------|------------|
| O | 3.52730393 | 4.28970748 | 3.65568149 |
| H | 3.42608203 | 4.44882672 | 4.61406477 |

**LH•Eu(NO<sub>3</sub>)<sub>3</sub>**

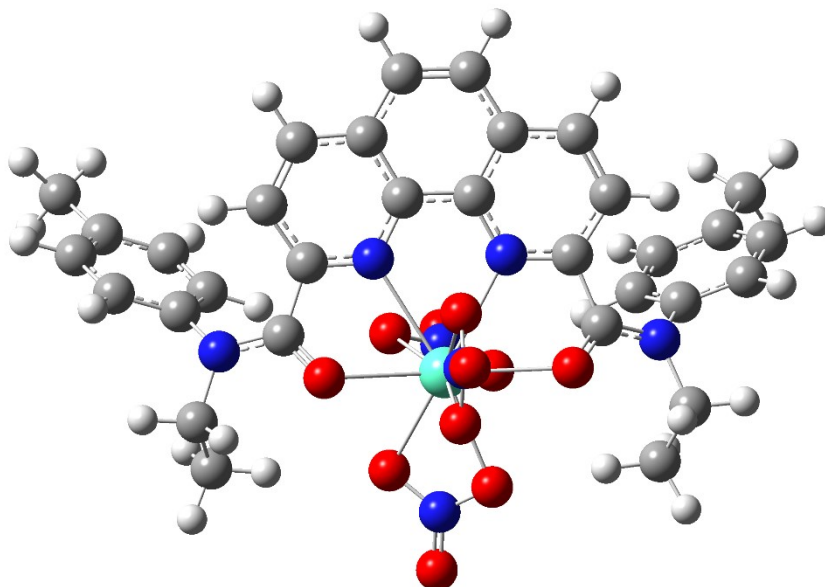

E= -13294.937077

G= 310.1405 kcal/mol, H= 398.9847 kcal/mol, U= 398.3922 kcal/mol, S= 297.9850 cal/mol at T= 298.150 K

|    |             |             |             |
|----|-------------|-------------|-------------|
| Eu | 0.00531492  | -2.02120300 | 0.54826223  |
| O  | -2.48619629 | -2.27688954 | 0.93086684  |
| O  | 2.50280956  | -2.21042518 | 1.05665831  |
| O  | -0.01832720 | -4.96965481 | -2.34687485 |
| O  | 0.01540212  | -1.92638578 | 3.04076198  |
| O  | -0.03996094 | -3.90237686 | 2.10920368  |
| N  | -4.42216313 | -1.30923212 | 0.21057468  |
| O  | 0.95039310  | -3.99312912 | -0.62951112 |
| N  | -1.37748336 | 0.06729783  | 1.47066391  |
| N  | 4.42657948  | -1.25782135 | 0.28713894  |
| O  | 1.31924111  | -1.06046422 | -1.40103130 |
| N  | -0.00313716 | -4.10810014 | -1.48612474 |
| N  | 1.31477310  | 0.13955412  | 1.38967102  |
| O  | -0.11682353 | -3.72631175 | 4.30101414  |
| N  | -0.05024347 | -3.20943915 | 3.19993325  |
| O  | 0.56024054  | 0.50210052  | -2.75522917 |
| O  | -0.95464435 | -3.23224906 | -1.36961598 |
| N  | 0.39052083  | -0.26507107 | -1.81839046 |
| O  | -0.72429327 | -0.31800143 | -1.16725250 |
| C  | 5.02753704  | -0.13092742 | -0.36441128 |
| C  | -3.20539144 | -1.26888471 | 0.81854135  |
| C  | -6.98063851 | 1.27197707  | -0.62781064 |
| H  | -8.02668926 | 1.49314276  | -0.39510612 |
| C  | 0.67822218  | 1.17151784  | 1.97512757  |
| C  | -2.70568022 | 0.02363883  | 1.42925802  |
| C  | 6.33881070  | 0.24712293  | -0.04805274 |



|   |             |             |             |
|---|-------------|-------------|-------------|
| H | 6.89307564  | -0.30291079 | 0.71760192  |
| C | -0.76541271 | 1.13416764  | 2.01490972  |
| C | -6.37988472 | 0.14740038  | -0.06624060 |
| H | -6.94558379 | -0.50207081 | 0.60729420  |
| C | -4.91955431 | -2.63311491 | -0.24755279 |
| H | -6.01818913 | -2.59721832 | -0.17413520 |
| H | -4.54119700 | -3.37528717 | 0.46981839  |
| C | 2.64624196  | 0.12630211  | 1.35351763  |
| C | -0.75351660 | 3.29141424  | 3.20080695  |
| H | -1.31539662 | 4.10402651  | 3.66960488  |
| C | -2.89012167 | 2.10615776  | 2.62010423  |
| C | 0.61395453  | 3.32153280  | 3.17409136  |
| H | 1.15707427  | 4.15788867  | 3.62292317  |
| C | 3.42076944  | 1.16812379  | 1.90966447  |
| H | 4.50937223  | 1.12533468  | 1.86672671  |
| C | -5.03894526 | -0.14190874 | -0.34836870 |
| C | -3.50786213 | 1.03023388  | 2.01111421  |
| H | -4.59508805 | 0.95404955  | 1.98156675  |
| C | 4.96714863  | -2.60599758 | -0.02721528 |
| H | 4.64475226  | -3.27353815 | 0.78512628  |
| H | 6.06459108  | -2.51536451 | 0.00047620  |
| C | 1.36639992  | 2.26702109  | 2.56355008  |
| C | -6.26624739 | 2.13055903  | -1.47868682 |
| C | -1.48036664 | 2.20177721  | 2.62216681  |
| C | 6.92192677  | 1.33385545  | -0.69601965 |
| H | 7.94370556  | 1.62767877  | -0.43703113 |
| C | 3.19102833  | -1.19746588 | 0.85308732  |
| C | -4.92639326 | 1.82151347  | -1.75216337 |
| H | -4.34814545 | 2.46954743  | -2.41768509 |
| C | -4.31390069 | 0.69265277  | -1.20856576 |
| H | -3.27208129 | 0.45440168  | -1.45072898 |
| C | 4.91103515  | 1.66469754  | -1.97541054 |
| H | 4.34431564  | 2.20942763  | -2.73659050 |
| C | 4.31662925  | 0.57118679  | -1.34536307 |
| H | 3.30663182  | 0.24186789  | -1.61650861 |
| C | 2.77749239  | 2.23237452  | 2.51326706  |
| C | 6.21903312  | 2.06428744  | -1.66818514 |
| C | -6.93251213 | 3.32793476  | -2.10753482 |
| H | -6.20363934 | 4.12301928  | -2.32562588 |
| H | -7.71464966 | 3.74192332  | -1.45274151 |
| C | 4.49073158  | -3.13720888 | -1.37750591 |
| H | 3.39904235  | -3.27657777 | -1.37607961 |
| H | 4.96136164  | -4.11499389 | -1.56718531 |
| H | 4.76776283  | -2.45427630 | -2.19540253 |
| C | 6.86845890  | 3.22018459  | -2.38639547 |
| H | 7.41777929  | 2.86747000  | -3.27640458 |
| H | 7.59072172  | 3.74072461  | -1.73880176 |
| C | -4.47320953 | -2.97768959 | -1.66669113 |

|   |             |             |             |
|---|-------------|-------------|-------------|
| H | -4.82038191 | -2.22173907 | -2.38810281 |
| H | -4.90452718 | -3.95001592 | -1.95335668 |
| H | -3.37654971 | -3.05912755 | -1.72479644 |
| H | -7.41375173 | 3.04999597  | -3.06115299 |
| H | 6.11919512  | 3.94956184  | -2.72939341 |
| H | -3.48504518 | 2.89047637  | 3.09572509  |
| H | 3.35374907  | 3.04594917  | 2.96221360  |

### LCI•Eu(NO<sub>3</sub>)<sub>3</sub>

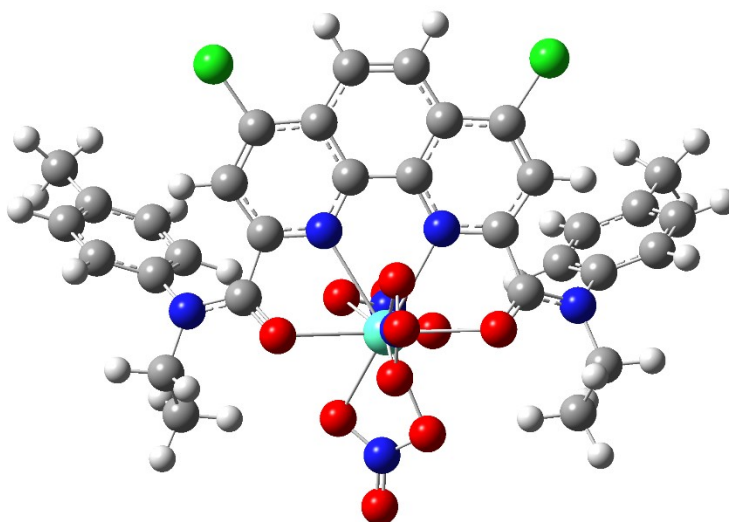

E= -14216.741643

G= 296.9106 kcal/mol, H= 388.0832 kcal/mol, U= 387.4907 kcal/mol, S= 305.7945 cal/mol at T= 298.150 K

|    |             |             |             |
|----|-------------|-------------|-------------|
| Eu | 0.00021507  | -2.05338357 | 0.55570563  |
| O  | -2.49016350 | -2.30336816 | 0.94478190  |
| O  | 2.49728326  | -2.22399670 | 1.05516453  |
| O  | -0.01240844 | -5.00597963 | -2.33068155 |
| O  | 0.02374176  | -1.95254677 | 3.04596089  |
| O  | -0.03445713 | -3.93019095 | 2.11832201  |
| N  | -4.41266651 | -1.32412818 | 0.19865490  |
| O  | 0.95551712  | -4.02064163 | -0.61778598 |
| N  | -1.37492918 | 0.04453710  | 1.48386613  |
| N  | 4.41084022  | -1.26333282 | 0.26787769  |
| O  | 1.29846207  | -1.08090929 | -1.39774433 |
| N  | 0.00120341  | -4.14234042 | -1.47263622 |
| N  | 1.29967032  | 0.12407534  | 1.39355990  |
| O  | -0.08117600 | -3.75131338 | 4.31062817  |
| N  | -0.03318000 | -3.23591841 | 3.20850751  |
| O  | 0.51776469  | 0.46978045  | -2.75331301 |
| O  | -0.95397245 | -3.26991259 | -1.35623317 |
| N  | 0.36007685  | -0.29615948 | -1.81392019 |
| O  | -0.75214345 | -0.35992359 | -1.15846766 |

|   |             |             |             |
|---|-------------|-------------|-------------|
| C | 5.00259360  | -0.13256808 | -0.38651153 |
| C | -3.20422543 | -1.29356140 | 0.82033115  |
| C | -6.93264857 | 1.28676483  | -0.66611066 |
| H | -7.97883910 | 1.51931307  | -0.44584972 |
| C | 0.67278441  | 1.15558624  | 1.98893917  |
| C | -2.70211738 | -0.00287879 | 1.43641421  |
| C | 6.31280954  | 0.25301888  | -0.07501351 |
| H | 6.87435706  | -0.29395241 | 0.68746160  |
| C | -0.77422371 | 1.11443427  | 2.03338282  |
| C | -6.35371782 | 0.15143015  | -0.10305069 |
| H | -6.94027933 | -0.49502613 | 0.55542492  |
| C | -4.91943466 | -2.64436740 | -0.26048489 |
| H | -6.01809307 | -2.59710831 | -0.19572245 |
| H | -4.55444048 | -3.38847478 | 0.46189839  |
| C | 2.63044495  | 0.11154318  | 1.34735213  |
| C | -0.76257279 | 3.26742348  | 3.22533404  |
| H | -1.32458981 | 4.07498635  | 3.69716681  |
| C | -2.90158215 | 2.06649632  | 2.62986692  |
| C | 0.60477137  | 3.30043863  | 3.19565638  |
| H | 1.14649392  | 4.13421605  | 3.64507720  |
| C | 3.41413411  | 1.14510361  | 1.89736291  |
| H | 4.50193056  | 1.11234872  | 1.84776767  |
| C | -5.01194164 | -0.15024240 | -0.36705008 |
| C | -3.51546503 | 0.99218035  | 2.01422788  |
| H | -4.60166008 | 0.92098269  | 1.98151832  |
| C | 4.95889819  | -2.60892369 | -0.04572027 |
| H | 4.64650550  | -3.27628501 | 0.77072326  |
| H | 6.05570312  | -2.51028375 | -0.02453308 |
| C | 1.35702975  | 2.25452870  | 2.58041155  |
| C | -6.19631316 | 2.14265579  | -1.50070962 |
| C | -1.48744750 | 2.18287492  | 2.64573781  |
| C | 6.88517158  | 1.34532824  | -0.72306916 |
| H | 7.90541292  | 1.64651152  | -0.46688972 |
| C | 3.18045338  | -1.21000459 | 0.84234976  |
| C | -4.85695646 | 1.81852589  | -1.75893033 |
| H | -4.26212820 | 2.46296600  | -2.41317878 |
| C | -4.26545150 | 0.67936074  | -1.21387321 |
| H | -3.22349744 | 0.42928078  | -1.44423014 |
| C | 4.86663719  | 1.66468207  | -1.99357087 |
| H | 4.29324838  | 2.20675105  | -2.75158469 |
| C | 4.28235731  | 0.56601304  | -1.36311588 |
| H | 3.27397023  | 0.22934598  | -1.63125977 |
| C | 2.77282723  | 2.20533122  | 2.51007818  |
| C | 6.17290540  | 2.07311183  | -1.69043273 |
| C | -6.83846543 | 3.35381687  | -2.12772974 |
| H | -6.09693967 | 4.14261279  | -2.32467294 |
| H | -7.62627825 | 3.76966715  | -1.48113994 |
| C | 4.47863669  | -3.14740325 | -1.39170406 |

|    |             |             |             |
|----|-------------|-------------|-------------|
| H  | 3.38764357  | -3.29171121 | -1.38573522 |
| H  | 4.95352261  | -4.12353388 | -1.57893552 |
| H  | 4.74957211  | -2.46675441 | -2.21350645 |
| C  | 6.81008433  | 3.23681637  | -2.40662078 |
| H  | 7.35788819  | 2.89192963  | -3.30058803 |
| H  | 7.53116324  | 3.75961125  | -1.75968013 |
| C  | -4.46495508 | -2.99636827 | -1.67514669 |
| H  | -4.79827965 | -2.23820214 | -2.40068428 |
| H  | -4.90505931 | -3.96431848 | -1.96304939 |
| H  | -3.36889589 | -3.08967238 | -1.72445289 |
| H  | -7.30669554 | 3.09136320  | -3.09211171 |
| H  | 6.05359664  | 3.96192382  | -2.74248907 |
| Cl | -3.88959459 | 3.29229984  | 3.38094725  |
| Cl | 3.72956359  | 3.48371794  | 3.21146117  |

### LF•Eu(NO<sub>3</sub>)<sub>3</sub>

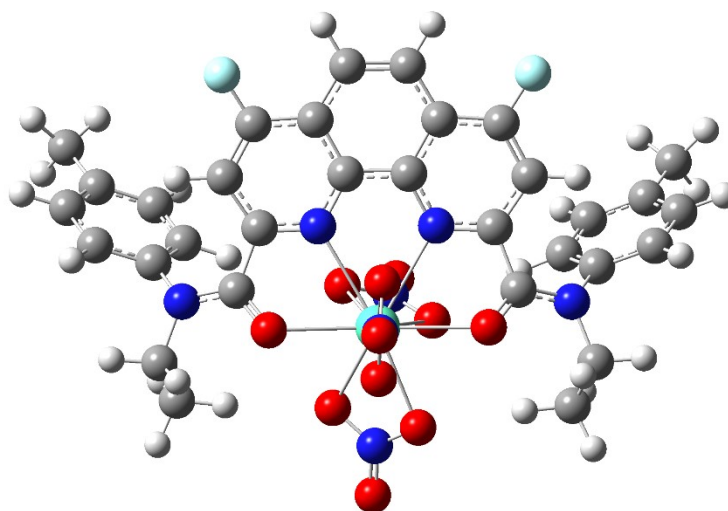

E= -13493.491865

G= 298.7244 kcal/mol, H= 390.2000 kcal/mol, U= 389.6075 kcal/mol, S= 306.8108 cal/mol at T= 298.150 K

|    |             |             |             |
|----|-------------|-------------|-------------|
| Eu | 0.00661713  | -2.03586439 | 0.53589207  |
| O  | -2.48914887 | -2.27888512 | 0.91947982  |
| O  | 2.50613813  | -2.21482498 | 1.05277604  |
| O  | -0.01114270 | -4.99026212 | -2.34714276 |
| O  | 0.01486333  | -1.93479456 | 3.02712105  |
| O  | -0.04574269 | -3.91236884 | 2.09939975  |
| N  | -4.42730637 | -1.31242879 | 0.20183067  |
| O  | 0.95528474  | -4.00862949 | -0.63127138 |
| N  | -1.37606612 | 0.06123280  | 1.45399725  |
| N  | 4.43203150  | -1.26314241 | 0.28509834  |
| O  | 1.32762014  | -1.07810384 | -1.41022577 |
| N  | 0.00336375  | -4.12617896 | -1.48952654 |
| N  | 1.31332320  | 0.13237552  | 1.37461985  |
| O  | -0.11418090 | -3.73255288 | 4.29113749  |

|   |             |             |             |
|---|-------------|-------------|-------------|
| N | -0.05146558 | -3.21764532 | 3.18934938  |
| O | 0.56991033  | 0.48112884  | -2.76896134 |
| O | -0.94819937 | -3.24915590 | -1.37729356 |
| N | 0.39900284  | -0.28454454 | -1.83141032 |
| O | -0.71772926 | -0.33833555 | -1.18308885 |
| C | 5.03374782  | -0.13524567 | -0.36504224 |
| C | -3.20967902 | -1.27279469 | 0.80530230  |
| C | -6.98508058 | 1.27869486  | -0.60715528 |
| H | -8.02653444 | 1.50567862  | -0.36023997 |
| C | 0.67849610  | 1.16424677  | 1.96058438  |
| C | -2.70409455 | 0.02094278  | 1.41376892  |
| C | 6.33990884  | 0.25027821  | -0.03719195 |
| H | 6.89054554  | -0.29522558 | 0.73430321  |
| C | -0.76561518 | 1.12751989  | 1.99983305  |
| C | -6.38342229 | 0.15024083  | -0.05439588 |
| H | -6.94409282 | -0.49696969 | 0.62550731  |
| C | -4.92731526 | -2.63694324 | -0.25268221 |
| H | -6.02575789 | -2.59818685 | -0.17993049 |
| H | -4.55080491 | -3.37759189 | 0.46730986  |
| C | 2.64497951  | 0.12125672  | 1.34229642  |
| C | -0.75382922 | 3.29263684  | 3.19267096  |
| H | -1.31981306 | 4.10023144  | 3.66009658  |
| C | -2.87741594 | 2.08951953  | 2.59373566  |
| C | 0.61444673  | 3.32199154  | 3.16706898  |
| H | 1.16217468  | 4.15283281  | 3.61520754  |
| C | 3.42297235  | 1.15911776  | 1.89414493  |
| H | 4.51254520  | 1.14138606  | 1.86095832  |
| C | -5.04723189 | -0.14424337 | -0.35284687 |
| C | -3.50996519 | 1.02453700  | 1.98979382  |
| H | -4.59873615 | 0.97480771  | 1.96662873  |
| C | 4.97626577  | -2.61123860 | -0.02475250 |
| H | 4.65514938  | -3.27731840 | 0.78934854  |
| H | 6.07331151  | -2.51728433 | 0.00407695  |
| C | 1.35410521  | 2.26457738  | 2.55328530  |
| C | -6.27659666 | 2.13518464  | -1.46516140 |
| C | -1.46783846 | 2.20118935  | 2.60955845  |
| C | 6.92193313  | 1.34020088  | -0.68081709 |
| H | 7.93908276  | 1.64113881  | -0.41227905 |
| C | 3.19576093  | -1.20411378 | 0.84641749  |
| C | -4.94195650 | 1.81942105  | -1.75633576 |
| H | -4.36902830 | 2.46505198  | -2.42870998 |
| C | -4.32854905 | 0.68692943  | -1.22139777 |
| H | -3.29094791 | 0.44341077  | -1.47600675 |
| C | 4.92083536  | 1.65703486  | -1.97939957 |
| H | 4.35826971  | 2.19701958  | -2.74697362 |
| C | 4.32720668  | 0.56088179  | -1.35326841 |
| H | 3.32159618  | 0.22518615  | -1.63289729 |
| C | 2.76415934  | 2.21254842  | 2.49179416  |

|   |             |             |             |
|---|-------------|-------------|-------------|
| C | 6.22329227  | 2.06545146  | -1.65994779 |
| C | -6.94386480 | 3.33817722  | -2.08129174 |
| H | -6.21488559 | 4.13244137  | -2.30165153 |
| H | -7.71943431 | 3.75014822  | -1.41762762 |
| C | 4.50230065  | -3.14756751 | -1.37383400 |
| H | 3.41077502  | -3.28791703 | -1.37394530 |
| H | 4.97429184  | -4.12558841 | -1.55852359 |
| H | 4.78063066  | -2.46779752 | -2.19388520 |
| C | 6.87128227  | 3.22602937  | -2.37156370 |
| H | 7.43136700  | 2.87726533  | -3.25636684 |
| H | 7.58361466  | 3.75095682  | -1.71668651 |
| C | -4.47965745 | -2.98697028 | -1.67008930 |
| H | -4.82542002 | -2.23368737 | -2.39491391 |
| H | -4.91234996 | -3.95972398 | -1.95304886 |
| H | -3.38310941 | -3.07026311 | -1.72683700 |
| H | -7.43434578 | 3.06692452  | -3.03220469 |
| H | 6.12016672  | 3.95035130  | -2.72093282 |
| F | -3.60378887 | 3.05404962  | 3.17499730  |
| F | 3.46877447  | 3.21216215  | 3.04036409  |

**LFOH•Eu(NO<sub>3</sub>)<sub>3</sub>**

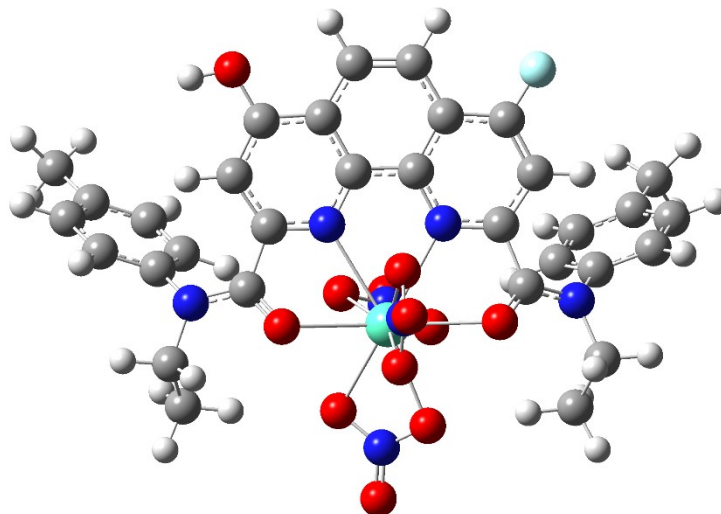

E= -13469.450064

G= 306.5916 kcal/mol, H= 398.0529 kcal/mol, U= 397.4604 kcal/mol, S= 306.7626 cal/mol at T= 298.150 K

|    |             |             |             |
|----|-------------|-------------|-------------|
| Eu | 0.00661713  | -2.03586439 | 0.53589207  |
| O  | -2.48914887 | -2.27888512 | 0.91947982  |
| O  | 2.50613813  | -2.21482498 | 1.05277604  |
| O  | -0.01114270 | -4.99026212 | -2.34714276 |
| O  | 0.01486333  | -1.93479456 | 3.02712105  |
| O  | -0.04574269 | -3.91236884 | 2.09939975  |

|   |             |             |             |
|---|-------------|-------------|-------------|
| N | -4.42730637 | -1.31242879 | 0.20183067  |
| O | 0.95528474  | -4.00862949 | -0.63127138 |
| N | -1.37606612 | 0.06123280  | 1.45399725  |
| N | 4.43203150  | -1.26314241 | 0.28509834  |
| O | 1.32762014  | -1.07810384 | -1.41022577 |
| N | 0.00336375  | -4.12617896 | -1.48952654 |
| N | 1.31332320  | 0.13237552  | 1.37461985  |
| O | -0.11418090 | -3.73255288 | 4.29113749  |
| N | -0.05146558 | -3.21764532 | 3.18934938  |
| O | 0.56991033  | 0.48112884  | -2.76896134 |
| O | -0.94819937 | -3.24915590 | -1.37729356 |
| N | 0.39900284  | -0.28454454 | -1.83141032 |
| O | -0.71772926 | -0.33833555 | -1.18308885 |
| C | 5.03374782  | -0.13524567 | -0.36504224 |
| C | -3.20967902 | -1.27279469 | 0.80530230  |
| C | -6.98508058 | 1.27869486  | -0.60715528 |
| H | -8.02653444 | 1.50567862  | -0.36023997 |
| C | 0.67849610  | 1.16424677  | 1.96058438  |
| C | -2.70409455 | 0.02094278  | 1.41376892  |
| C | 6.33990884  | 0.25027821  | -0.03719195 |
| H | 6.89054554  | -0.29522558 | 0.73430321  |
| C | -0.76561518 | 1.12751989  | 1.99983305  |
| C | -6.38342229 | 0.15024083  | -0.05439588 |
| H | -6.94409282 | -0.49696969 | 0.62550731  |
| C | -4.92731526 | -2.63694324 | -0.25268221 |
| H | -6.02575789 | -2.59818685 | -0.17993049 |
| H | -4.55080491 | -3.37759189 | 0.46730986  |
| C | 2.64497951  | 0.12125672  | 1.34229642  |
| C | -0.75382922 | 3.29263684  | 3.19267096  |
| H | -1.31981306 | 4.10023144  | 3.66009658  |
| C | -2.87741594 | 2.08951953  | 2.59373566  |
| C | 0.61444673  | 3.32199154  | 3.16706898  |
| H | 1.16217468  | 4.15283281  | 3.61520754  |
| C | 3.42297235  | 1.15911776  | 1.89414493  |
| H | 4.51254520  | 1.14138606  | 1.86095832  |
| C | -5.04723189 | -0.14424337 | -0.35284687 |
| C | -3.50996519 | 1.02453700  | 1.98979382  |
| H | -4.59873615 | 0.97480771  | 1.96662873  |
| C | 4.97626577  | -2.61123860 | -0.02475250 |
| H | 4.65514938  | -3.27731840 | 0.78934854  |
| H | 6.07331151  | -2.51728433 | 0.00407695  |
| C | 1.35410521  | 2.26457738  | 2.55328530  |
| C | -6.27659666 | 2.13518464  | -1.46516140 |
| C | -1.46783846 | 2.20118935  | 2.60955845  |
| C | 6.92193313  | 1.34020088  | -0.68081709 |
| H | 7.93908276  | 1.64113881  | -0.41227905 |
| C | 3.19576093  | -1.20411378 | 0.84641749  |
| C | -4.94195650 | 1.81942105  | -1.75633576 |

|   |             |             |             |
|---|-------------|-------------|-------------|
| H | -4.36902830 | 2.46505198  | -2.42870998 |
| C | -4.32854905 | 0.68692943  | -1.22139777 |
| H | -3.29094791 | 0.44341077  | -1.47600675 |
| C | 4.92083536  | 1.65703486  | -1.97939957 |
| H | 4.35826971  | 2.19701958  | -2.74697362 |
| C | 4.32720668  | 0.56088179  | -1.35326841 |
| H | 3.32159618  | 0.22518615  | -1.63289729 |
| C | 2.76415934  | 2.21254842  | 2.49179416  |
| C | 6.22329227  | 2.06545146  | -1.65994779 |
| C | -6.94386480 | 3.33817722  | -2.08129174 |
| H | -6.21488559 | 4.13244137  | -2.30165153 |
| H | -7.71943431 | 3.75014822  | -1.41762762 |
| C | 4.50230065  | -3.14756751 | -1.37383400 |
| H | 3.41077502  | -3.28791703 | -1.37394530 |
| H | 4.97429184  | -4.12558841 | -1.55852359 |
| H | 4.78063066  | -2.46779752 | -2.19388520 |
| C | 6.87128227  | 3.22602937  | -2.37156370 |
| H | 7.43136700  | 2.87726533  | -3.25636684 |
| H | 7.58361466  | 3.75095682  | -1.71668651 |
| C | -4.47965745 | -2.98697028 | -1.67008930 |
| H | -4.82542002 | -2.23368737 | -2.39491391 |
| H | -4.91234996 | -3.95972398 | -1.95304886 |
| H | -3.38310941 | -3.07026311 | -1.72683700 |
| H | -7.43434578 | 3.06692452  | -3.03220469 |
| H | 6.12016672  | 3.95035130  | -2.72093282 |
| F | -3.60378887 | 3.05404962  | 3.17499730  |
| F | 3.46877447  | 3.21216215  | 3.04036409  |

LOH•Eu(NO<sub>3</sub>)<sub>3</sub>

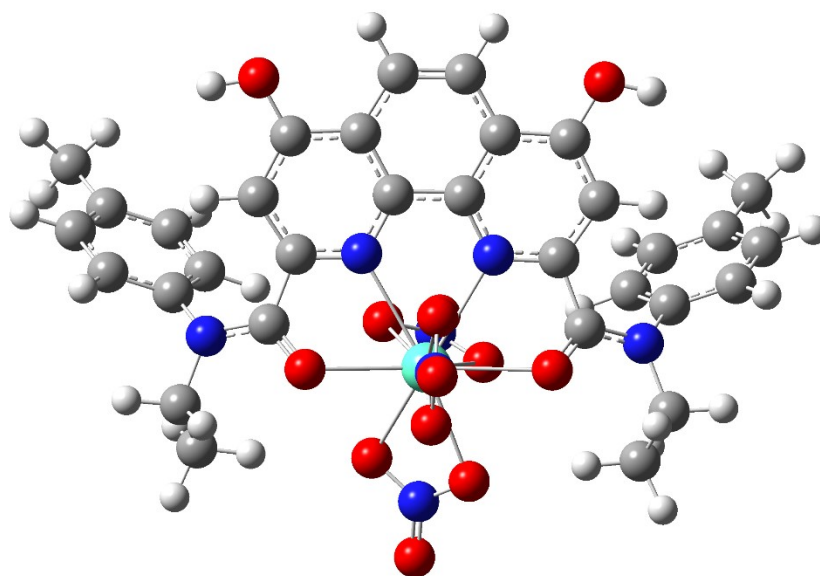

E= -13445.408132



G= 314.5416 kcal/mol, H= 405.9504 kcal/mol, U= 405.3579 kcal/mol, S= 306.5863 cal/mol at T= 298.150 K

|    |             |             |             |
|----|-------------|-------------|-------------|
| Eu | 0.00661713  | -2.03586439 | 0.53589207  |
| O  | -2.48914887 | -2.27888512 | 0.91947982  |
| O  | 2.50613813  | -2.21482498 | 1.05277604  |
| O  | -0.01114270 | -4.99026212 | -2.34714276 |
| O  | 0.01486333  | -1.93479456 | 3.02712105  |
| O  | -0.04574269 | -3.91236884 | 2.09939975  |
| N  | -4.42730637 | -1.31242879 | 0.20183067  |
| O  | 0.95528474  | -4.00862949 | -0.63127138 |
| N  | -1.37606612 | 0.06123280  | 1.45399725  |
| N  | 4.43203150  | -1.26314241 | 0.28509834  |
| O  | 1.32762014  | -1.07810384 | -1.41022577 |
| N  | 0.00336375  | -4.12617896 | -1.48952654 |
| N  | 1.31332320  | 0.13237552  | 1.37461985  |
| O  | -0.11418090 | -3.73255288 | 4.29113749  |
| N  | -0.05146558 | -3.21764532 | 3.18934938  |
| O  | 0.56991033  | 0.48112884  | -2.76896134 |
| O  | -0.94819937 | -3.24915590 | -1.37729356 |
| N  | 0.39900284  | -0.28454454 | -1.83141032 |
| O  | -0.71772926 | -0.33833555 | -1.18308885 |
| C  | 5.03374782  | -0.13524567 | -0.36504224 |
| C  | -3.20967902 | -1.27279469 | 0.80530230  |
| C  | -6.98508058 | 1.27869486  | -0.60715528 |
| H  | -8.02653444 | 1.50567862  | -0.36023997 |
| C  | 0.67849610  | 1.16424677  | 1.96058438  |
| C  | -2.70409455 | 0.02094278  | 1.41376892  |
| C  | 6.33990884  | 0.25027821  | -0.03719195 |
| H  | 6.89054554  | -0.29522558 | 0.73430321  |
| C  | -0.76561518 | 1.12751989  | 1.99983305  |
| C  | -6.38342229 | 0.15024083  | -0.05439588 |
| H  | -6.94409282 | -0.49696969 | 0.62550731  |
| C  | -4.92731526 | -2.63694324 | -0.25268221 |
| H  | -6.02575789 | -2.59818685 | -0.17993049 |
| H  | -4.55080491 | -3.37759189 | 0.46730986  |
| C  | 2.64497951  | 0.12125672  | 1.34229642  |
| C  | -0.75382922 | 3.29263684  | 3.19267096  |
| H  | -1.31981306 | 4.10023144  | 3.66009658  |
| C  | -2.87741594 | 2.08951953  | 2.59373566  |
| C  | 0.61444673  | 3.32199154  | 3.16706898  |
| H  | 1.16217468  | 4.15283281  | 3.61520754  |
| C  | 3.42297235  | 1.15911776  | 1.89414493  |
| H  | 4.51254520  | 1.14138606  | 1.86095832  |
| C  | -5.04723189 | -0.14424337 | -0.35284687 |
| C  | -3.50996519 | 1.02453700  | 1.98979382  |
| H  | -4.59873615 | 0.97480771  | 1.96662873  |
| C  | 4.97626577  | -2.61123860 | -0.02475250 |

|   |             |             |             |
|---|-------------|-------------|-------------|
| H | 4.65514938  | -3.27731840 | 0.78934854  |
| H | 6.07331151  | -2.51728433 | 0.00407695  |
| C | 1.35410521  | 2.26457738  | 2.55328530  |
| C | -6.27659666 | 2.13518464  | -1.46516140 |
| C | -1.46783846 | 2.20118935  | 2.60955845  |
| C | 6.92193313  | 1.34020088  | -0.68081709 |
| H | 7.93908276  | 1.64113881  | -0.41227905 |
| C | 3.19576093  | -1.20411378 | 0.84641749  |
| C | -4.94195650 | 1.81942105  | -1.75633576 |
| H | -4.36902830 | 2.46505198  | -2.42870998 |
| C | -4.32854905 | 0.68692943  | -1.22139777 |
| H | -3.29094791 | 0.44341077  | -1.47600675 |
| C | 4.92083536  | 1.65703486  | -1.97939957 |
| H | 4.35826971  | 2.19701958  | -2.74697362 |
| C | 4.32720668  | 0.56088179  | -1.35326841 |
| H | 3.32159618  | 0.22518615  | -1.63289729 |
| C | 2.76415934  | 2.21254842  | 2.49179416  |
| C | 6.22329227  | 2.06545146  | -1.65994779 |
| C | -6.94386480 | 3.33817722  | -2.08129174 |
| H | -6.21488559 | 4.13244137  | -2.30165153 |
| H | -7.71943431 | 3.75014822  | -1.41762762 |
| C | 4.50230065  | -3.14756751 | -1.37383400 |
| H | 3.41077502  | -3.28791703 | -1.37394530 |
| H | 4.97429184  | -4.12558841 | -1.55852359 |
| H | 4.78063066  | -2.46779752 | -2.19388520 |
| C | 6.87128227  | 3.22602937  | -2.37156370 |
| H | 7.43136700  | 2.87726533  | -3.25636684 |
| H | 7.58361466  | 3.75095682  | -1.71668651 |
| C | -4.47965745 | -2.98697028 | -1.67008930 |
| H | -4.82542002 | -2.23368737 | -2.39491391 |
| H | -4.91234996 | -3.95972398 | -1.95304886 |
| H | -3.38310941 | -3.07026311 | -1.72683700 |
| H | -7.43434578 | 3.06692452  | -3.03220469 |
| H | 6.12016672  | 3.95035130  | -2.72093282 |
| F | -3.60378887 | 3.05404962  | 3.17499730  |
| F | 3.46877447  | 3.21216215  | 3.04036409  |

## 5. References

1. D. N. Laikov and Yu. A. Ustynyuk. *Russ. Chem. Bull.*, 2005, **54**, 820–826.
2. D. N. Laikov, *J. Chem. Phys.*, 2020, **153**, 114121, DOI: 10.1063/5.0014639.
3. M. J. Frisch, G. W. Trucks, H. B. Schlegel, G. E. Scuseria, M. A. Robb, J. R. Cheeseman, G. Scalmani, V. Barone, G. A. Petersson, H. Nakatsuji, X. Li, M. Caricato, A. V. Marenich, J. Bloino, B. G. Janesko, R. Gomperts, B. Mennucci, H. P. Hratchian, J. V. Ortiz, A. F. Izmaylov, J. L. Sonnenberg, D. Williams-Young, F. Ding, F. Lipparini, F. Egidi, J. Goings, B. Peng, A. Petrone, T. Henderson, D. Ranasinghe, V. G. Zakrzewski, J. Gao, N. Rega, G. Zheng, W. Liang, M. Hada, M. Ehara, K. Toyota, R. Fukuda, J. Hasegawa, M. Ishida, T. Nakajima, Y. Honda, O. Kitao, H. Nakai, T. Vreven, K. Throssell, J. A. Montgomery Jr., J. E. Peralta, F. Ogliaro, M. J. Bearpark, J. J. Heyd, E. N. Brothers, K. N. Kudin, V. N. Staroverov, T. A. Keith, R. Kobayashi, J. Normand, K. Raghavachari, A. P. Rendell, J. C. Burant, S. S. Iyengar, J. Tomasi, M. Cossi, J. M. Millam, M. Klene, C. Adamo, R. Cammi, J. W. Ochterski, R. L. Martin, K. Morokuma, O. Farkas, J. B. Foresman and D. J. Fox, *Gaussian 16, Revision C.01*, Gaussian, Inc., Wallingford CT, 2016
4. X. Y. Cao, M. Dolg. *J. Mol. Struct.*, 2002, **581**(1–3), 139–147, DOI: 10.1016/S0166-1280(01)00751-5.
